# Supplementary material for: Catalytic asymmetric tandem Friedel–Crafts alkylation/Michael addition reaction for the synthesis of highly functionalized chromans
Source: publisher site journal article supplement (doi:10.3762/bjoc.9.137), 2013-06-24
Supplement: Additional file 1 [file 1860-5397-9-137-S1.pdf]

## Supporting Information

for

### **Catalytic asymmetric tandem Friedel–Crafts alkylation/Michael addition reaction for the synthesis of highly functionalized chromans**

Jiahuan Peng and Da-Ming Du\*

Address: School of Chemical Engineering and Environment, Beijing Institute of Technology, Beijing 100081, China

Email: Da-Ming Du\*- [dudm@bit.edu.cn](mailto:dudm@bit.edu.cn)

\* Corresponding author

**Characterization data, copies of NMR spectra and HPLC chromatographs of products 3.**

**General Methods:** Commercially available compounds were used without further purification. Solvents were dried according to standard procedures. Column chromatography was performed using silica gel (200–300 mesh). Melting points were determined on a XT–4 melting point apparatus without correction. The  $^1\text{H}$  NMR spectra were measured on Varian Mercury-plus 400 MHz spectrometer. Chemical shifts were recorded in  $\delta$  (ppm) relative to tetramethylsilane (TMS) as the internal standard.  $^{13}\text{C}$  NMR spectra were measured at 100 MHz. Chemical shifts are reported in ppm with the solvent resonance as the internal standard. Infrared spectra were obtained with a Perkin Elmer Spectrum One spectrometer. ESI-HRMS spectra were measured with a Bruker APEX IV Fourier-Transform mass spectrometer. Optical rotations were measured with a WZZ–3 polarimeter. Enantiomeric excesses were determined by chiral HPLC using an Agilent 1200 LC instrument with Daicel Chiralpak IA, IB or ADH column.

**Materials:** Chiral bis(oxazoline) **I–X** [1] and nitroalkene enoates **1** [2] were prepared according to the reported procedures. The racemic reference compounds of **3** were synthesized by the direct treatment of nitroalkene enoates **1** and indoles **2** in the presence of 10 mol%  $\text{Zn}(\text{OTf})_2$ .

**General Procedure (A) for the catalytic asymmetric tandem Friedel–Crafts alkylation/Michael addition reaction of indoles with nitroolefin enoates:** To a dried Schlenk tube were added  $\text{Zn}(\text{OTf})_2$  (7.3 mg, 0.02 mmol), ligand **I** (12.2 mg, 0.02 mmol) and  $\text{NaOtBu}$  (1.9 mg, 0.02 mmol) under argon followed by the addition of toluene (3 mL). The solution was stirred at room temperature for 0.5 h and then nitroolefin enoate **1** (0.2 mmol) was added. The mixture was stirred for 10 min then the indole **2** (0.3 mmol) was added. After stirring for 48 h at room temperature, the solvent was removed under vacuum. Purification by column chromatography afforded the desired product **3**.

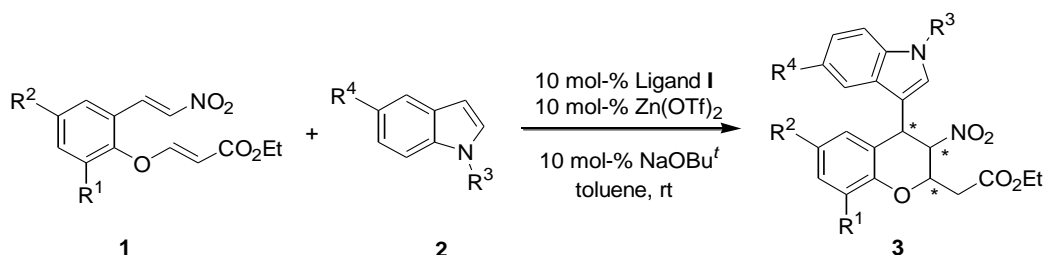

**Ethyl 2-(4-(1*H*-indol-3-yl)-3-nitro-chroman-2-yl)acetate (3a):** Compound **3a** (the mixture of the major and minor diastereomer) was obtained according to the general procedure **A** (27.7 mg, 73% yield). It was analyzed to determine the diastereoselectivity and enantioselectivity of the reaction (96:4 dr, 89% ee for the major diastereomer) by HPLC (Daicel Chiralpak IA column, *n*-hexane/2-propanol 85:15, flow rate  $0.5 \text{ mL}\cdot\text{min}^{-1}$ , detection at 254 nm), major diastereomer:  $t_{\text{major}} = 19.9 \text{ min}$ ,  $t_{\text{minor}} = 18.7 \text{ min}$ ; minor diastereomer:  $t_{\text{R}} = 17.3 \text{ min}$ . The major diastereomer was purified by flash chromatography and obtained as a white solid, mp 163–168 °C.  $[\alpha]_{\text{D}}^{25} = +76.5$  (*c* 1.51 g/100 mL,  $\text{CH}_2\text{Cl}_2$ ).  $^1\text{H}$  NMR (400 MHz,  $\text{CDCl}_3$ )  $\delta$  8.17 (s, 1H, NH), 7.36 (d,  $J = 8.0 \text{ Hz}$ , 1H, ArH), 7.17–7.14 (m, 3H, ArH), 6.95–6.93

(m, 4H, ArH), 6.81 (t,  $J = 7.2$  Hz, 1H, ArH), 5.23 (t,  $J = 10.4$  Hz, 1H, CH), 5.09 (d,  $J = 10.4$  Hz, 1H, CH), 4.94–4.88 (m, 1H, CH), 4.23 (q,  $J = 7.0$  Hz, 2H, CH<sub>2</sub>), 2.84–2.71 (m, 2H, CH<sub>2</sub>), 1.31–1.26 (m, 3H, CH<sub>3</sub>) ppm. <sup>13</sup>C NMR (100 MHz, CDCl<sub>3</sub>) δ 169.1, 152.6, 136.8, 129.5, 128.4, 124.8, 124.5, 122.5, 122.1, 121.9, 119.9, 119.2, 116.6, 111.9, 111.6, 88.2, 73.2, 61.2, 40.5, 37.2, 14.1 ppm. IR (KBr):  $\nu$  3416, 3061, 2983, 2908, 1737, 1585, 1552, 1485, 1456, 1365, 1281, 1230, 1189, 1085, 1055, 745 cm<sup>-1</sup>. HRMS (ESI):  $m/z$  calcd. for C<sub>21</sub>H<sub>20</sub>N<sub>2</sub>NaO<sub>5</sub> [M + Na]<sup>+</sup> 403.12644, found: 403.12618.

**Ethyl 2-(4-(5-methyl-1H-indol-3-yl)-3-nitro-chroman-2-yl)acetate (3b):** Compound **3b**

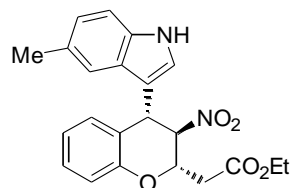

(the mixture of the major and minor diastereomer) was obtained according to the general procedure **A** (54.2 mg, 69% yield). It was analyzed to determine the diastereoselectivity and enantioselectivity of the reaction (90:10 dr, 80% ee for the major diastereomer) by HPLC (Daicel Chiralpak IB column, *n*-hexane/2-propanol = 90:10, flow rate 0.5 mL·min<sup>-1</sup>, detection at 254 nm), major diastereomer:  $t_{\text{major}} = 26.4$  min,  $t_{\text{minor}} = 28.4$  min; minor diastereomer:  $t_{\text{R}} = 22.7$  min. The major diastereomer was purified by flash chromatography and obtained as a yellow oil.  $[\alpha]_{\text{D}}^{25}$ : +98.7 (*c* 3.83 g/100 mL, CH<sub>2</sub>Cl<sub>2</sub>). <sup>1</sup>H NMR (400 MHz, CDCl<sub>3</sub>) δ 8.08 (s, 1H, NH), 7.24 (d,  $J = 7.6$  Hz, 1H, ArH), 7.17 (t,  $J = 7.4$  Hz, 1H, ArH), 7.08 (d,  $J = 2.4$  Hz, 1H, ArH), 6.99–6.93 (m, 3H, ArH), 6.81 (t,  $J = 7.2$  Hz, 1H, ArH), 6.73 (s, 1H, ArH), 5.22 (t,  $J = 10.0$  Hz, 1H, CH), 5.06 (d,  $J = 10.4$  Hz, 1H, CH), 4.94–4.88 (m, 1H, CH), 4.23 (q,  $J = 7.2$  Hz, 2H, CH<sub>2</sub>), 2.86–2.71 (m, 2H, CH<sub>2</sub>), 2.29 (s, 3H, CH<sub>3</sub>), 1.29 (t,  $J = 7.2$  Hz, 3H, CH<sub>3</sub>) ppm. <sup>13</sup>C NMR (100 MHz, CDCl<sub>3</sub>) δ 169.1, 152.6, 135.2, 129.5, 129.2, 128.4, 125.2, 124.5, 124.2, 122.2, 122.1, 118.7, 116.5, 111.4, 111.2, 88.2, 73.3, 61.2, 40.4, 37.3, 21.4, 14.1 ppm. IR (KBr):  $\nu$  3415, 2981, 2925, 1736, 1584, 1552, 1485, 1455, 1367, 1280, 1229, 1197, 1054, 798, 759 cm<sup>-1</sup>. HRMS (ESI): calcd. for C<sub>22</sub>H<sub>23</sub>N<sub>2</sub>O<sub>5</sub> [M + H]<sup>+</sup> 395.16015, found: 395.16069; calcd. for C<sub>22</sub>H<sub>22</sub>N<sub>2</sub>NaO<sub>5</sub> [M + Na]<sup>+</sup> 417.14209, found: 417.14216.

**Ethyl 2-(4-(5-methoxy-1H-indol-3-yl)-3-nitro-chroman-2-yl)acetate (3c):** Compound **3c**

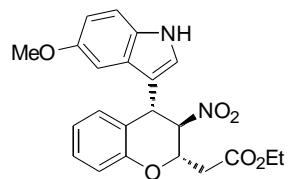

(the mixture of the major and minor diastereomer) was obtained according to the general procedure **A** (62.0 mg, 76% yield). It was analyzed to determine the diastereoselectivity of the reaction by the ratio of weight (93:7 dr). The enantioselectivity for major diastereomer (72% ee) was determined by HPLC (Daicel Chiralpak IA column, *n*-hexane/2-propanol = 90:10, flow rate 0.5 mL·min<sup>-1</sup>, detection at 254 nm),  $t_{\text{major}} = 40.1$  min,  $t_{\text{minor}} = 38.2$  min. The major diastereomer was purified by flash chromatography and obtained as a yellow oil.  $[\alpha]_{\text{D}}^{25}$ : +58.7 (*c* 2.35 g/100 mL, CH<sub>2</sub>Cl<sub>2</sub>). <sup>1</sup>H NMR (400 MHz, CDCl<sub>3</sub>) δ 8.13 (s, 1H, NH), 7.23 (d,  $J = 8.8$  Hz, 1H, ArH), 7.16 (t,  $J = 7.4$  Hz, 1H, ArH), 7.08 (d,  $J = 2.4$  Hz, 1H, ArH), 6.97–6.94 (m, 2H, ArH), 6.84–6.80 (m, 2H, ArH), 6.35 (d,  $J = 2.0$  Hz, 1H, ArH), 5.18 (t,  $J = 10.2$  Hz, 1H, CH), 5.07 (d,  $J = 10.8$  Hz, 1H, CH), 4.93–4.88 (m, 1H, CH), 4.23 (q,  $J = 7.2$  Hz, 2H, CH<sub>2</sub>), 3.62 (s, 3H, OCH<sub>3</sub>), 2.85–2.71 (m, 2H, CH<sub>2</sub>), 1.29 (t,  $J = 7.2$  Hz, 3H, CH<sub>3</sub>) ppm. <sup>13</sup>C NMR (100 MHz, CDCl<sub>3</sub>) δ 169.1, 153.9, 152.6, 131.9, 129.5, 128.4, 125.5, 125.0, 122.1, 121.9, 116.5, 112.3, 111.6, 101.2, 88.2, 73.2, 61.2, 55.6, 40.3, 37.2, 14.1 ppm. IR (KBr):  $\nu$  3417, 2985, 2938, 1736, 1625,

1584, 1553, 1486, 1456, 1366, 1302, 1280, 1222, 1175, 1055, 1029, 925, 804, 760  $\text{cm}^{-1}$ . HRMS (ESI): calcd. for  $\text{C}_{22}\text{H}_{23}\text{N}_2\text{O}_6$   $[\text{M} + \text{H}]^+$  411.15506, found: 411.15478.

**Ethyl 2-(4-(5-chloro-1H-indol-3-yl)-3-nitro-chroman-2-yl)acetate (3d):** Compound **3d** (the mixture of the major and minor diastereomer) was obtained according to the general procedure **A** (40.6 mg, 49% yield). It was analyzed to determine the diastereoselectivity of the reaction by the ratio of weight (82:18 dr). The enantioselectivity for the major diastereomer (62% ee) was determined by HPLC (Daicel Chiralpak IB column, *n*-hexane/2-propanol 90:10, flow rate 0.5  $\text{mL}\cdot\text{min}^{-1}$ , detection at 254 nm),  $t_{\text{major}} = 36.5$  min,  $t_{\text{minor}} = 41.2$  min.

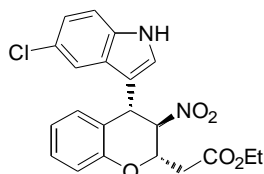

The major diastereomer was purified by flash chromatography and obtained as a yellow oil.  $[\alpha]_{\text{D}}^{25}$ : +39.9 (*c* 1.47 g/100 mL,  $\text{CH}_2\text{Cl}_2$ ).  $^1\text{H}$  NMR (400 MHz,  $\text{CDCl}_3$ )  $\delta$  8.25 (s, 1H, NH), 7.29 (d,  $J = 8.4$  Hz, 1H, ArH), 7.22–7.11 (m, 3H, ArH), 6.97 (d,  $J = 8.4$  Hz, 1H, ArH), 6.90–6.82 (m, 3H, ArH), 5.21–5.16 (m, 1H, CH), 5.06 (d,  $J = 10.4$  Hz, 1H, CH), 4.93–4.88 (m, 1H, CH), 4.24 (q,  $J = 7.2$  Hz, 2H,  $\text{CH}_2$ ), 2.87–2.72 (m, 2H,  $\text{CH}_2$ ), 1.31 (t,  $J = 7.2$  Hz, 3H,  $\text{CH}_3$ ) ppm.  $^{13}\text{C}$  NMR (100 MHz,  $\text{CDCl}_3$ )  $\delta$  169.0, 152.6, 135.2, 129.2, 128.7, 125.9, 125.8, 125.6, 123.0, 122.3, 121.3, 118.6, 116.7, 112.7, 111.6, 88.1, 73.2, 61.3, 40.4, 37.2, 14.1 ppm. IR (KBr):  $\nu$  3423, 2982, 1729, 1584, 1552, 1484, 1456, 1366, 1279, 1228, 1055, 893, 798, 757  $\text{cm}^{-1}$ . HRMS (ESI): calcd. for  $\text{C}_{21}\text{H}_{20}\text{ClN}_2\text{O}_5$   $[\text{M} + \text{H}]^+$  415.10553, found: 415.10519; calcd. for  $\text{C}_{21}\text{H}_{23}\text{ClN}_3\text{O}_5$   $[\text{M} + \text{NH}_4]^+$  432.13207, found: 432.13171.

**Ethyl 2-(4-(1-methyl-1H-indol-3-yl)-3-nitro-chroman-2-yl)acetate (3e) [3]:** Compound **3e** (the mixture of the major and minor diastereomer) was obtained according to the general procedure **A** (47.3 mg, 60% yield). It was analyzed to determine the diastereoselectivity of the reaction by the ratio of weight (88:12 dr). The enantioselectivity for major diastereomer (67% ee) was determined by HPLC (Daicel Chiralpak IA column, *n*-hexane/2-propanol 95:5, flow rate 0.5  $\text{mL}\cdot\text{min}^{-1}$ , detection at 254 nm),

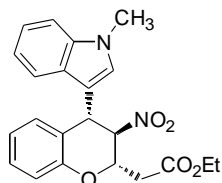

$t_{\text{major}} = 29.3$  min,  $t_{\text{minor}} = 22.4$  min. The major diastereomer was purified by flash chromatography and obtained as a yellow oil.  $[\alpha]_{\text{D}}^{25}$ : +69.7 (*c* 1.56 g/100 mL,  $\text{CH}_2\text{Cl}_2$ ).  $^1\text{H}$  NMR (400 MHz,  $\text{CDCl}_3$ )  $\delta$  7.30 (d,  $J = 8.4$  Hz, 1H, ArH), 7.24–7.14 (m, 2H, ArH), 7.01–6.94 (m, 5H, ArH), 6.82–6.78 (m, 1H, ArH), 5.23–5.17 (m, 1H, CH), 5.07 (d,  $J = 10.4$  Hz, 1H, CH), 4.92–4.86 (m, 1H, CH), 4.22 (q,  $J = 7.2$  Hz, 2H,  $\text{CH}_2$ ), 3.74 (s, 3H,  $\text{NCH}_3$ ), 2.83–2.69 (m, 2H,  $\text{CH}_2$ ), 1.29 (t,  $J = 7.2$  Hz, 3H,  $\text{CH}_3$ ) ppm.  $^{13}\text{C}$  NMR (100 MHz,  $\text{CDCl}_3$ )  $\delta$  169.0, 152.6, 137.6, 129.5, 128.9, 128.3, 125.5, 122.2, 122.1, 122.0, 119.4, 119.3, 116.5, 110.3, 109.6, 88.4, 73.2, 61.1, 40.3, 37.2, 32.8, 14.1 ppm. IR (KBr):  $\nu$  3059, 2982, 2936, 1740, 1584, 1552, 1485, 1456, 1369, 1332, 1281, 1231, 1212, 1187, 1054, 921, 760, 742  $\text{cm}^{-1}$ . HRMS (ESI): calcd. for  $\text{C}_{22}\text{H}_{23}\text{N}_2\text{O}_5$   $[\text{M} + \text{H}]^+$  395.16015, found: 395.15976; calcd. for  $\text{C}_{22}\text{H}_{22}\text{N}_2\text{NaO}_5$   $[\text{M} + \text{Na}]^+$  417.14209, found: 417.14127. The preparation of chiral **3e** with a different configuration was reported in the literature<sup>[3]</sup>,  $[\alpha]_{\text{D}}^{22} -66.63$  (*c* 1.00,  $\text{CHCl}_3$ ), 83% ee (>95:5 dr).

**Ethyl 2-(6-chloro-4-(1*H*-indol-3-yl)-3-nitro-chroman-2-yl)acetate (3f):** Compound **3f** (the

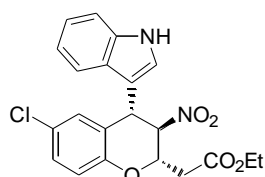

mixture of the major and minor diastereomer) was obtained according to the general procedure **A** (53.8 mg, 65% yield). It was analyzed to determine the diastereoselectivity and enantioselectivity of the reaction (95:5 dr, 91% ee for the major diastereomer) by HPLC (Daicel Chiralpak IA column, *n*-hexane/2-propanol 90:10, flow rate 0.5 mL·min<sup>-1</sup>, detection at 254 nm), major diastereomer:  $t_{\text{major}} = 32.7$  min,  $t_{\text{minor}} = 28.4$  min; minor diastereomer:  $t_{\text{major}} = 22.9$  min,  $t_{\text{minor}} = 20.5$  min. The major diastereomer was purified by flash chromatography and obtained as a yellow oil.  $[\alpha]_{\text{D}}^{25}$ : +12.6 (*c* 2.34 g/100 mL, CH<sub>2</sub>Cl<sub>2</sub>). <sup>1</sup>H NMR (400 MHz, CDCl<sub>3</sub>) δ 8.24 (s, 1H, NH), 7.36 (d, *J* = 8.4 Hz, 1H, ArH), 7.20–7.11 (m, 3H, ArH), 6.99 (d, *J* = 4.0 Hz, 2H, ArH), 6.90 (d, *J* = 8.0 Hz, 2H, ArH), 5.24 (t, *J* = 10.2 Hz, 1H, CH), 5.04 (d, *J* = 10.4 Hz, 1H, CH), 4.91–4.86 (m, 1H, CH), 4.22 (q, *J* = 7.2 Hz, 2H, CH<sub>2</sub>), 2.84–2.71 (m, 2H, CH<sub>2</sub>), 1.28 (t, *J* = 7.2 Hz, 3H, CH<sub>3</sub>) ppm. <sup>13</sup>C NMR (100 MHz, CDCl<sub>3</sub>) δ 168.9, 151.2, 136.8, 128.9, 128.6, 127.1, 124.6, 124.5, 123.8, 122.6, 120.1, 118.9, 118.0, 111.7, 111.0, 87.6, 73.3, 61.3, 40.2, 37.0, 14.1 ppm. IR (KBr): ν 3417, 3060, 2983, 1736, 1554, 1479, 1458, 1365, 1263, 1228, 1186, 1096, 1147, 898, 823, 744 cm<sup>-1</sup>. HRMS (ESI): calcd. for C<sub>21</sub>H<sub>20</sub>ClN<sub>2</sub>O<sub>5</sub> [M + H]<sup>+</sup> 415.10553, found: 415.10520; calcd. for C<sub>21</sub>H<sub>23</sub>ClN<sub>3</sub>O<sub>5</sub> [M + NH<sub>4</sub>]<sup>+</sup> 432.13207, found: 432.13170.

**Ethyl 2-(6-bromo-4-(1*H*-indol-3-yl)-3-nitro-chroman-2-yl)acetate (3g):** Compound **3g**

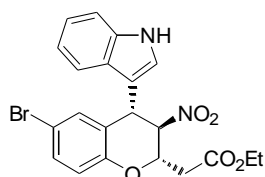

(the mixture of the major and minor diastereomer) was obtained according to the general procedure **A** (60.9 mg, 66% yield). It was analyzed to determine the diastereoselectivity and enantioselectivity of the reaction (93:7 dr, 87% ee for the major diastereomer) by HPLC (Daicel Chiralpak IB column, *n*-hexane/2-propanol 90:10, flow rate 0.5 mL·min<sup>-1</sup>, detection at 254 nm), major diastereomer:  $t_{\text{major}} = 35.7$  min,  $t_{\text{minor}} = 38.8$  min; minor diastereomer:  $t_{\text{major}} = 32.5$  min,  $t_{\text{minor}} = 25.4$  min. The major diastereomer was purified by flash chromatography and obtained as a yellow solid; mp 156–159 °C.  $[\alpha]_{\text{D}}^{25}$ : +6.3 (*c* 1.88 g/100 mL, CH<sub>2</sub>Cl<sub>2</sub>). <sup>1</sup>H NMR (400 MHz, CDCl<sub>3</sub>) δ 8.22 (s, 1H, NH), 7.37 (d, *J* = 8.4 Hz, 1H, ArH), 7.28–7.25 (m, 1H, ArH), 7.21–7.17 (m, 1H, ArH), 7.13 (d, *J* = 2.4 Hz, 1H, ArH), 7.06–7.00 (m, 3H, ArH), 6.85 (d, *J* = 8.8 Hz, 1H, ArH), 5.23 (t, *J* = 10.2 Hz, 1H, CH), 5.05 (d, *J* = 10.8 Hz, 1H, CH), 4.91–4.86 (m, 1H, CH), 4.22 (q, *J* = 7.0 Hz, 2H, CH<sub>2</sub>), 2.83–2.70 (m, 2H, CH<sub>2</sub>), 1.28 (t, *J* = 7.0 Hz, 3H, CH<sub>3</sub>) ppm. <sup>13</sup>C NMR (100 MHz, CDCl<sub>3</sub>) δ 168.9, 151.8, 136.8, 131.8, 131.5, 124.6, 124.5, 124.3, 122.6, 120.2, 118.9, 118.5, 114.5, 111.7, 111.1, 87.6, 73.4, 61.3, 40.1, 37.0, 14.1 ppm. IR (KBr): ν 3418, 2982, 1736, 1553, 1476, 1458, 1365, 1265, 1229, 1184, 1047, 820, 744 cm<sup>-1</sup>. HRMS (ESI): calcd. for C<sub>21</sub>H<sub>20</sub>BrN<sub>2</sub>O<sub>5</sub> [M + H]<sup>+</sup> 459.05501, found: 459.05524; calcd. for C<sub>21</sub>H<sub>19</sub>BrN<sub>2</sub>NaO<sub>5</sub> [M + Na]<sup>+</sup> 481.03696, found: 481.03643.

**Ethyl 2-(4-(1*H*-indol-3-yl)-3,6-dinitro-2*H*-chroman-2-yl)acetate (3h):** Compound **3h** (the

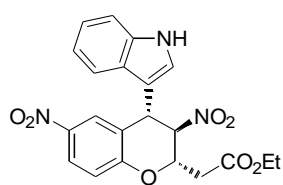

mixture of the major and minor diastereomer) was obtained according to the general procedure **A** (47.8 mg, 56% yield). It was analyzed to determine the diastereoselectivity of the reaction by the ratio of weight (85:15 dr). The enantioselectivity for major diastereomer (80% ee) was determined by HPLC (Daicel Chiralpak AD-H column,

*n*-hexane/2-propanol 80:20, flow rate 1.0 mL·min<sup>-1</sup>, detection at 254 nm),  $t_{\text{major}} = 31.1$  min,  $t_{\text{minor}} = 28.2$  min. The major diastereomer was purified by flash chromatography and obtained as a yellow oil.  $[\alpha]_{\text{D}}^{25}$ : -11.3 (*c* 1.04 g/100 mL, CH<sub>2</sub>Cl<sub>2</sub>). <sup>1</sup>H NMR (400 MHz, CDCl<sub>3</sub>) δ 8.33 (s, 1H, NH), 8.07 (dd,  $J_1 = 8.8$  Hz,  $J_2 = 2.4$  Hz, 1H, ArH), 7.86 (d,  $J = 2.4$  Hz, 1H, ArH), 7.39 (d,  $J = 8.0$  Hz, 1H, ArH), 7.20–7.16 (m, 2H, ArH), 7.07 (d,  $J = 9.2$  Hz, 1H, ArH), 6.98 (t,  $J = 7.6$  Hz, 1H, ArH), 6.91 (d,  $J = 8.0$  Hz, 1H, ArH), 5.32 (t,  $J = 10.0$  Hz, 1H, CH), 5.12 (d,  $J = 10.4$  Hz, 1H, CH), 5.04–4.99 (m, 1H, CH), 4.23 (q,  $J = 7.2$  Hz, 2H, CH<sub>2</sub>), 2.89–2.77 (m, 2H, CH<sub>2</sub>), 1.29 (t,  $J = 7.2$  Hz, 3H, CH<sub>3</sub>) ppm. <sup>13</sup>C NMR (100 MHz, CDCl<sub>3</sub>) δ 168.6, 157.5, 142.6, 137.0, 125.8, 124.9, 124.4, 124.2, 123.2, 122.8, 120.3, 118.5, 117.5, 112.0, 109.9, 86.7, 73.9, 61.4, 40.2, 36.7, 14.1 ppm. IR (KBr):  $\nu$  3417, 3062, 2983, 2928, 1733, 1586, 1556, 1521, 1481, 1459, 1342, 1258, 1208, 1095, 1042, 911, 842, 747 cm<sup>-1</sup>. HRMS (ESI): calcd. for C<sub>21</sub>H<sub>20</sub>N<sub>3</sub>O<sub>7</sub> [M + H]<sup>+</sup> 426.12958, found: 426.12945.

**Ethyl 2-(4-(1*H*-indol-3-yl)-8-methoxy-3-nitro-chroman-2-yl)acetate (3i):** Compound **3i**

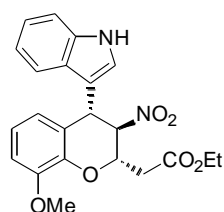

(the major diastereomer) was obtained according to the general procedure **A** (9.9 mg, 12% yield). It was analyzed to determine the diastereoselectivity of the reaction by the ratio of weight (minor diastereomer was not detected). Enantioselectivity for the major diastereomer (24% ee) was determined by HPLC (Daicel Chiralpak IA column, *n*-hexane/2-propanol 90:10, flow rate 1.0 mL·min<sup>-1</sup>, detection at 254 nm),  $t_{\text{major}} = 21.6$  min,  $t_{\text{minor}} = 18.9$  min; The major diastereomer was purified by flash chromatography and obtained as a white solid; mp 160–162 °C.  $[\alpha]_{\text{D}}^{25}$ : +22.0 (*c* 0.88 g/100 mL, CH<sub>2</sub>Cl<sub>2</sub>). <sup>1</sup>H NMR (400 MHz, CDCl<sub>3</sub>) δ 8.20 (s, 1H, NH), 7.35 (d,  $J = 8.4$  Hz, 1H, ArH), 7.17–7.12 (m, 2H, ArH), 6.98–6.93 (m, 2H, ArH), 6.79–6.73 (m, 2H, ArH), 6.56–6.54 (m, 1H, ArH), 5.25 (t,  $J = 10.0$  Hz, 1H, CH), 5.11 (d,  $J = 10.4$  Hz, 1H, CH), 4.94–4.88 (m, 1H, CH), 4.23–4.17 (m, 2H, CH<sub>2</sub>), 3.87 (s, 3H, CH<sub>3</sub>), 2.91 (dd,  $J_1 = 7.6$  Hz,  $J_2 = 16.0$  Hz, 1H, CH<sub>2</sub>), 2.79 (dd,  $J_1 = 4.0$  Hz,  $J_2 = 16.0$  Hz, 1H, CH<sub>2</sub>), 1.28 (t,  $J = 7.0$  Hz, 3H, CH<sub>3</sub>) ppm. <sup>13</sup>C NMR (100 MHz, CDCl<sub>3</sub>) δ 169.0, 148.1, 142.5, 136.8, 124.9, 124.4, 123.1, 122.5, 121.8, 121.0, 119.9, 119.3, 112.1, 111.6, 110.6, 88.2, 73.4, 61.2, 56.1, 40.4, 37.1, 14.1 ppm. IR (KBr):  $\nu$  3414, 2985, 1729, 1587, 1551, 1480, 1459, 1369, 1325, 1267, 1202, 1088, 1078, 767, 741 cm<sup>-1</sup>. HRMS (ESI): calcd. for C<sub>22</sub>H<sub>23</sub>N<sub>2</sub>O<sub>6</sub> [M + H]<sup>+</sup> 411.15506, found: 411.15549; calcd. for C<sub>22</sub>H<sub>26</sub>N<sub>3</sub>O<sub>6</sub> [M + NH<sub>4</sub>]<sup>+</sup> 428.18161, found: 428.18254.

**Ethyl 2-(8-ethoxy-4-(1*H*-indol-3-yl)-3-nitro-chroman-2-yl)acetate (3j):** Compound **3j** (the

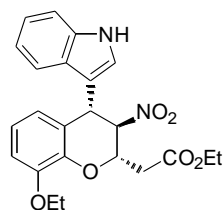

mixture of the major and minor diastereomer) was obtained according to the general procedure **A** (40.3 mg, 47% yield). It was analyzed to determine the diastereoselectivity of the reaction by the ratio of weight (85:15 dr). Enantioselectivity for the major diastereomer (31% ee) was determined by HPLC (Daicel Chiralpak IA column, *n*-hexane/2-propanol 85:15, flow rate 0.5 mL·min<sup>-1</sup>, detection at 254 nm),  $t_{\text{major}} = 22.2$  min,  $t_{\text{minor}} = 19.0$  min. The major diastereomer was purified by flash chromatography and obtained as a yellow oil.  $[\alpha]_{\text{D}}^{25}$ : +29.3 (*c* 0.75 g/100 mL, CH<sub>2</sub>Cl<sub>2</sub>). <sup>1</sup>H NMR (400 MHz, CDCl<sub>3</sub>) δ 8.21 (s, 1H, NH), 7.34 (d,  $J = 8.4$  Hz, 1H, ArH), 7.17–7.11 (m, 2H, ArH), 6.98–6.92 (m, 2H, ArH), 6.79–6.71 (m, 2H, ArH), 6.55 (d,  $J = 7.6$  Hz, 1H, ArH), 5.20 (t,  $J = 10.0$  Hz, 1H, CH), 5.11 (d,  $J = 10.4$  Hz, 1H, CH), 4.94–4.88 (m, 1H, CH), 4.21 (q,  $J = 7.2$  Hz, 2H, CH<sub>2</sub>), 4.07 (q,  $J =$

7.0 Hz, 2H, CH<sub>2</sub>), 2.91 (dd,  $J_1 = 8.4$  Hz,  $J_2 = 16.0$  Hz, 1H, CH<sub>2</sub>), 2.76 (dd,  $J_1 = 3.6$  Hz,  $J_2 = 15.6$  Hz, 1H, CH<sub>2</sub>), 1.44 (t,  $J = 7.0$  Hz, 3H, CH<sub>3</sub>), 1.30 (t,  $J = 7.0$  Hz, 3H, CH<sub>3</sub>) ppm. <sup>13</sup>C NMR (100 MHz, CDCl<sub>3</sub>) δ 169.1, 147.4, 136.8, 124.9, 124.3, 123.2, 122.5, 121.9, 121.2, 119.9, 119.3, 112.5, 112.1, 111.5, 88.5, 73.5, 64.9, 61.2, 40.4, 37.3, 14.9, 14.2 ppm. IR (KBr):  $\nu$  3411, 2982, 2935, 1737, 1552, 1472, 1366, 1342, 1266, 1203, 1094, 1065, 767, 744 cm<sup>-1</sup>. HRMS (ESI): calcd. for C<sub>23</sub>H<sub>25</sub>N<sub>2</sub>O<sub>6</sub> [M + H]<sup>+</sup> 425.17071, found: 425.17123; calcd. for C<sub>23</sub>H<sub>28</sub>N<sub>3</sub>O<sub>6</sub> [M + NH<sub>4</sub>]<sup>+</sup> 442.19726, found: 442.19779.

**Ethyl 2-(6,8-dibromo-4-(1*H*-indol-3-yl)-3-nitro-chroman-2-yl)acetate (3k):** Compound **3k** (the mixture of the major and minor diastereomer) was obtained according to the general

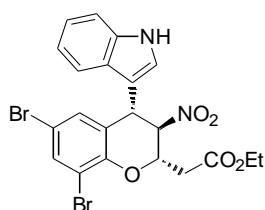

procedure **A** (23.1 mg, 21% yield). It was analyzed to determine the diastereoselectivity and enantioselectivity of the reaction (72:28 dr, 57% ee for the major diastereomer) by HPLC (Daicel Chiralpak IA column, *n*-hexane/2-propanol 90:10, flow rate 1.0 mL·min<sup>-1</sup>, detection at 254 nm), major diastereomer:  $t_{\text{major}} = 17.6$  min,  $t_{\text{minor}} = 16.3$  min; minor diastereomer:  $t_{\text{major}} = 10.0$  min,  $t_{\text{minor}} = 9.3$  min. The major diastereomer was purified by flash chromatography and obtained as a yellow oil.  $[\alpha]_{\text{D}}^{25}$ : +29.3 ( $c$  0.75 g/100 mL, CH<sub>2</sub>Cl<sub>2</sub>). <sup>1</sup>H NMR (400 MHz, CDCl<sub>3</sub>) δ 8.24 (s, 1H, NH), 7.62 (d,  $J = 2.0$  Hz, 1H, ArH), 7.56 (d,  $J = 8.0$  Hz, 1H, ArH), 7.41 (d,  $J = 8.0$  Hz, 1H, ArH), 7.30–7.18 (m, 4H, ArH), 6.61 (d,  $J = 2.0$  Hz, 1H, ArH), 5.16 (t,  $J = 1.8$  Hz, 1H, CH), 5.02 (s, 1H, CH), 4.80–4.77 (m, 1H, CH), 4.17–4.08 (m, 2H, CH<sub>2</sub>), 2.97 (dd,  $J_1 = 8.4$  Hz,  $J_2 = 16.8$  Hz, 1H, CH<sub>2</sub>), 2.75 (dd,  $J_1 = 5.2$  Hz,  $J_2 = 16.8$  Hz, 1H, CH<sub>2</sub>), 1.18 (t,  $J = 7.2$  Hz, 3H, CH<sub>3</sub>) ppm. <sup>13</sup>C NMR (100 MHz, CDCl<sub>3</sub>) δ 169.3, 149.4, 136.4, 134.2, 132.0, 125.1, 124.8, 123.9, 123.3, 120.6, 117.5, 116.1, 113.9, 111.9, 111.8, 84.0, 69.1, 61.3, 36.6, 36.3, 14.0 ppm. IR (KBr):  $\nu$  3415, 3063, 2982, 2930, 1733, 1552, 1455, 1366, 1316, 1286, 1244, 1191, 1097, 1026, 921, 864, 745 cm<sup>-1</sup>. HRMS (ESI): calcd. for C<sub>21</sub>H<sub>19</sub>Br<sub>2</sub>N<sub>2</sub>O<sub>5</sub> [M + H]<sup>+</sup> 536.96552, found: 536.96564; calcd. for C<sub>21</sub>H<sub>22</sub>Br<sub>2</sub>N<sub>3</sub>O<sub>5</sub> [M + NH<sub>4</sub>]<sup>+</sup> 553.99207, found: 553.99228.

**General procedure (B) for the catalytic asymmetric tandem Friedel–Crafts alkylation/Michael addition reaction of indoles with nitroolefin enoates:** To a dried Schlenk tube were added Zn(OTf)<sub>2</sub> (7.3 mg, 0.02 mmol), ligand **I** (12.2 mg, 0.02 mmol) under argon followed by addition of the toluene (3 mL). The solution was stirred at room temperature for 0.5 h and then nitroolefin enoate **1** (0.2 mmol) was added. The mixture was stirred for 10 min then the indole **2** (0.3 mmol) was added. After stirring for 72 h at –10 °C, Et<sub>3</sub>N (100 mg, 1 mmol) was added and stirred for another 24 h at room temperature. The solvent was removed under vacuum. Purification by column chromatography afforded the desired product **3**.

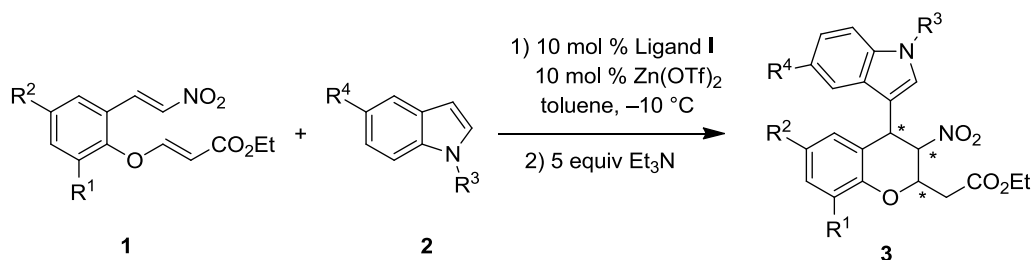

**Ethyl 2-(4-(1*H*-indol-3-yl)-3-nitro-chroman-2-yl)acetate (3a):** Compound **3a** (the mixture of the major and minor diastereomer) was obtained according to the general procedure **B** (67.2 mg, 88% yield). It was analyzed to determine the diastereoselectivity and enantioselectivity of the reaction (92:8 dr, 92% ee for the major diastereomer and 88% ee for the minor diastereomer) by HPLC (Daicel Chiralpak IA column, *n*-hexane/2-propanol 85:15, flow rate 0.5 mL·min<sup>-1</sup>, detection at 254 nm), major diastereomer:  $t_{\text{major}} = 19.8$  min,  $t_{\text{minor}} = 18.9$  min; minor diastereomer:  $t_{\text{major}} = 16.9$  min,  $t_{\text{minor}} = 14.4$  min.  $[\alpha]_{\text{D}}^{25} = +90.1$  (*c* 3.02 g/100 mL, CH<sub>2</sub>Cl<sub>2</sub>).

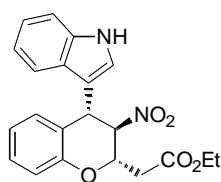

**Ethyl 2-(4-(5-methyl-1*H*-indol-3-yl)-3-nitro-chroman-2-yl)acetate (3b):** Compound **3b** (the mixture of the major and minor diastereomer) was obtained according to the general procedure **B** (69.1 mg, 88% yield). It was analyzed to determine the diastereoselectivity of the reaction by the ratio of weight (44:56 dr). Enantioselectivity for major diastereomer (98% ee) and minor diastereomer (62% ee) were determined by HPLC separately (Daicel Chiralpak IA column, *n*-hexane/2-propanol 90:10, flow rate 0.5 mL·min<sup>-1</sup>, detection at 254 nm and IB column, *n*-hexane/2-propanol 90:10, flow rate 0.5 mL·min<sup>-1</sup>, detection at 254 nm), major diastereomer:  $t_{\text{major}} = 23.3$  min,  $t_{\text{minor}} = 19.0$  min; minor diastereomer:  $t_{\text{major}} = 28.0$  min,  $t_{\text{minor}} = 30.7$  min. The major diastereomer was purified by flash chromatography and obtained as a yellow oil.  $[\alpha]_{\text{D}}^{25}$ (major diastereomer):  $-2.8$  (*c* 2.17 g/100 mL, CH<sub>2</sub>Cl<sub>2</sub>),  $[\alpha]_{\text{D}}^{25}$ (minor diastereomer):  $+29.9$  (*c* 1.78 g/100 mL, CH<sub>2</sub>Cl<sub>2</sub>).

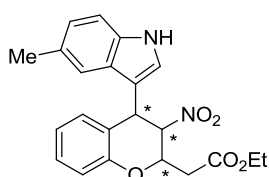

**Ethyl 2-(4-(5-methoxy-1*H*-indol-3-yl)-3-nitro-chroman-2-yl)acetate (3c):** Compound **3c** (the mixture of the major and minor diastereomer) was obtained according to the general procedure **B** (78.8 mg, 96% yield). It was analyzed to determine the diastereoselectivity of the reaction by the ratio of weight (28:72 dr). Enantioselectivity for the major diastereomer (99% ee) and the minor diastereomer (73% ee) were determined by HPLC separately (Daicel Chiralpak IB column, *n*-hexane/2-propanol 90:10, flow rate 0.5 mL·min<sup>-1</sup>, detection at 254 nm and IA column, *n*-hexane/2-propanol 90:10, flow rate 0.5 mL·min<sup>-1</sup>, detection at 254 nm), major diastereomer:  $t_{\text{major}} = 34.8$  min,  $t_{\text{minor}} = 33.2$  min; minor diastereomer:  $t_{\text{major}} = 42.9$  min,  $t_{\text{minor}} = 40.8$  min. The major diastereomer was purified by flash chromatography and obtained as a yellow oil.  $[\alpha]_{\text{D}}^{25}$ (major diastereomer):  $-3.15$  (*c* 2.67 g/100 mL, CH<sub>2</sub>Cl<sub>2</sub>),  $[\alpha]_{\text{D}}^{25}$ (minor diastereomer):  $+34.8$  (*c* 1.36 g/100 mL, CH<sub>2</sub>Cl<sub>2</sub>).

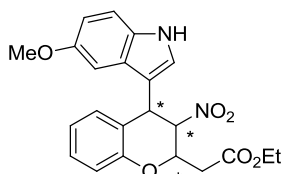

**Ethyl 2-(4-(5-chloro-1*H*-indol-3-yl)-3-nitro-chroman-2-yl)acetate (3d):** Compound **3d** (the mixture of the major and minor diastereomer) was obtained according to the general procedure **B** (47.8 mg, 58% yield). It was analyzed to determine the diastereoselectivity and enantioselectivity of the reaction (76:24 dr, 82% ee for the major diastereomer and 53% ee for the minor diastereomer) by HPLC (Daicel Chiralpak IB column, *n*-hexane/2-propanol 90:10, flow rate 0.5 mL·min<sup>-1</sup>, detection at 254 nm), major diastereomer:

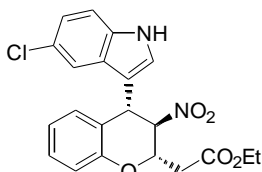



$t_{\text{major}} = 36.4$  min,  $t_{\text{minor}} = 41.2$  min; minor diastereomer:  $t_{\text{major}} = 28.6$  min,  $t_{\text{minor}} = 27.1$  min. The major diastereomer was purified by flash chromatography and obtained as a yellow oil.  $[\alpha]_{\text{D}}^{25}$ (major diastereomer): +17.6 ( $c$  1.67 g/100 mL,  $\text{CH}_2\text{Cl}_2$ ).

**Ethyl 2-(4-(1-methyl-1H-indol-3-yl)-3-nitro-chroman-2-yl)acetate (3e):** Compound **3e** (the mixture of the major and minor diastereomer) was obtained according to the general procedure **B** (70.1 mg, 89% yield). It was analyzed to determine the diastereoselectivity of the reaction by the ratio of weight (82:18 dr). Enantioselectivity for major diastereomer (65% ee) and minor diastereomer (79% ee) were determined by HPLC separately (Daicel Chiralpak IA column,  $n$ -hexane/2-propanol = 95:5, flow rate

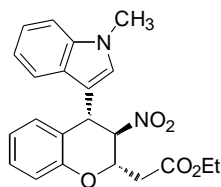

$0.5 \text{ mL}\cdot\text{min}^{-1}$ , detection at 254 nm), major diastereomer:  $t_{\text{major}} = 29.0$  min,  $t_{\text{minor}} = 22.1$  min; minor diastereomer:  $t_{\text{major}} = 23.7$  min,  $t_{\text{minor}} = 21.4$  min. The major diastereomer was purified by flash chromatography and obtained as a yellow oil.  $[\alpha]_{\text{D}}^{25}$ (major diastereomer): +53.0 ( $c$  2.81 g/100 mL,  $\text{CH}_2\text{Cl}_2$ ),  $[\alpha]_{\text{D}}^{25}$ (minor diastereomer): -15.1 ( $c$  1.07 g/100 mL,  $\text{CH}_2\text{Cl}_2$ ).

**Ethyl 2-(6-chloro-4-(1H-indol-3-yl)-3-nitro-chroman-2-yl)acetate (3f):** Compound **3f** (the mixture of the major and minor diastereomer) was obtained according to the general procedure **B** (71.4 mg, 86% yield). It was analyzed to determine the diastereoselectivity and enantioselectivity of the reaction (74:26 dr, 95% ee for the major diastereomer, 95% ee for the minor diastereomer) by HPLC (Daicel Chiralpak IA column,

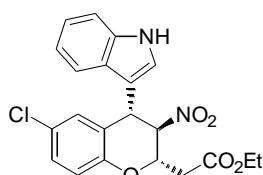

$n$ -hexane/2-propanol 90:10, flow rate  $0.5 \text{ mL}\cdot\text{min}^{-1}$ , detection at 254 nm), major diastereomer:  $t_{\text{major}} = 32.2$  min,  $t_{\text{minor}} = 28.5$  min; minor diastereomer:  $t_{\text{major}} = 22.1$  min,  $t_{\text{minor}} = 20.1$  min. The major diastereomer was purified by flash chromatography and obtained as a yellow oil.  $[\alpha]_{\text{D}}^{25}$ (major diastereomer): +10.0 ( $c$  2.07 g/100 mL,  $\text{CH}_2\text{Cl}_2$ ).

**Ethyl 2-(6-bromo-4-(1H-indol-3-yl)-3-nitro-chroman-2-yl)acetate (3g):** Compound **3g** (the mixture of the major and minor diastereomer) was obtained according to the general procedure **B** (91.8 mg, 100% yield). It was analyzed to determine the diastereoselectivity and enantioselectivity of the reaction (60:40 dr, 91% ee for the major diastereomer, 93% ee for the minor diastereomer) by HPLC (Daicel Chiralpak IB column,

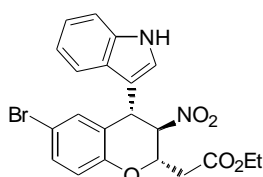

$n$ -hexane/2-propanol 90:10, flow rate  $0.5 \text{ mL}\cdot\text{min}^{-1}$ , detection at 254 nm), major diastereomer:  $t_{\text{major}} = 37.9$  min,  $t_{\text{minor}} = 41.6$  min; minor diastereomer:  $t_{\text{major}} = 34.0$  min,  $t_{\text{minor}} = 26.6$  min.  $[\alpha]_{\text{D}}^{25}$ (major diastereomer): +7.4 ( $c$  2.74 g/100 mL,  $\text{CH}_2\text{Cl}_2$ ).

**Ethyl 2-(4-(1H-indol-3-yl)-3,6-dinitro-chroman-2-yl)acetate (3h):** Compound **3h** (the mixture of the major and minor diastereomer) was obtained according to the general procedure **B** (76.1 mg, 89% yield). It was analyzed to determine the diastereoselectivity and enantioselectivity of the reaction (49:51 dr, 95% ee for both diastereomers) by HPLC (Daicel Chiralpak IA + AD-H column,  $n$ -hexane/2-propanol 80:20, flow rate

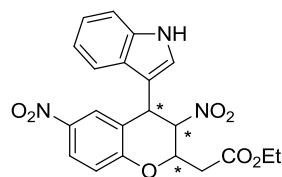

$1.0 \text{ mL}\cdot\text{min}^{-1}$ , detection at 254 nm), major diastereomer:  $t_{\text{major}} = 18.4$  min,  $t_{\text{minor}} = 22.3$  min;

minor diastereomer:  $t_{\text{major}} = 28.5$  min,  $t_{\text{minor}} = 26.5$  min. Both diastereomers were purified by flash chromatography and obtained as yellow oils.  $[\alpha]_{\text{D}}^{25}$ (major diastereomer):  $-160.0$  ( $c$  1.32 g/100 mL,  $\text{CH}_2\text{Cl}_2$ ).

**Ethyl 2-(4-(1*H*-indol-3-yl)-8-methoxy-3-nitro-chroman-2-yl)acetate (3i):** Compound **3i**

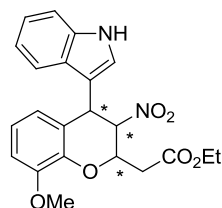

(the mixture of the major and minor diastereomer) was obtained according to the general procedure **B** (69.6 mg, 85% yield). It was analyzed to determine the diastereoselectivity of the reaction by the ratio of weight (58:42 dr). Enantioselectivity for major diastereomer (39% ee) and minor diastereomer (83% ee) were determined by HPLC separately (Daicel Chiralpak IA column, *n*-hexane/2-propanol 90:10, flow rate 1.0 mL·min<sup>-1</sup>, detection at 254 nm and IA column, *n*-hexane/2-propanol 95:5, flow rate 0.5 mL·min<sup>-1</sup>, detection at 254 nm), major diastereomer:  $t_{\text{major}} = 23.0$  min,  $t_{\text{minor}} = 20.2$  min; minor diastereomer:  $t_{\text{major}} = 79.4$  min,  $t_{\text{minor}} = 85.7$  min. The major diastereomer was purified by flash chromatography and obtained as a white solid; mp 167–172 °C. The minor diastereomer was purified by flash chromatography and obtained as yellow oil.  $[\alpha]_{\text{D}}^{25}$  (major diastereomer):  $+39.2$  ( $c$  1.55 g/100 mL,  $\text{CH}_2\text{Cl}_2$ ),  $[\alpha]_{\text{D}}^{25}$  (minor diastereomer):  $+28.0$  ( $c$  1.27 g/100 mL,  $\text{CH}_2\text{Cl}_2$ ).

**Ethyl 2-(8-ethoxy-4-(1*H*-indol-3-yl)-3-nitro-chroman-2-yl)acetate (3j):** Compound **3j**

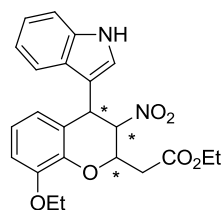

(the mixture of the major and minor diastereomer) was obtained according to the general procedure **B** (79.7 mg, 94% yield). It was analyzed to determine the diastereoselectivity of the reaction by the ratio of weight (54:46 dr). Enantioselectivity for major diastereomer (30% ee) and minor diastereomer (97% ee) were determined by HPLC separately (Daicel Chiralpak IA column, *n*-hexane/2-propanol 85:15, flow rate 0.5 mL·min<sup>-1</sup>, detection at 254 nm and AD-H column, *n*-hexane/2-propanol 90:10, flow rate 0.5 mL·min<sup>-1</sup>, detection at 254 nm), major diastereomer:  $t_{\text{major}} = 22.5$  min,  $t_{\text{minor}} = 19.5$  min; minor diastereomer:  $t_{\text{major}} = 51.5$  min,  $t_{\text{minor}} = 49.2$  min. Both diastereomers were purified by flash chromatography and obtained as a yellow oil.  $[\alpha]_{\text{D}}^{25}$  (major diastereomer):  $+38.4$  ( $c$  1.78 g/100 mL,  $\text{CH}_2\text{Cl}_2$ ),  $[\alpha]_{\text{D}}^{25}$  (minor diastereomer):  $+58.0$  ( $c$  1.57 g/100 mL,  $\text{CH}_2\text{Cl}_2$ ).

**Ethyl 2-(6,8-dibromo-4-(1*H*-indol-3-yl)-3-nitro-chroman-2-yl)acetate (3k):** Compound **3k**

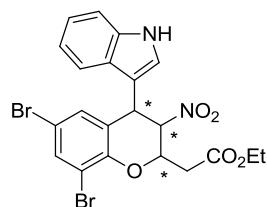

(the mixture of the major and minor diastereomer) was obtained according to general procedure **B** (81.2 mg, 75% yield). It was analyzed to determine the diastereoselectivity and enantioselectivity of the reaction (38:62 dr, 90% ee for the major diastereomer, 53% ee for the minor diastereomer) by HPLC (Daicel Chiralpak IA column, *n*-hexane/2-propanol 90:10, flow rate 1.0 mL·min<sup>-1</sup>, detection at 254 nm), major diastereomer:  $t_{\text{major}} = 9.8$  min,  $t_{\text{minor}} = 9.2$  min; minor diastereomer:  $t_{\text{major}} = 17.5$  min,  $t_{\text{minor}} = 16.3$  min. The major diastereomer was purified by flash chromatography and obtained as a white solid; mp 189–191 °C. The minor diastereomer was purified by flash chromatography and obtained as a white solid, mp 91–95 °C.  $[\alpha]_{\text{D}}^{25}$ (major diastereomer):  $+41.0$  ( $c$  1.46 g/100 mL,  $\text{CH}_2\text{Cl}_2$ ),  $[\alpha]_{\text{D}}^{25}$ (minor diastereomer):  $+39.2$  ( $c$  0.97 g/100 mL,  $\text{CH}_2\text{Cl}_2$ ).

## References:

1. (a) Liu, H.; Xu, J.-X.; Du, D. M. *Org. Lett.* **2007**, *9*, 4725. (b) Lu, S. F.; Du, D. M.; Zghang, S.-W.; Xu, J. *Tetrahedron: Asymmetry* **2004**, *15* (21), 3433.
2. (a) Ciganek, E. *Synthesis* **1995**, 1311. (b) Lu, L.-Q.; Li, F.; An, J.; Zhang, J.-J.; An, X.-L.; Hua, Q.-L.; Xiao, W.-J. *Angew. Chem., Int. Ed.* **2009**, *48*, 9542.
3. Li, C.; Liu, F.-L.; Zou, Y.-Q.; Lu, L.-Q.; Chen, J.-R.; Xiao, W.-J. *Synthesis* **2013**, *45*, 601–608 (See for a similar preparation of a stereoisomer of **3e**.)

# Copies of $^1\text{H}$ and $^{13}\text{C}$ NMR spectra of new compounds

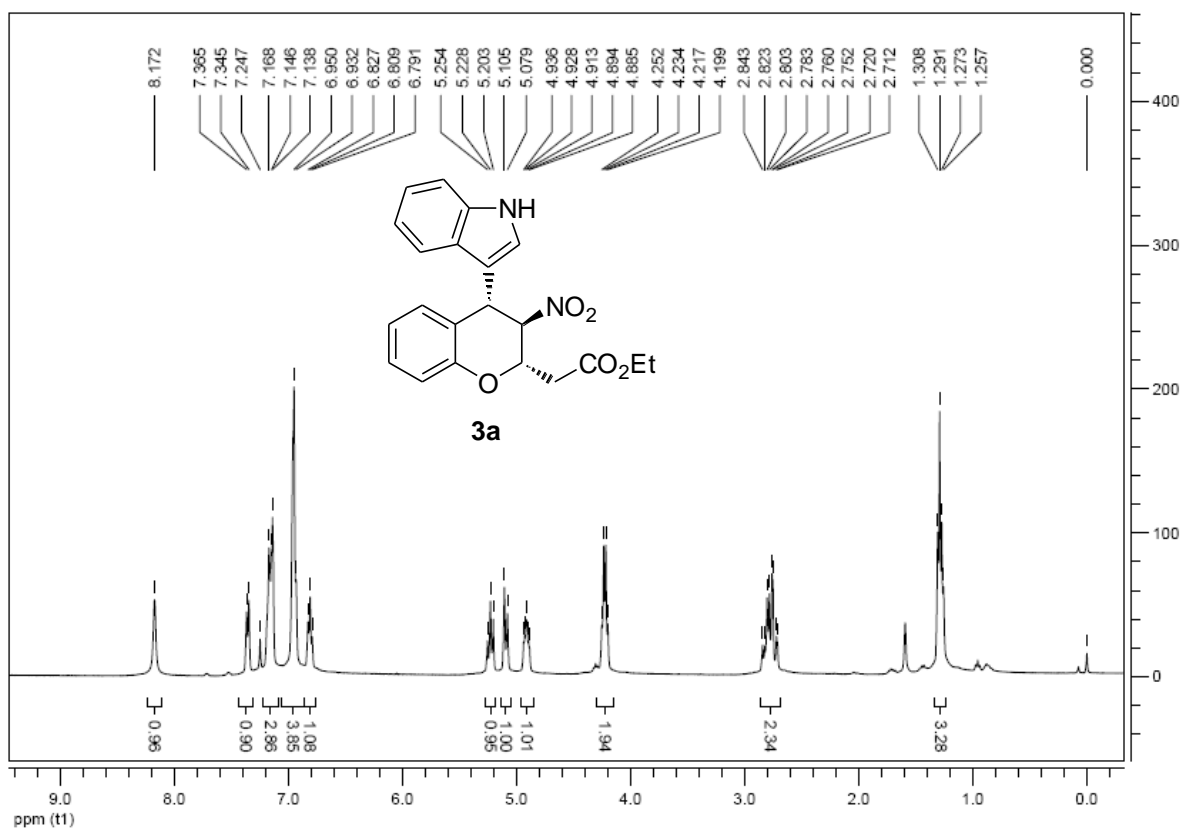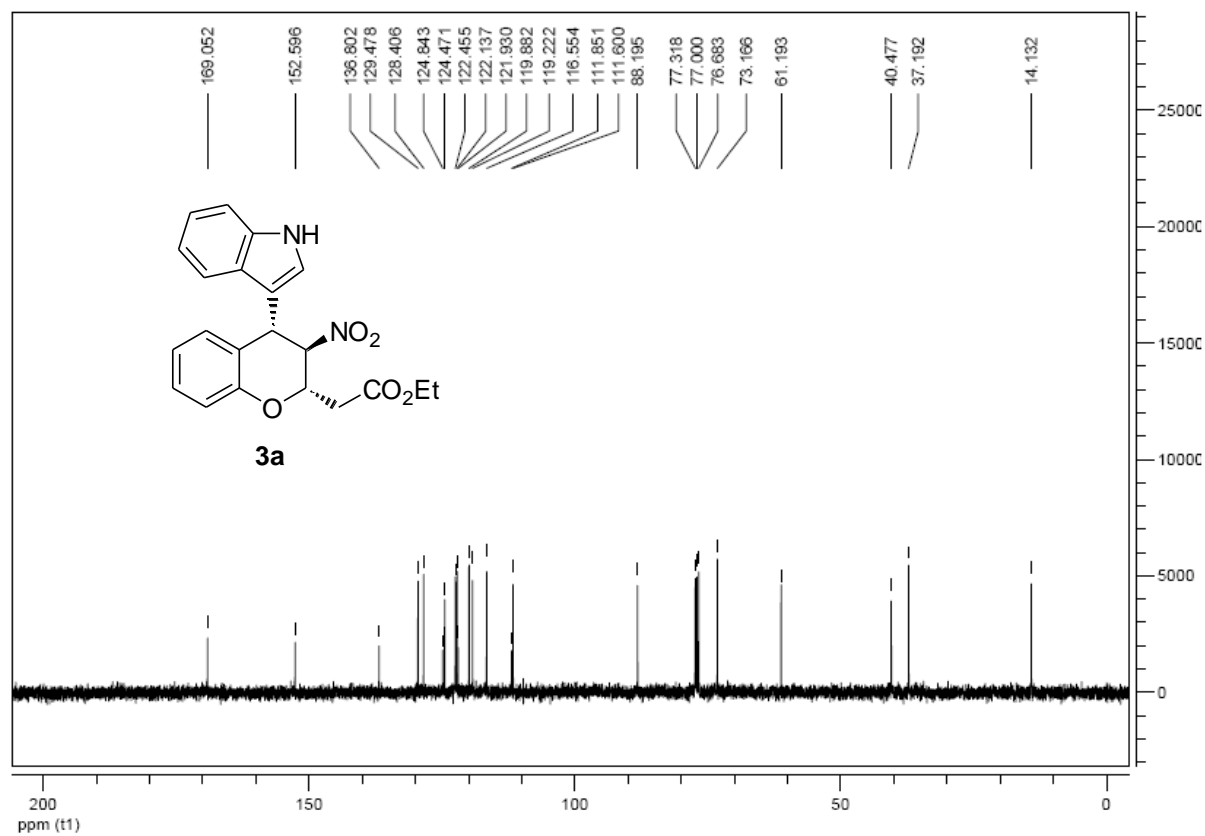

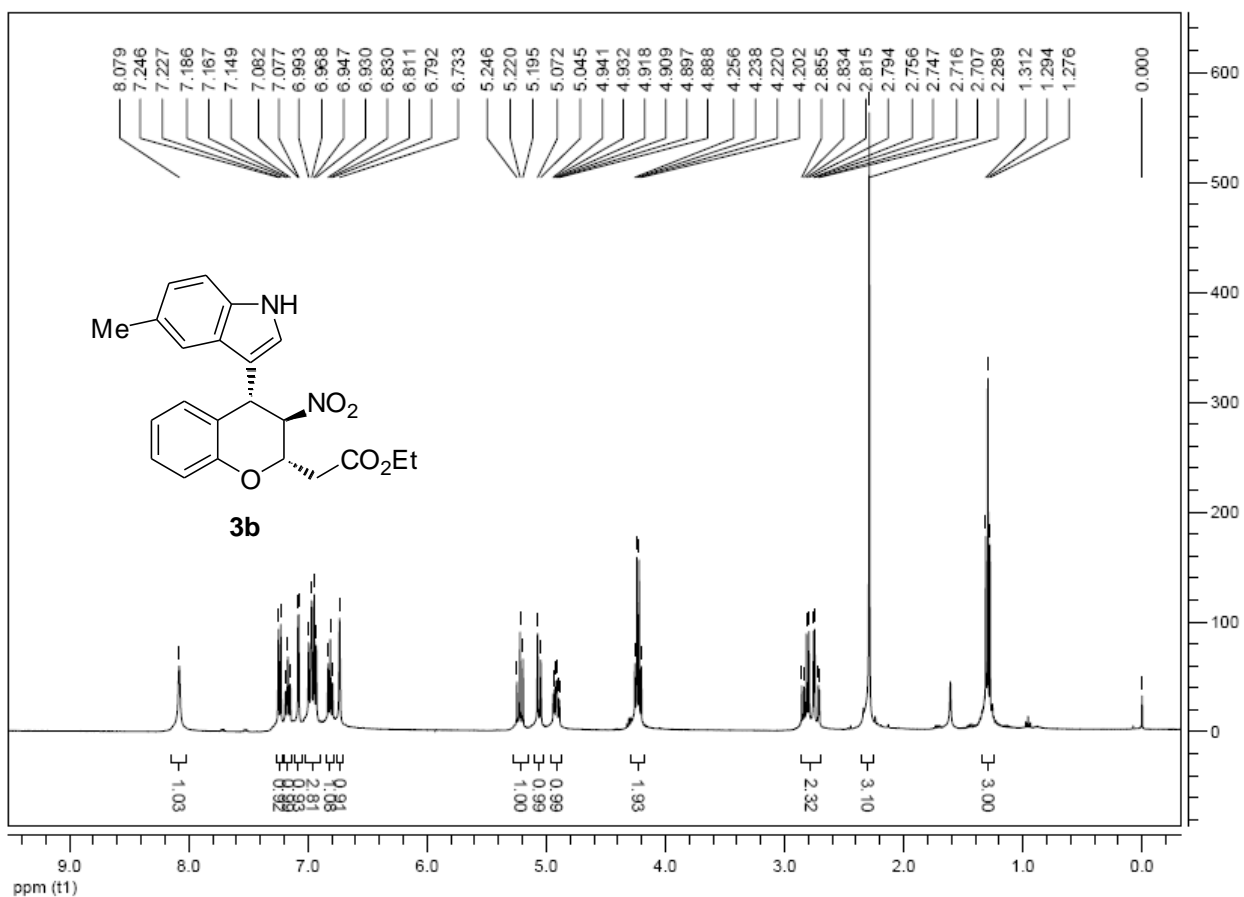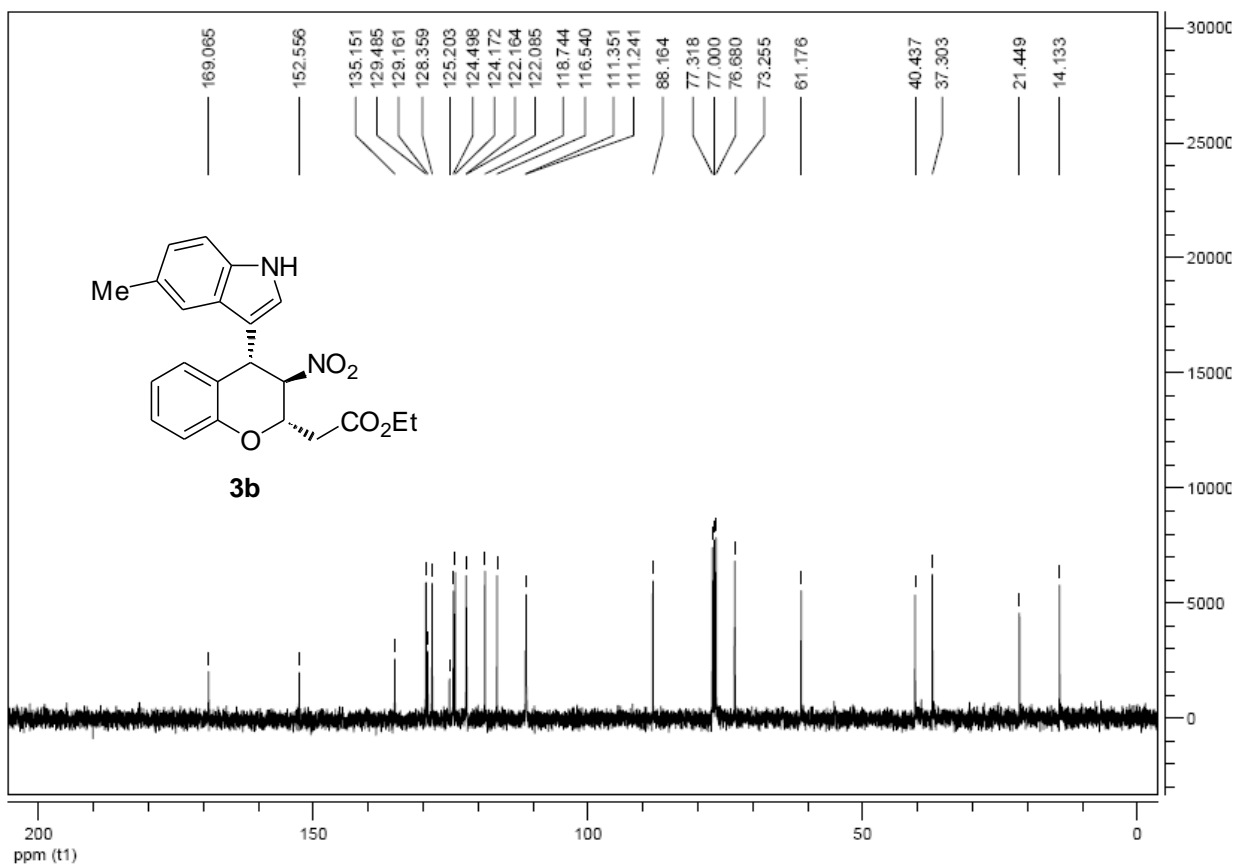

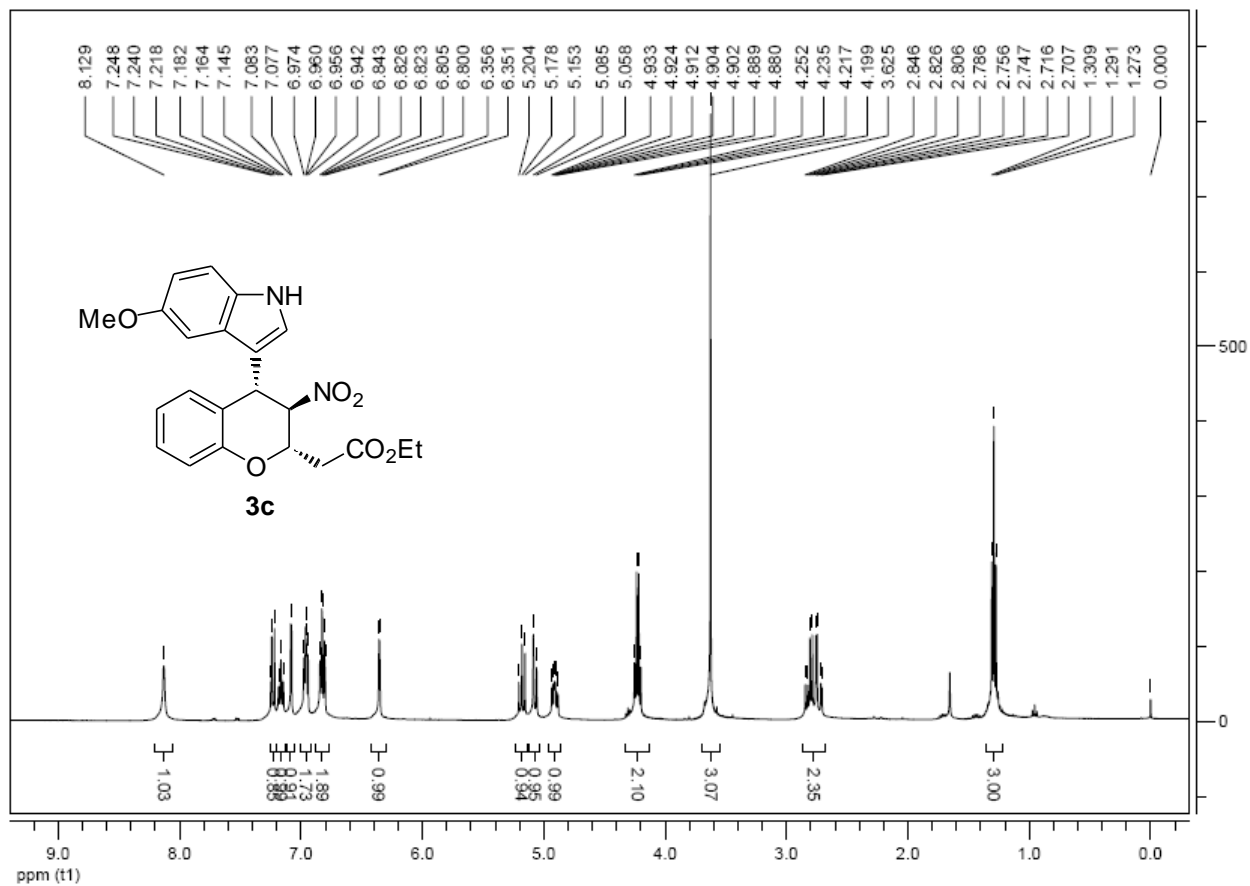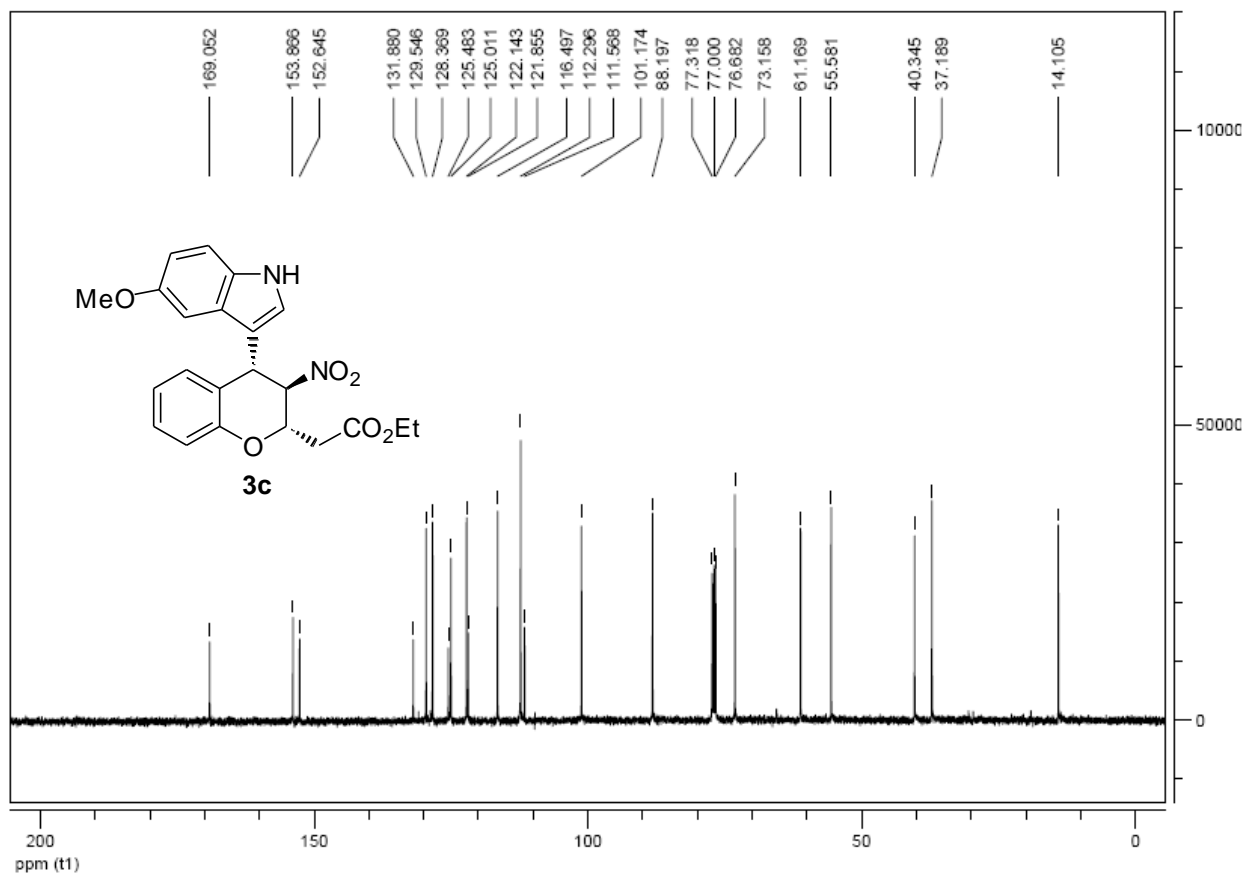

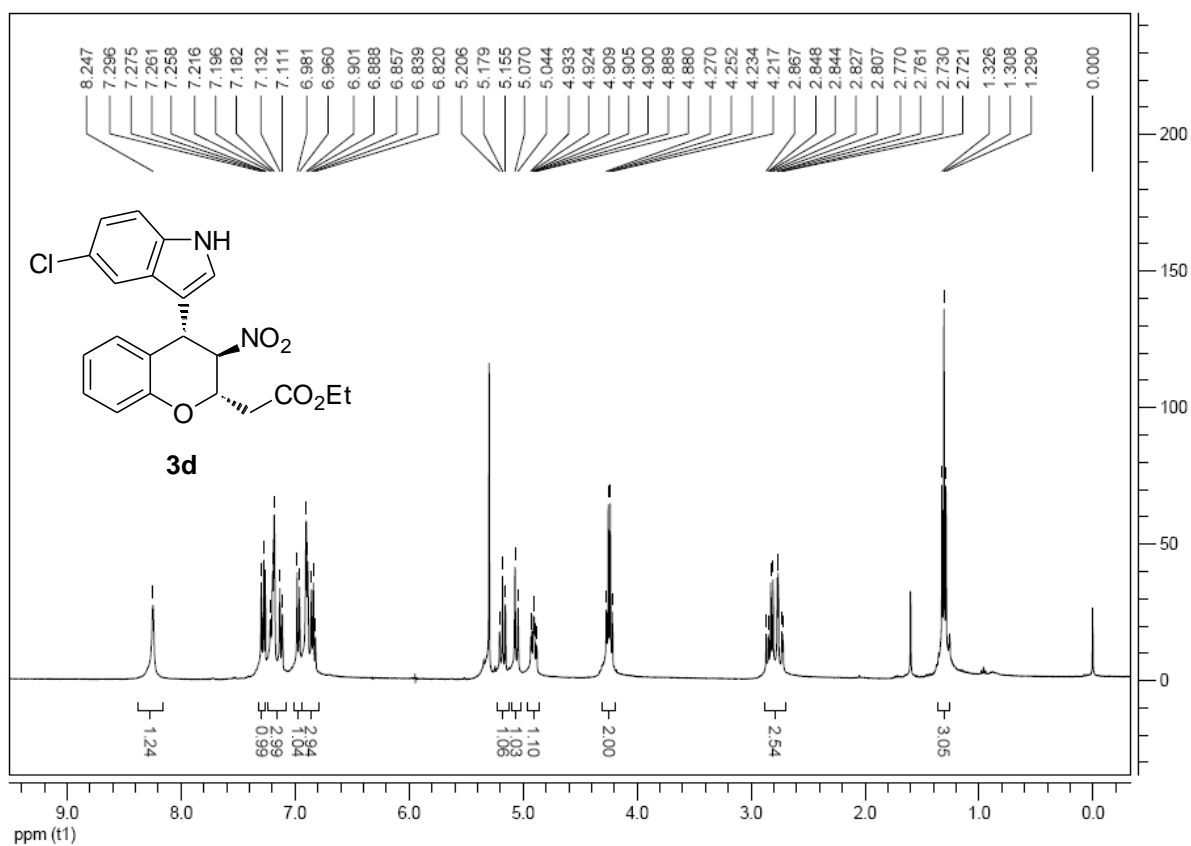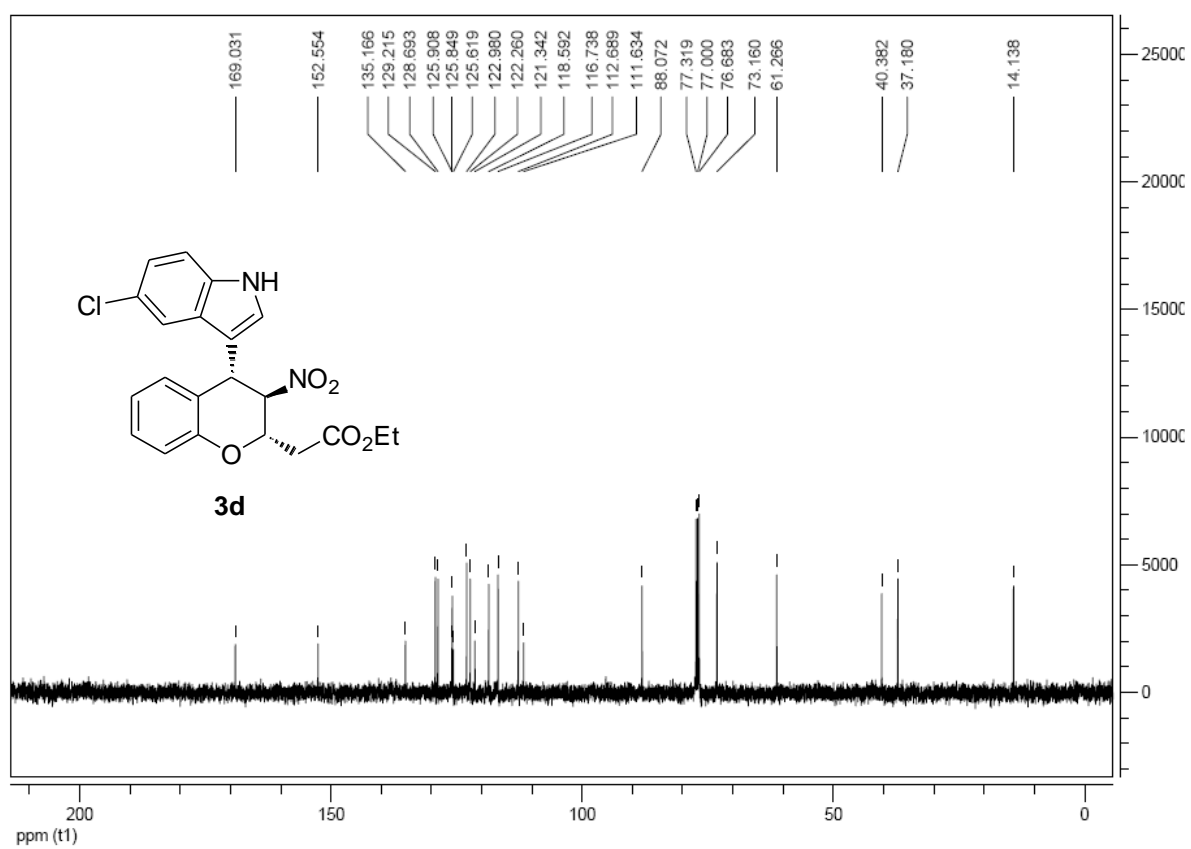

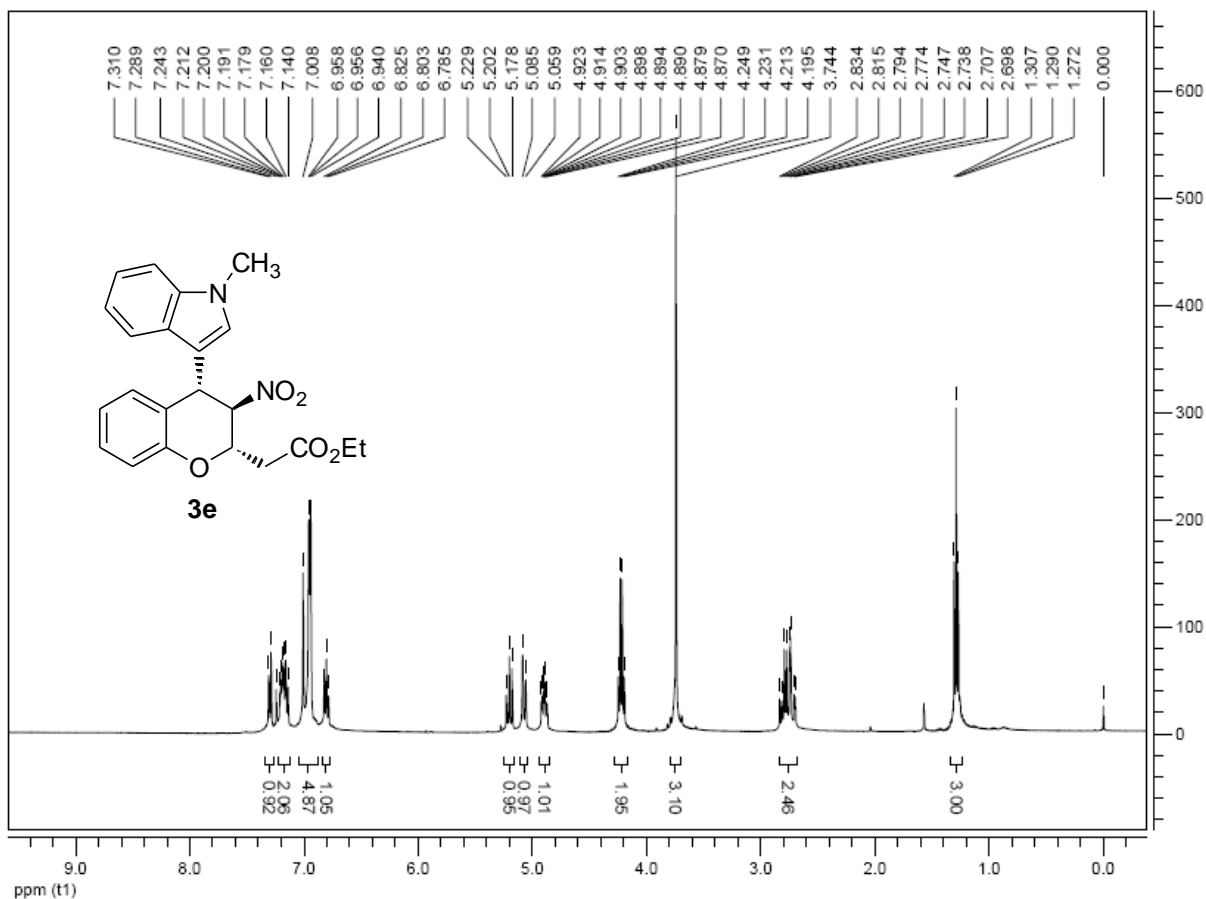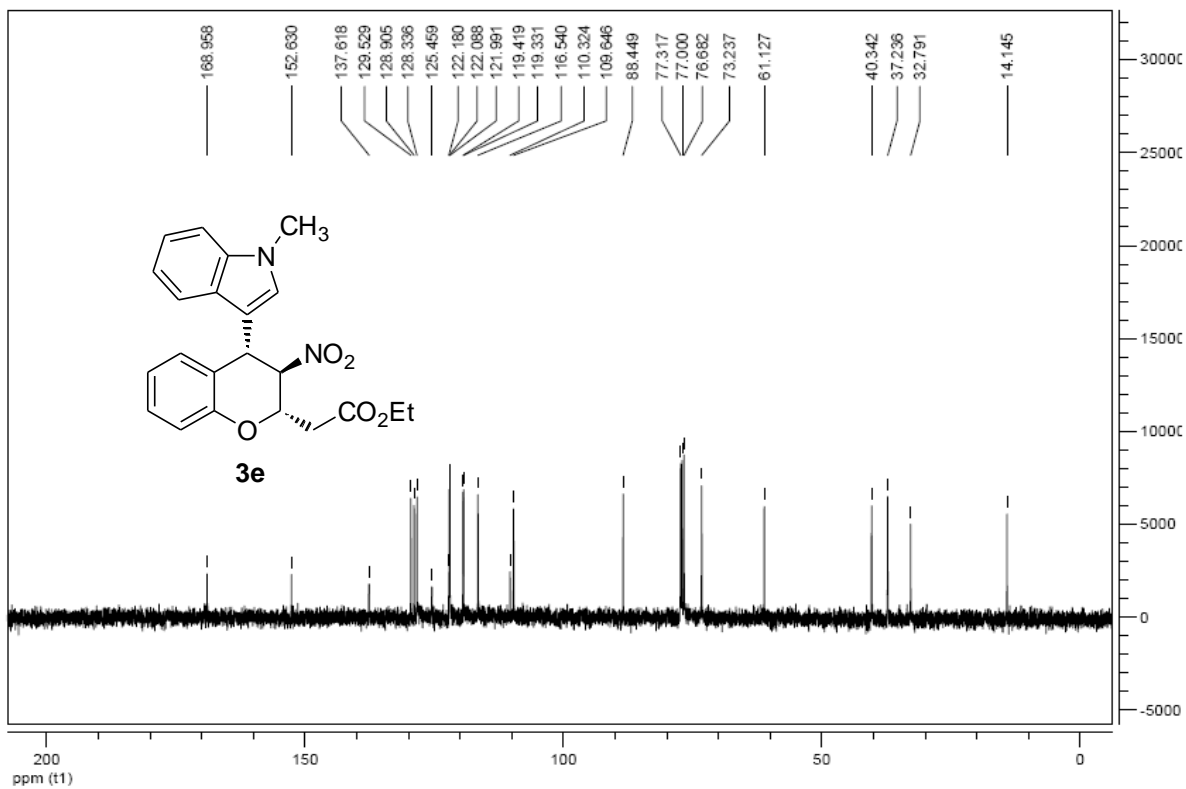



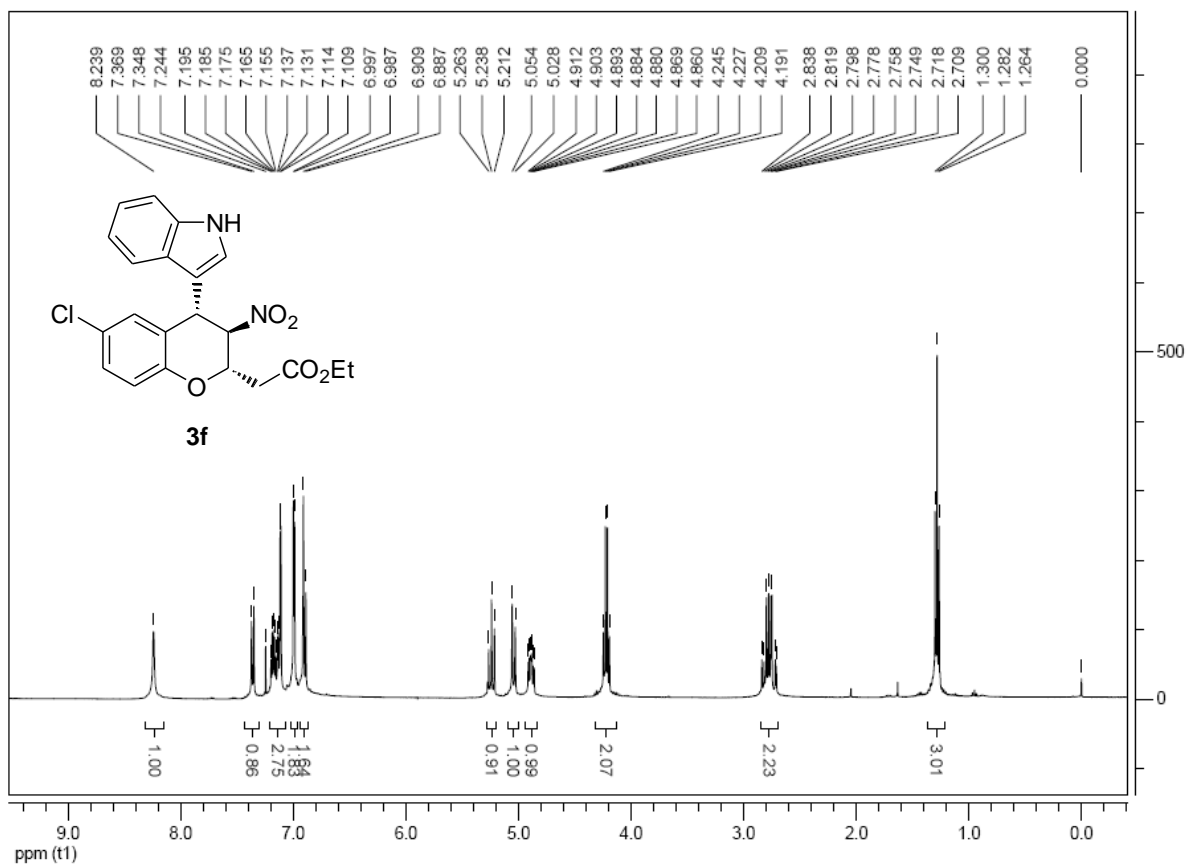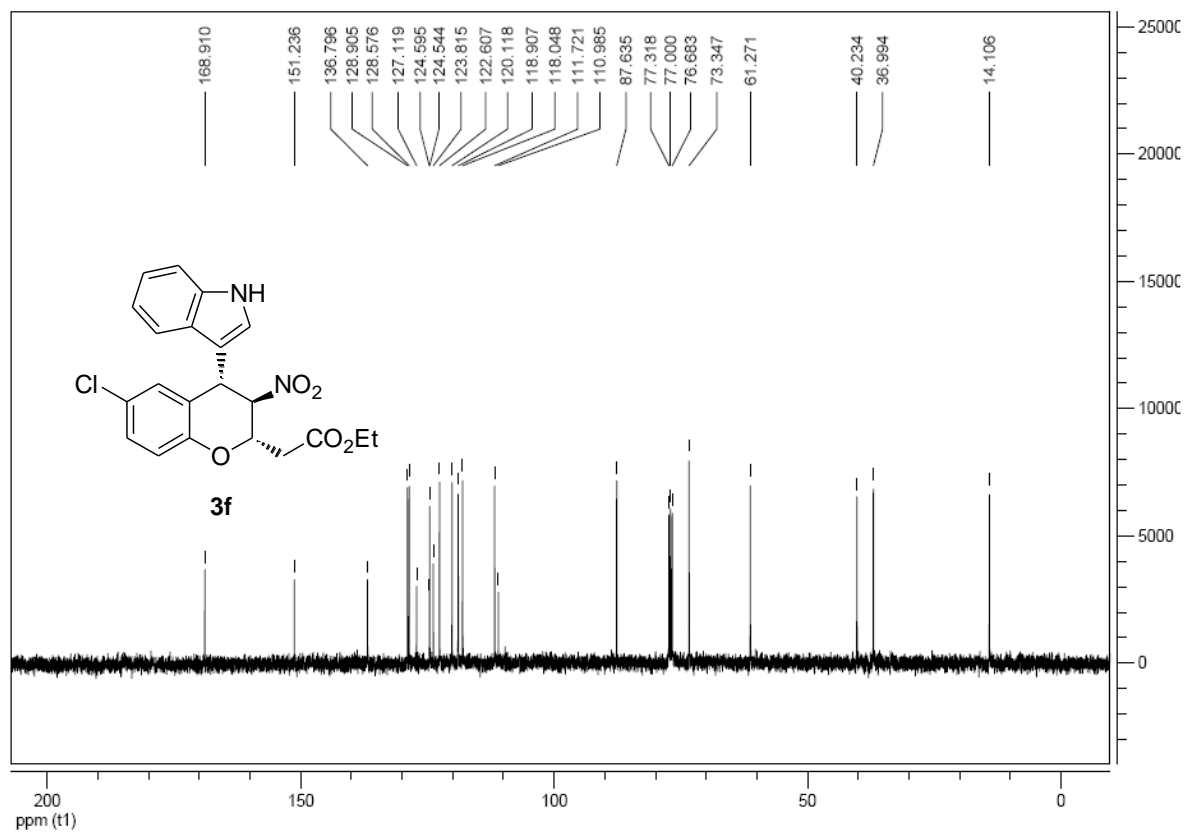

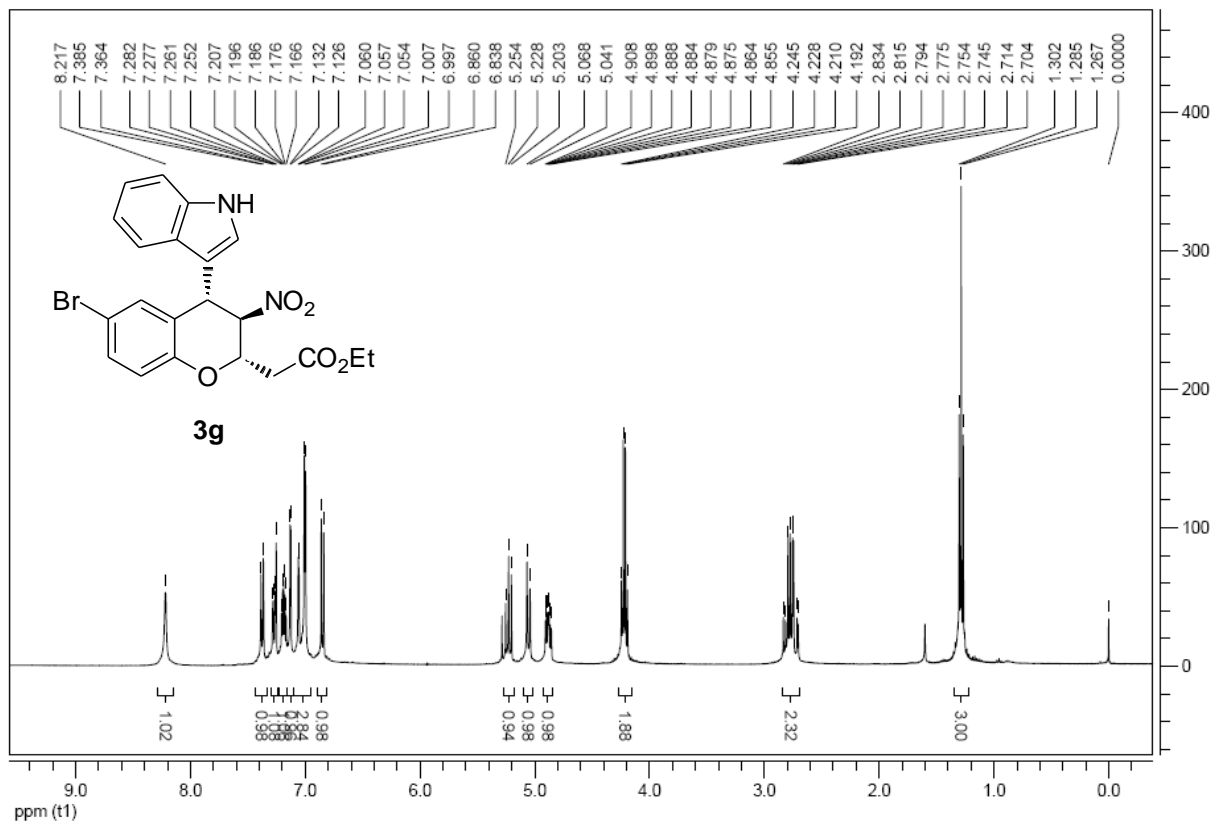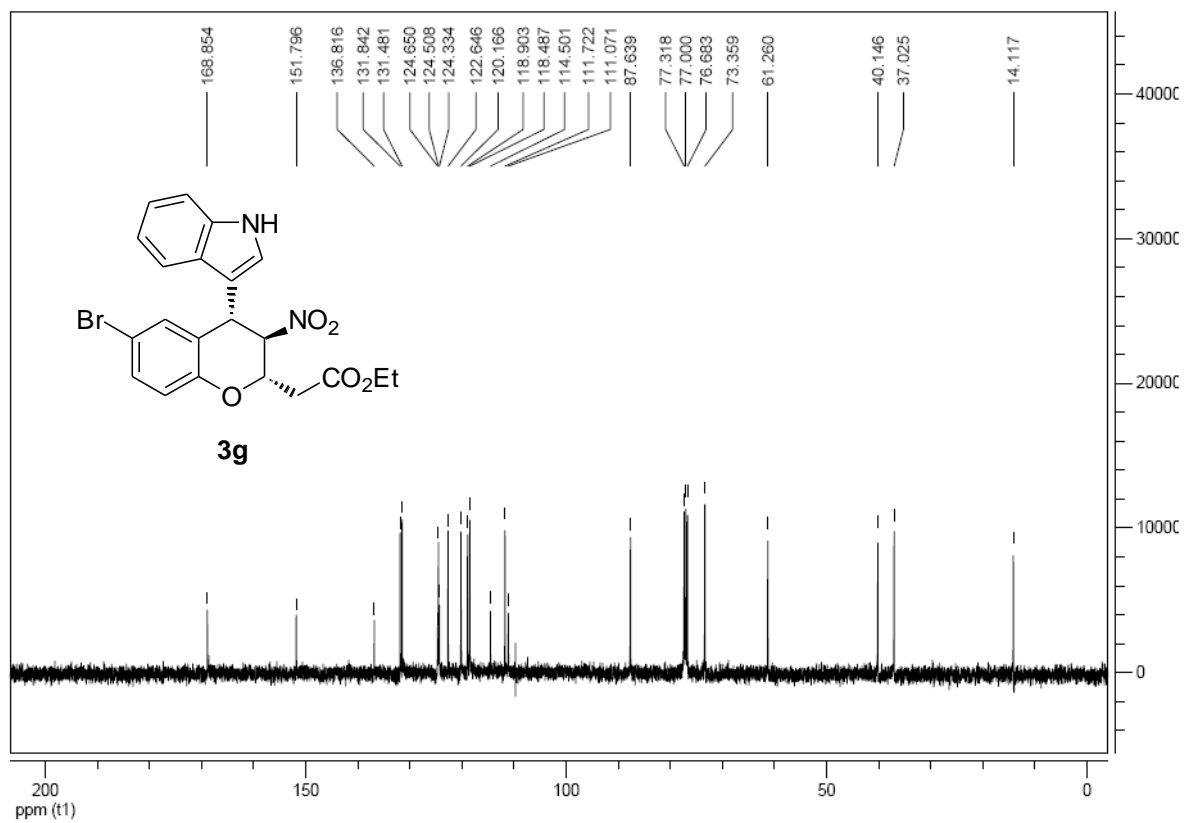



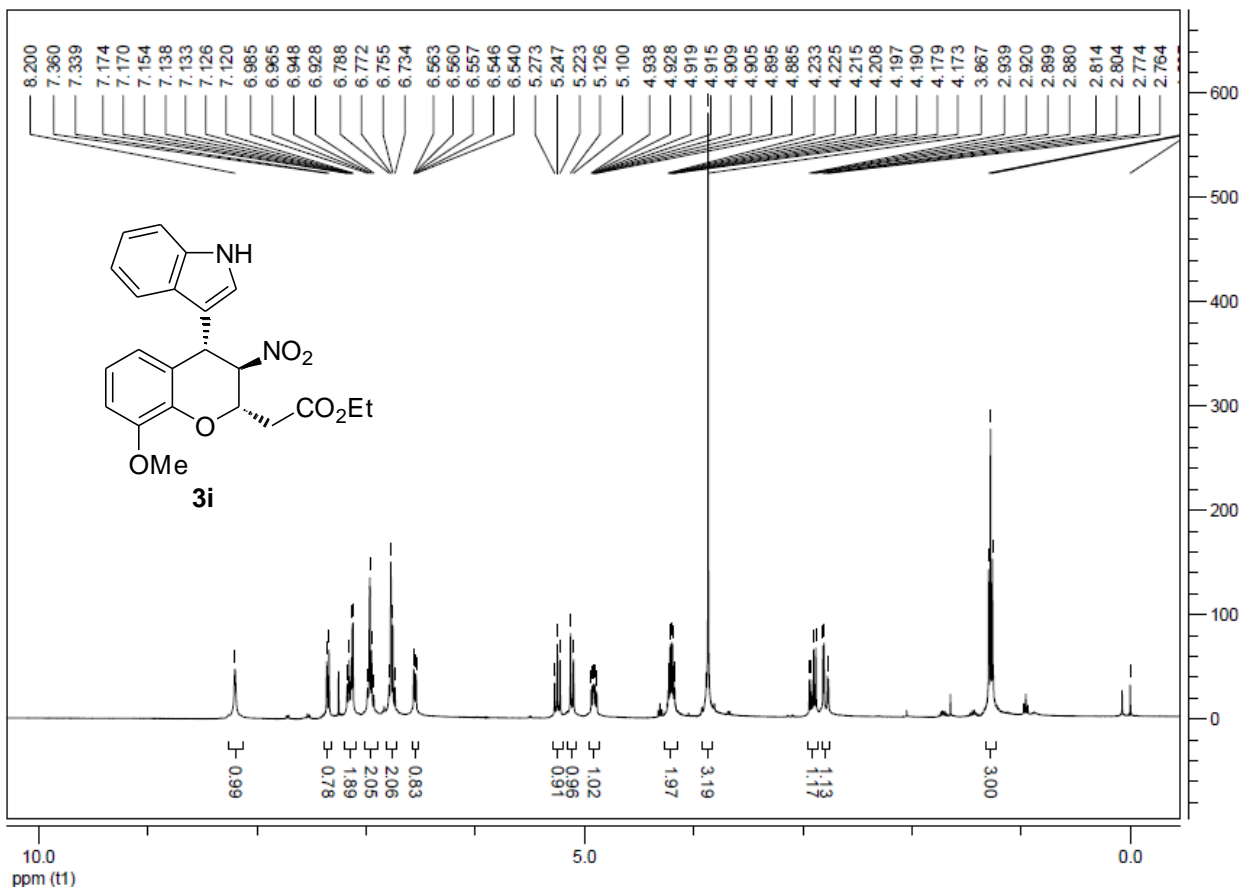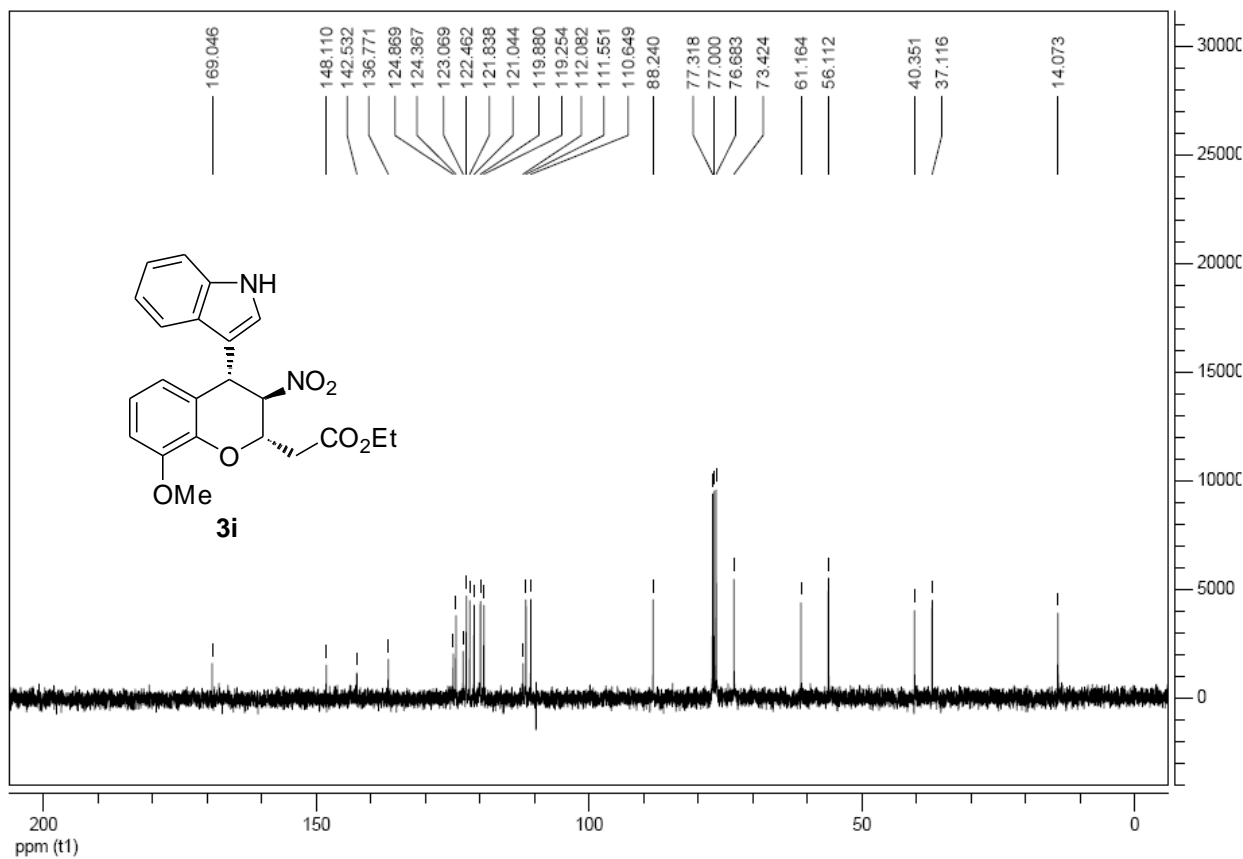

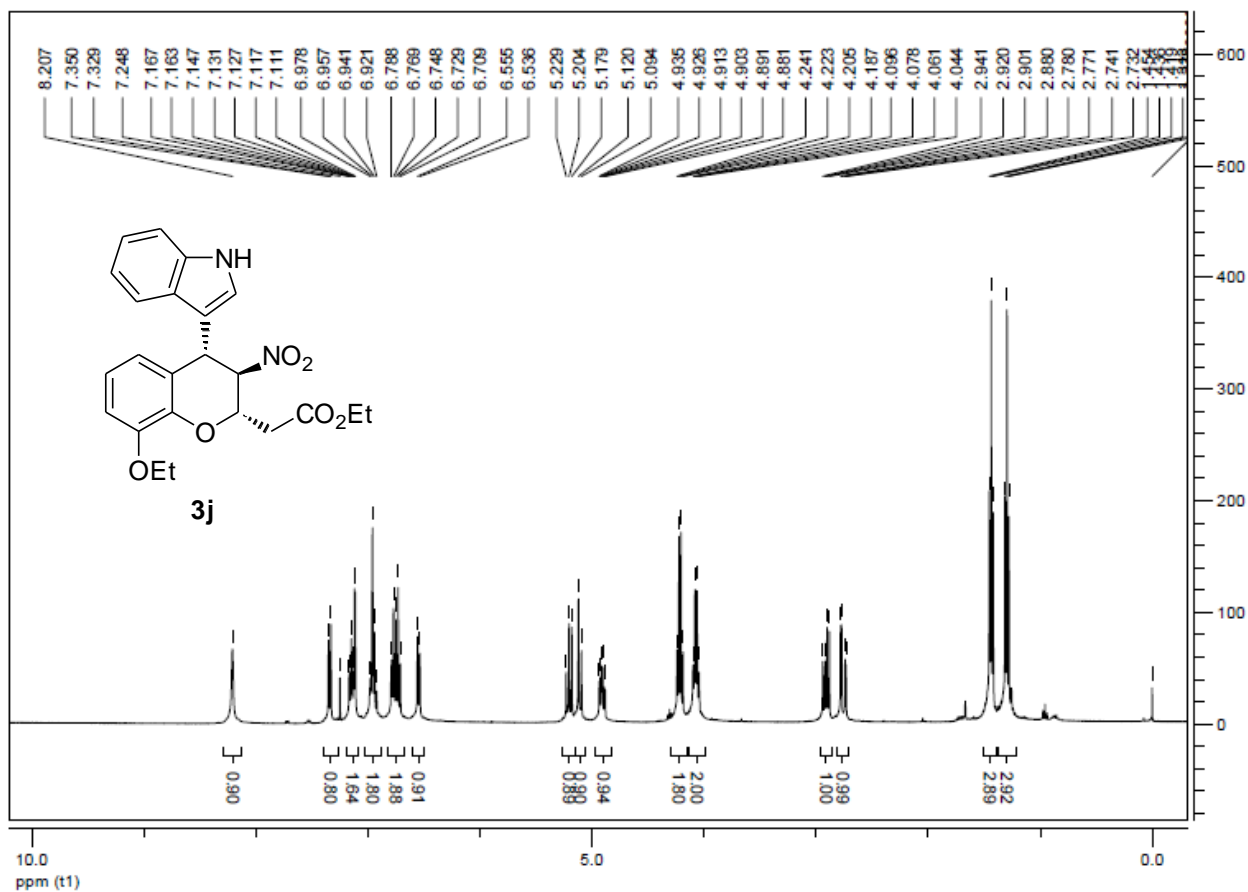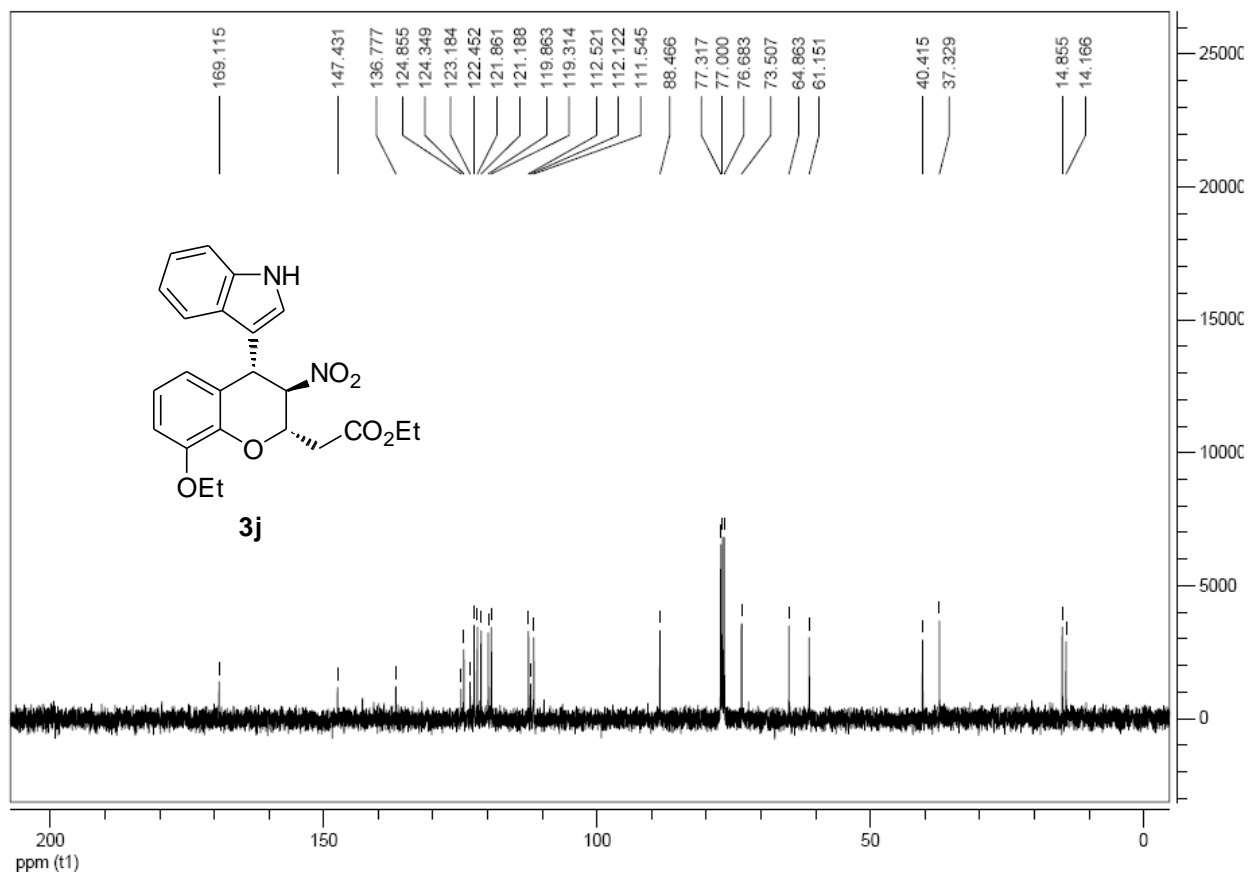

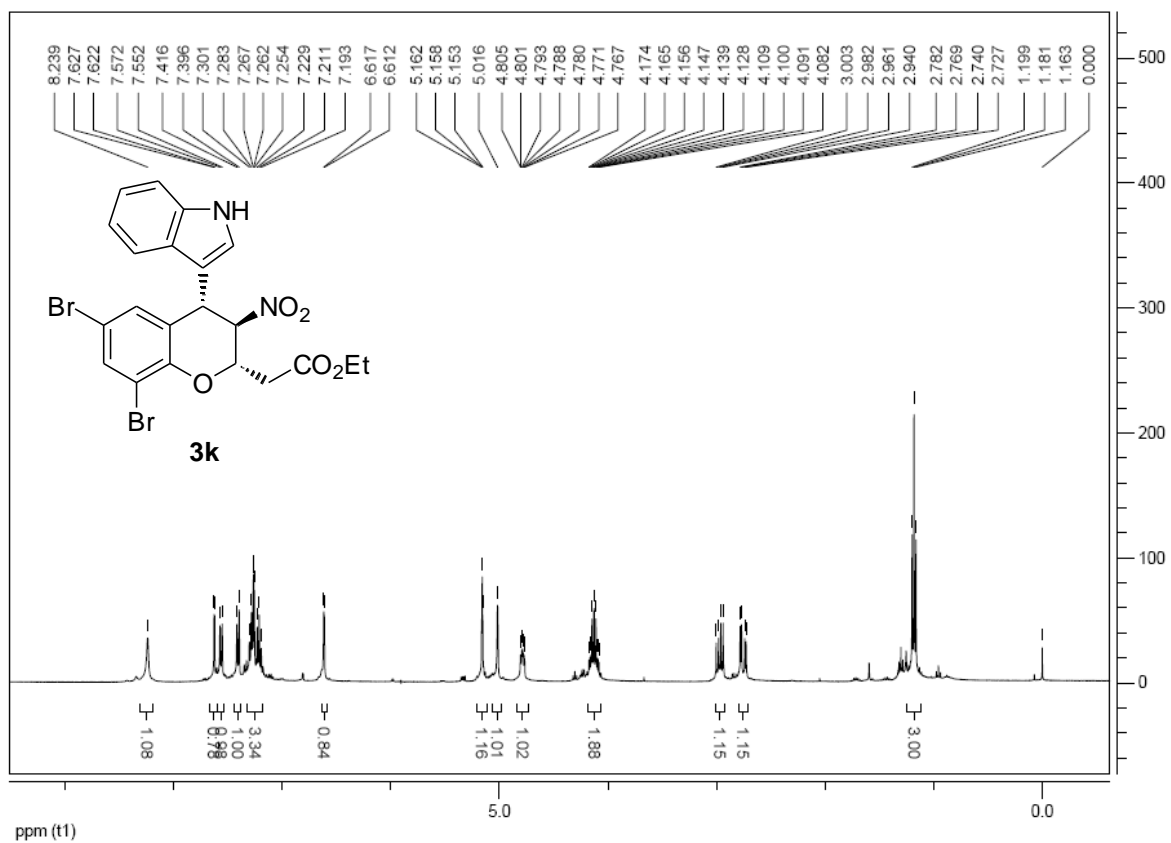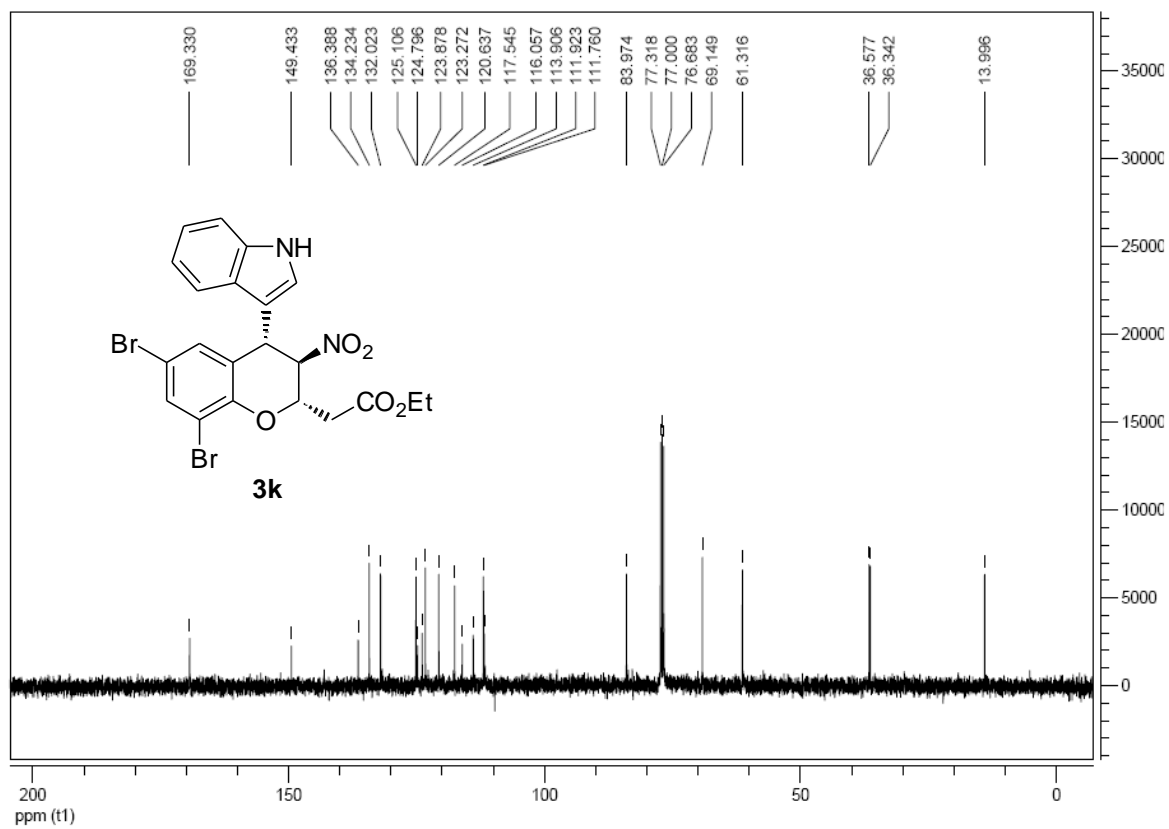

## Copies of HPLC chromatograms of Friedel–Crafts alkylation products 3

### HPLC for general procedure A:

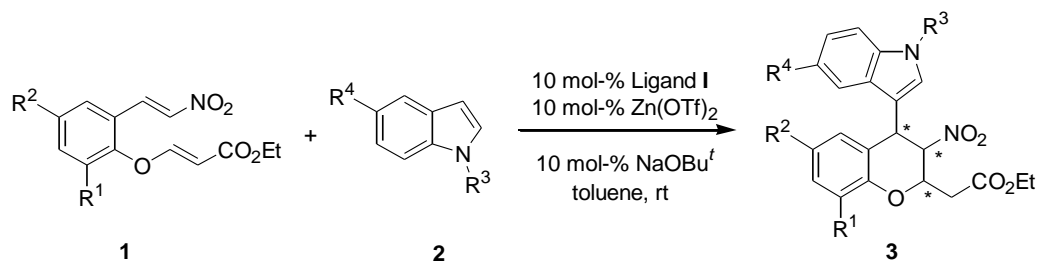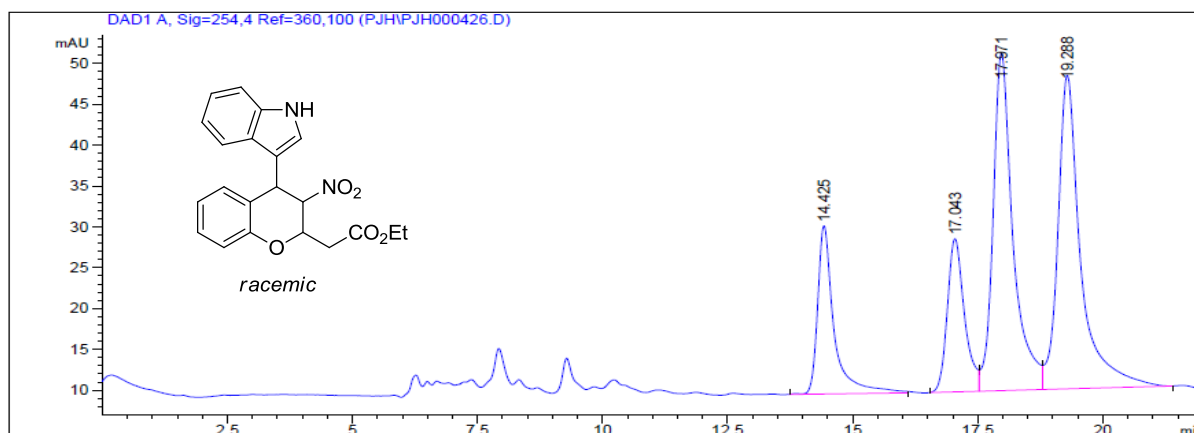

| Peak # | RetTime [min] | Type | Width [min] | Area [mAU*s] | Height [mAU] | Area %  |
|--------|---------------|------|-------------|--------------|--------------|---------|
| 1      | 14.425        | BB   | 0.3348      | 470.94208    | 20.59301     | 14.3463 |
| 2      | 17.043        | BV   | 0.3578      | 446.39096    | 18.74902     | 13.5984 |
| 3      | 17.971        | VV   | 0.4082      | 1147.83350   | 41.30601     | 34.9664 |
| 4      | 19.288        | VB   | 0.4621      | 1217.51172   | 38.37741     | 37.0890 |

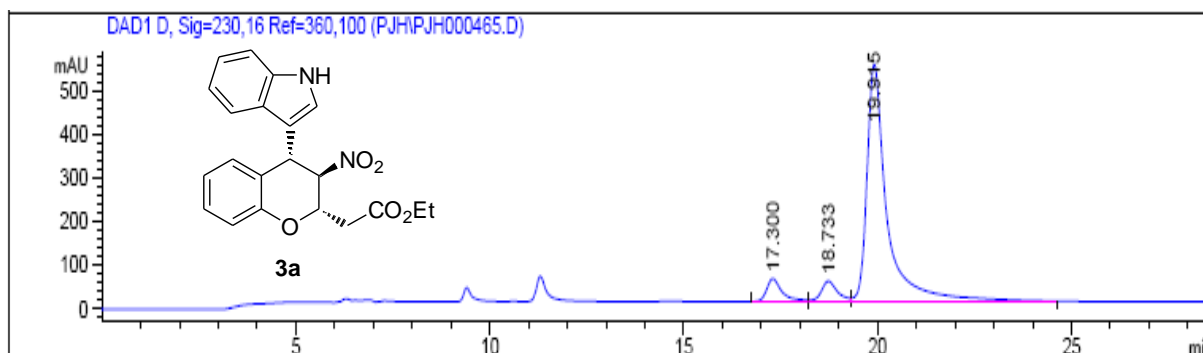

| Peak # | RetTime [min] | Type | Width [min] | Area [mAU*s] | Height [mAU] | Area %  |
|--------|---------------|------|-------------|--------------|--------------|---------|
| 1      | 17.300        | BB   | 0.3808      | 204.86740    | 8.05411      | 4.2582  |
| 2      | 18.733        | BV   | 0.3891      | 261.34995    | 10.26371     | 5.4322  |
| 3      | 19.915        | VB   | 0.4789      | 4344.92334   | 132.39555    | 90.3096 |

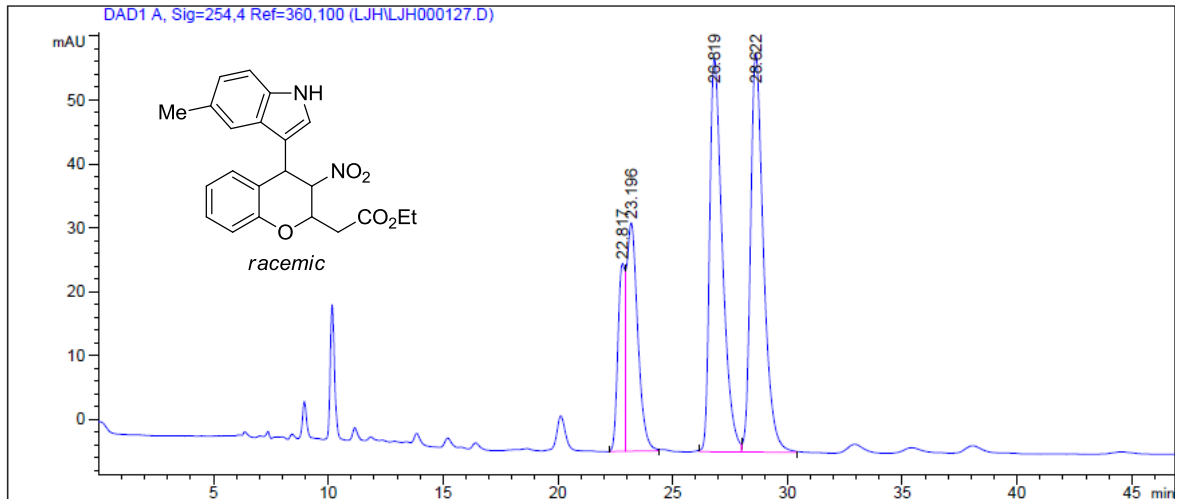

| Peak # | RetTime [min] | Type | Width [min] | Area [mAU*s] | Height [mAU] | Area %  |
|--------|---------------|------|-------------|--------------|--------------|---------|
| 1      | 22.817        | BV   | 0.3231      | 613.68274    | 29.45423     | 9.2343  |
| 2      | 23.196        | VB   | 0.4966      | 1215.54846   | 35.75359     | 18.2908 |
| 3      | 26.819        | BV   | 0.5863      | 2375.89819   | 61.55963     | 35.7511 |
| 4      | 28.622        | VB   | 0.5921      | 2440.53882   | 62.42520     | 36.7238 |

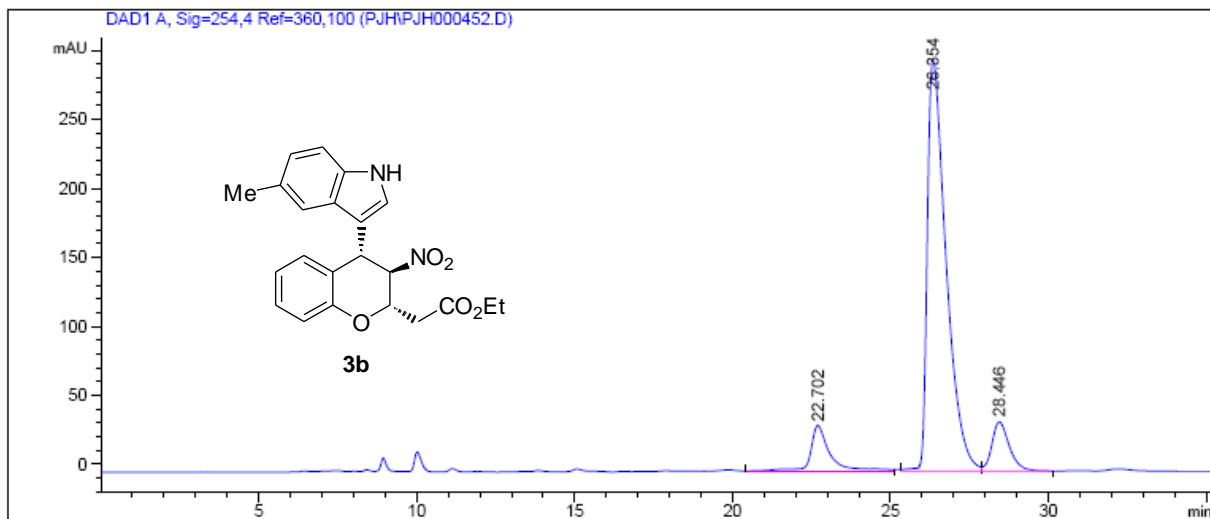

| Peak # | RetTime [min] | Type | Width [min] | Area [mAU*s] | Height [mAU] | Area %  |
|--------|---------------|------|-------------|--------------|--------------|---------|
| 1      | 22.702        | VB   | 0.6327      | 1497.18750   | 33.29017     | 9.8494  |
| 2      | 26.354        | BV   | 0.6173      | 1.23321e4    | 298.94305    | 81.1276 |
| 3      | 28.446        | VB   | 0.5839      | 1371.57043   | 35.72448     | 9.0230  |



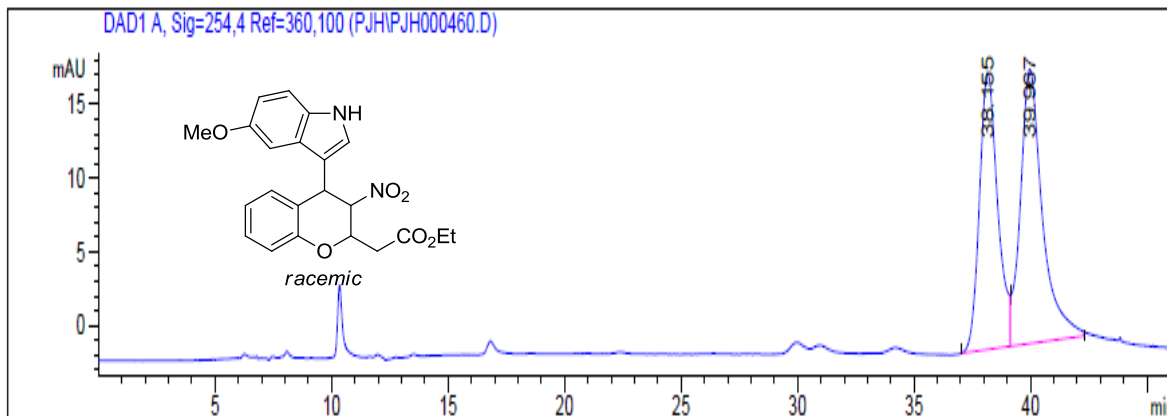

| Peak # | RetTime [min] | Type | Width [min] | Area [mAU*s] | Height [mAU] | Area %  |
|--------|---------------|------|-------------|--------------|--------------|---------|
| 1      | 38.155        | BV   | 0.8164      | 1017.82837   | 18.77684     | 45.2758 |
| 2      | 39.967        | VB   | 0.9472      | 1230.23523   | 18.60975     | 54.7242 |

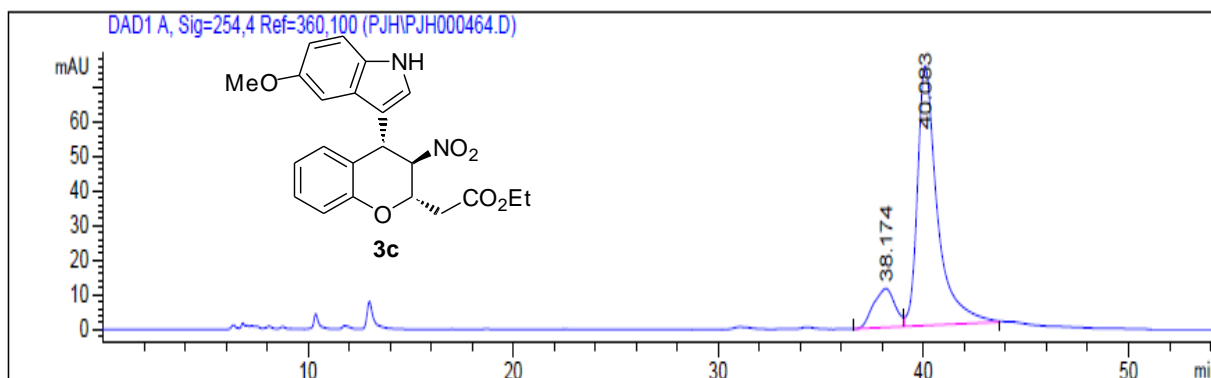

| Peak # | RetTime [min] | Type | Width [min] | Area [mAU*s] | Height [mAU] | Area %  |
|--------|---------------|------|-------------|--------------|--------------|---------|
| 1      | 38.174        | BV   | 0.9971      | 821.18170    | 11.23021     | 13.9044 |
| 2      | 40.083        | VB   | 0.9908      | 5084.72754   | 75.01569     | 86.0956 |

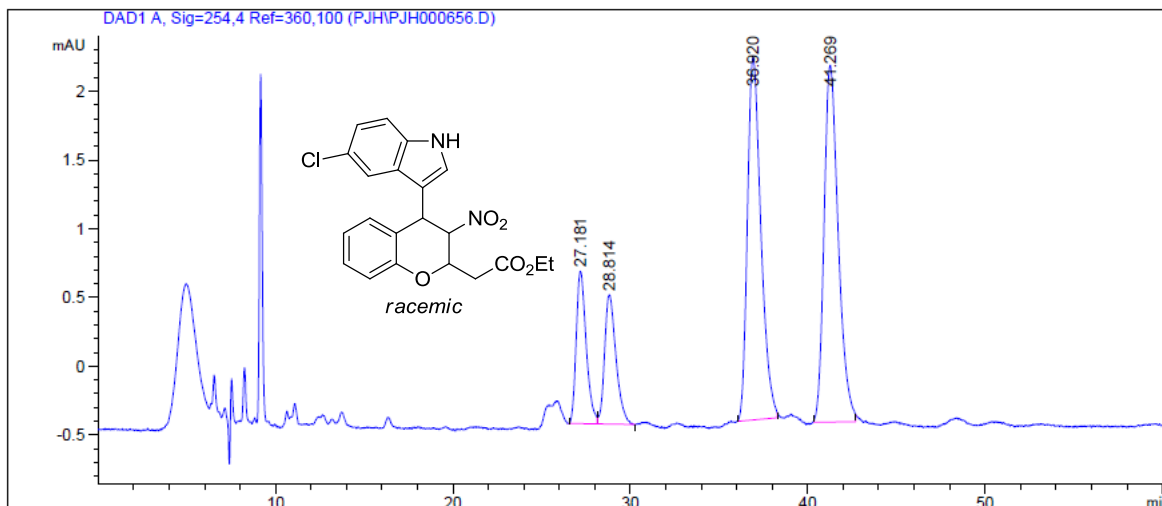

| Peak # | RetTime [min] | Type | Width [min] | Area [mAU*s] | Height [mAU] | Area %  |
|--------|---------------|------|-------------|--------------|--------------|---------|
| 1      | 27.181        | BV   | 0.5521      | 43.28242     | 1.10725      | 11.7468 |
| 2      | 28.814        | VB   | 0.5982      | 42.10659     | 9.40729e-1   | 11.4277 |
| 3      | 36.920        | BB   | 0.7853      | 138.91309    | 2.64237      | 37.7009 |
| 4      | 41.269        | BB   | 0.8198      | 144.15857    | 2.59607      | 39.1245 |

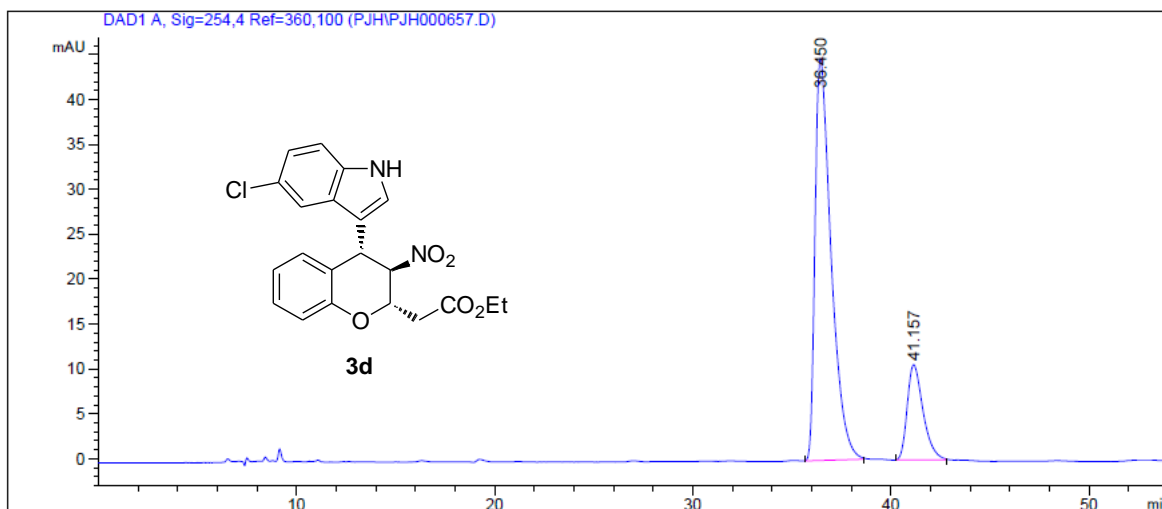

| Peak # | RetTime [min] | Type | Width [min] | Area [mAU*s] | Height [mAU] | Area %  |
|--------|---------------|------|-------------|--------------|--------------|---------|
| 1      | 36.450        | BB   | 0.8414      | 2522.50000   | 44.76487     | 81.0962 |
| 2      | 41.157        | BB   | 0.8193      | 588.00244    | 10.59714     | 18.9038 |

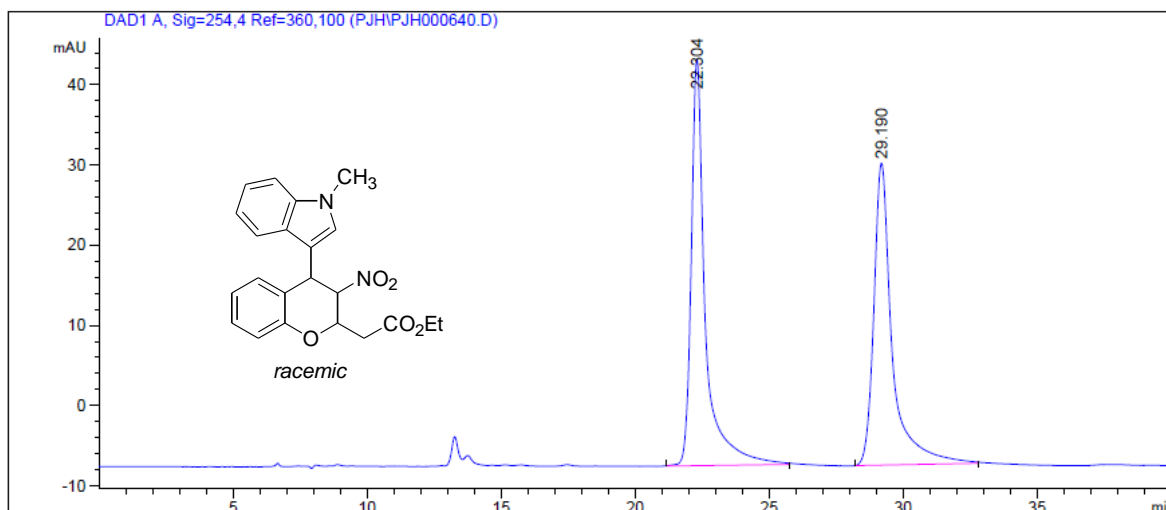

| Peak # | RetTime [min] | Type | Width [min] | Area [mAU*s] | Height [mAU] | Area %  |
|--------|---------------|------|-------------|--------------|--------------|---------|
| 1      | 22.304        | BB   | 0.5271      | 1856.25916   | 50.70624     | 50.7742 |
| 2      | 29.190        | BB   | 0.6971      | 1799.64893   | 37.68553     | 49.2258 |

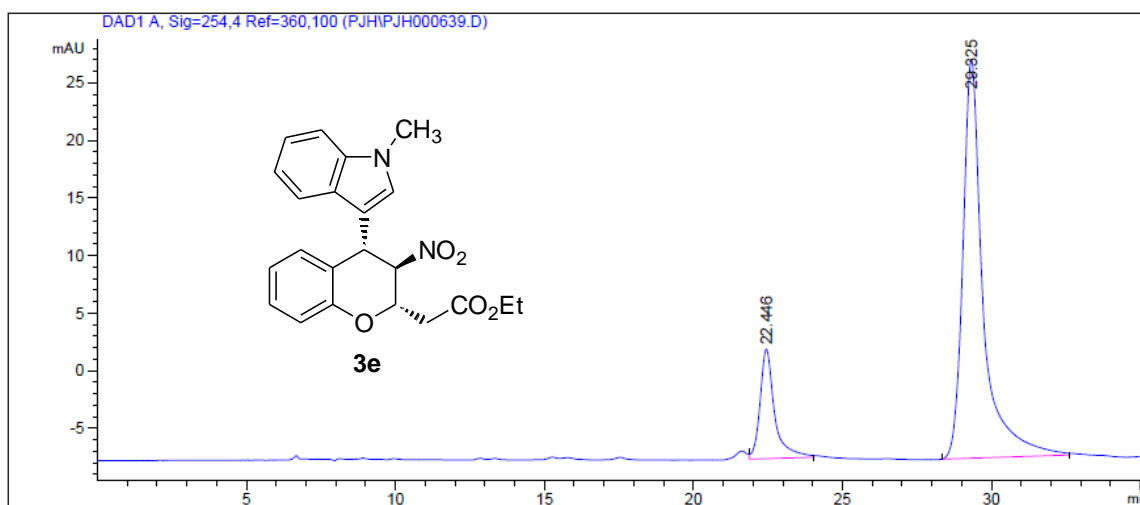

| Peak # | RetTime [min] | Type | Width [min] | Area [mAU*s] | Height [mAU] | Area %  |
|--------|---------------|------|-------------|--------------|--------------|---------|
| 1      | 22.446        | VB   | 0.4973      | 323.63562    | 9.50392      | 16.5062 |
| 2      | 29.325        | BB   | 0.6878      | 1637.05017   | 34.61126     | 83.4938 |

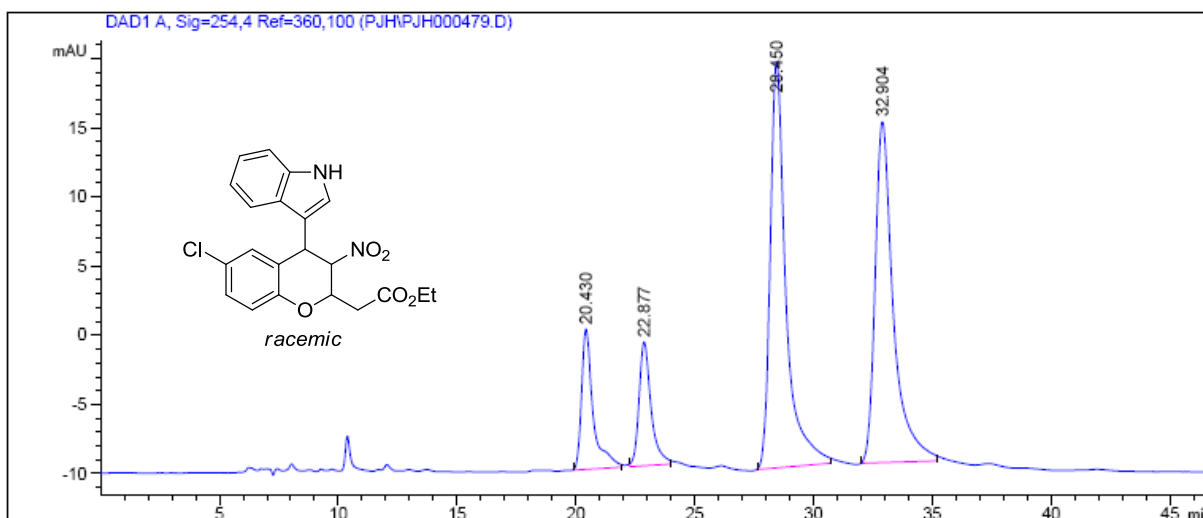

| Peak # | RetTime [min] | Type | Width [min] | Area [mAU*s] | Height [mAU] | Area %  |
|--------|---------------|------|-------------|--------------|--------------|---------|
| 1      | 20.430        | BB   | 0.4955      | 343.98013    | 10.14562     | 10.3510 |
| 2      | 22.877        | BB   | 0.5273      | 315.23315    | 8.94243      | 9.4860  |
| 3      | 28.450        | BB   | 0.6762      | 1349.34094   | 29.35835     | 40.6043 |
| 4      | 32.904        | BB   | 0.7865      | 1314.59058   | 24.63610     | 39.5586 |

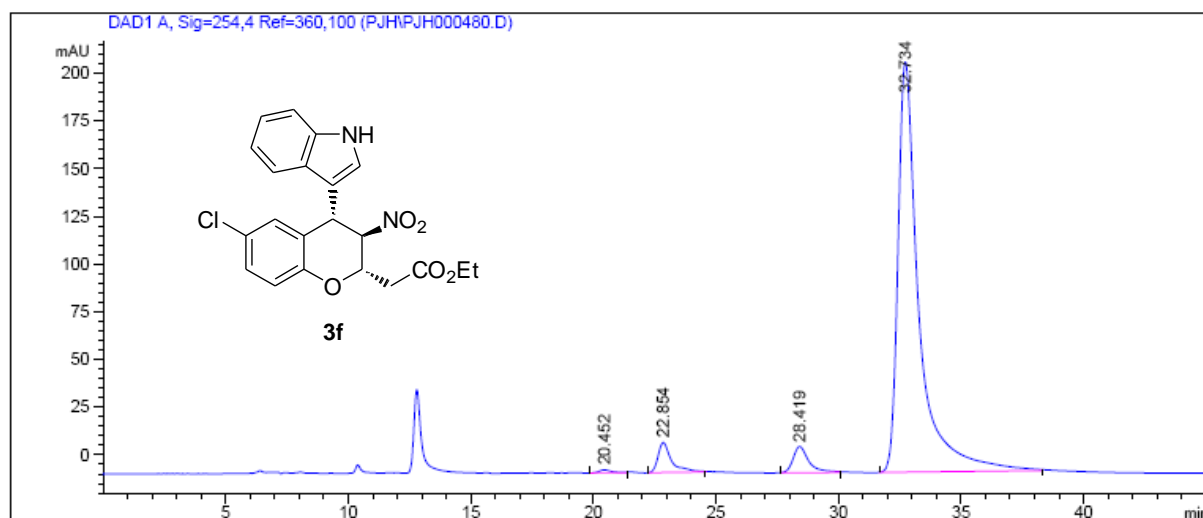

| Peak # | RetTime [min] | Type | Width [min] | Area [mAU*s] | Height [mAU] | Area %  |
|--------|---------------|------|-------------|--------------|--------------|---------|
| 1      | 20.452        | BB   | 0.5064      | 53.41059     | 1.58008      | 0.3784  |
| 2      | 22.854        | BB   | 0.5630      | 609.21869    | 15.75852     | 4.3156  |
| 3      | 28.419        | BB   | 0.6640      | 610.86908    | 13.70481     | 4.3273  |
| 4      | 32.734        | BB   | 0.8688      | 1.28432e4    | 215.03745    | 90.9788 |

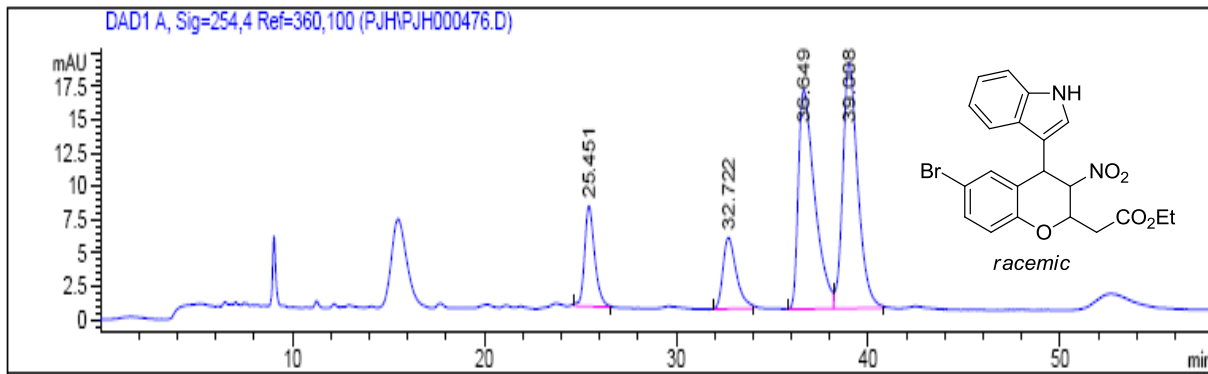

| Peak # | RetTime [min] | Type | Width [min] | Area [mAU*s] | Height [mAU] | Area %  |
|--------|---------------|------|-------------|--------------|--------------|---------|
| 1      | 25.451        | BB   | 0.5600      | 276.43765    | 7.53563      | 10.9628 |
| 2      | 32.722        | BB   | 0.7307      | 259.29739    | 5.33794      | 10.2831 |
| 3      | 36.649        | BV   | 0.8989      | 979.20367    | 16.43908     | 38.8328 |
| 4      | 39.008        | VB   | 0.8221      | 1006.64923   | 18.52100     | 39.9212 |

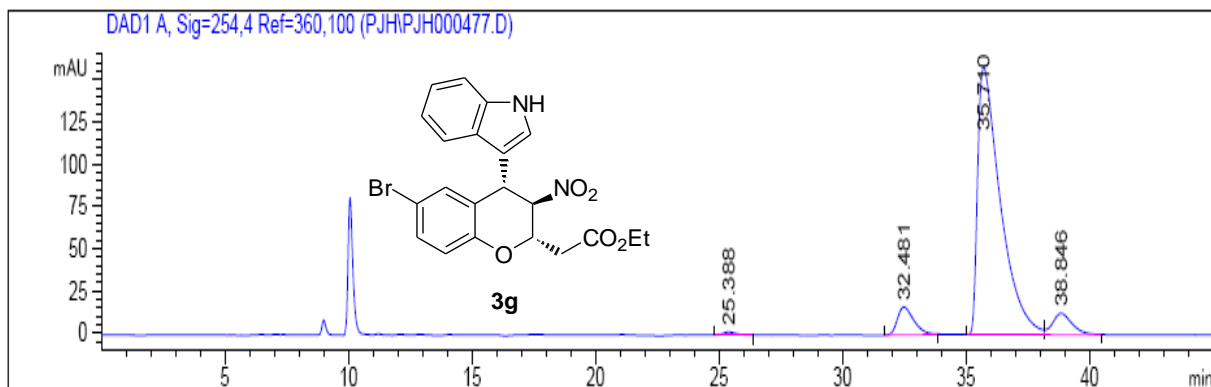

| Peak # | RetTime [min] | Type | Width [min] | Area [mAU*s] | Height [mAU] | Area %  |
|--------|---------------|------|-------------|--------------|--------------|---------|
| 1      | 25.388        | BB   | 0.5063      | 63.38261     | 1.76761      | 0.5450  |
| 2      | 32.481        | BB   | 0.7015      | 764.64581    | 16.47381     | 6.5744  |
| 3      | 35.710        | BV   | 0.9203      | 1.01006e4    | 158.32646    | 86.8442 |
| 4      | 38.846        | VB   | 0.8342      | 702.08453    | 12.59846     | 6.0365  |

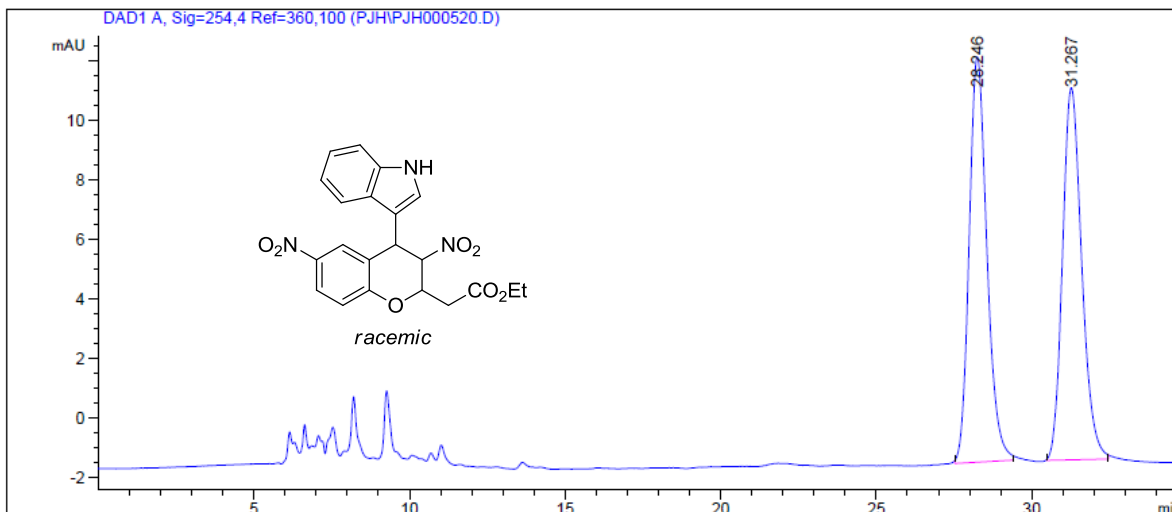

| Peak # | RetTime [min] | Type | Width [min] | Area [mAU*s] | Height [mAU] | Area %  |
|--------|---------------|------|-------------|--------------|--------------|---------|
| 1      | 28.246        | BB   | 0.6059      | 538.32477    | 13.59794     | 50.1577 |
| 2      | 31.267        | BB   | 0.6560      | 534.94037    | 12.48315     | 49.8423 |

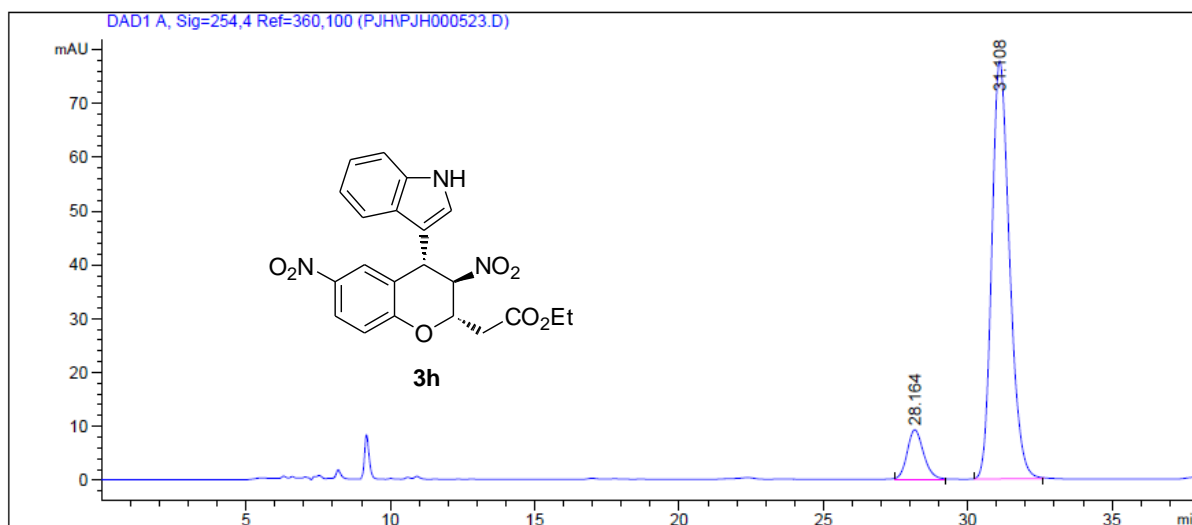

| Peak # | RetTime [min] | Type | Width [min] | Area [mAU*s] | Height [mAU] | Area %  |
|--------|---------------|------|-------------|--------------|--------------|---------|
| 1      | 28.164        | BB   | 0.5974      | 359.86734    | 9.17875      | 9.7714  |
| 2      | 31.108        | BB   | 0.6592      | 3322.99829   | 77.65696     | 90.2286 |

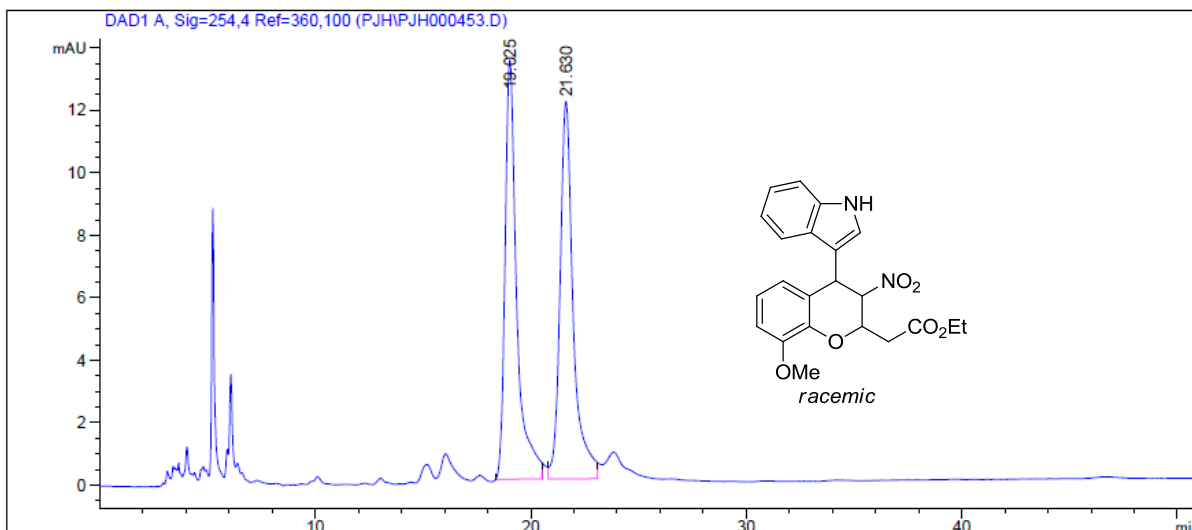

| Peak # | RetTime [min] | Type | Width [min] | Area [mAU*s] | Height [mAU] | Area %  |
|--------|---------------|------|-------------|--------------|--------------|---------|
| 1      | 19.025        | BB   | 0.5542      | 504.31268    | 13.42552     | 49.5421 |
| 2      | 21.630        | BB   | 0.6277      | 513.63428    | 12.08769     | 50.4579 |

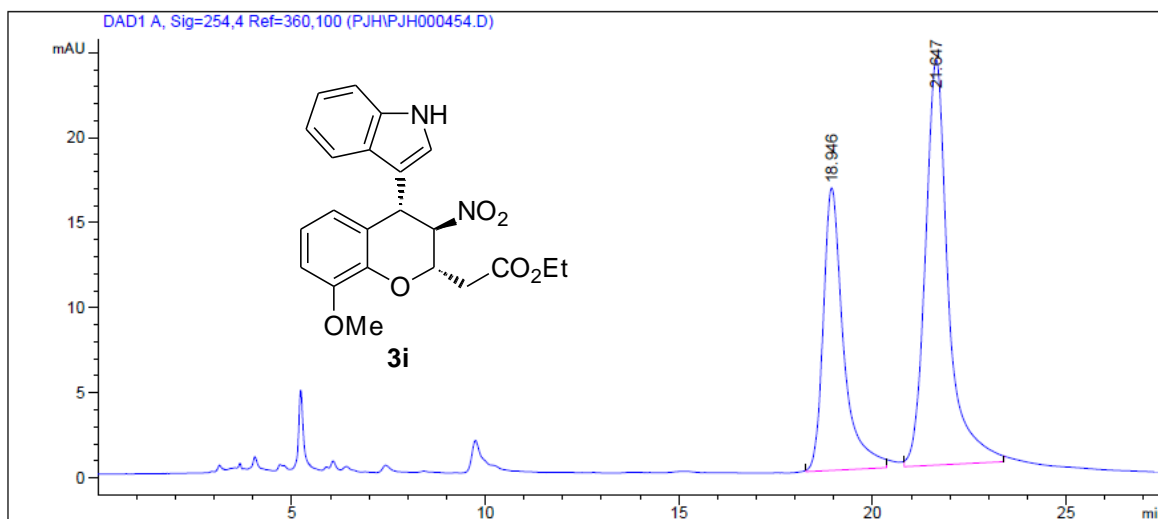

| Peak # | RetTime [min] | Type | Width [min] | Area [mAU*s] | Height [mAU] | Area %  |
|--------|---------------|------|-------------|--------------|--------------|---------|
| 1      | 18.946        | BB   | 0.5387      | 601.94592    | 16.61307     | 37.9814 |
| 2      | 21.647        | BB   | 0.6132      | 982.89618    | 23.82914     | 62.0186 |

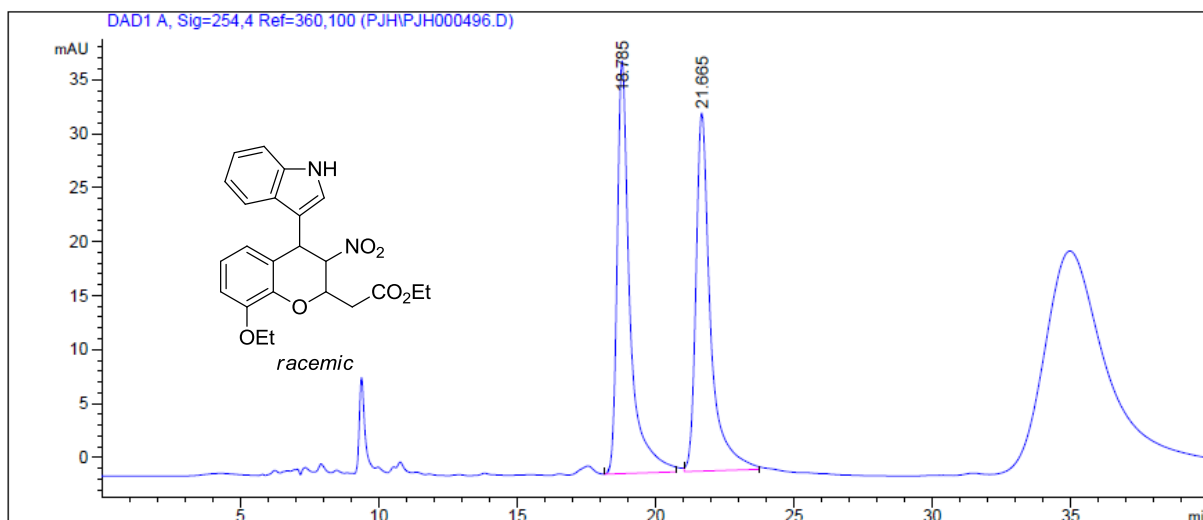

| Peak # | RetTime [min] | Type | Width [min] | Area [mAU*s] | Height [mAU] | Area %  |
|--------|---------------|------|-------------|--------------|--------------|---------|
| 1      | 18.785        | VB   | 0.4666      | 1227.09937   | 38.21683     | 50.3271 |
| 2      | 21.665        | BB   | 0.5338      | 1211.14795   | 33.18376     | 49.6729 |

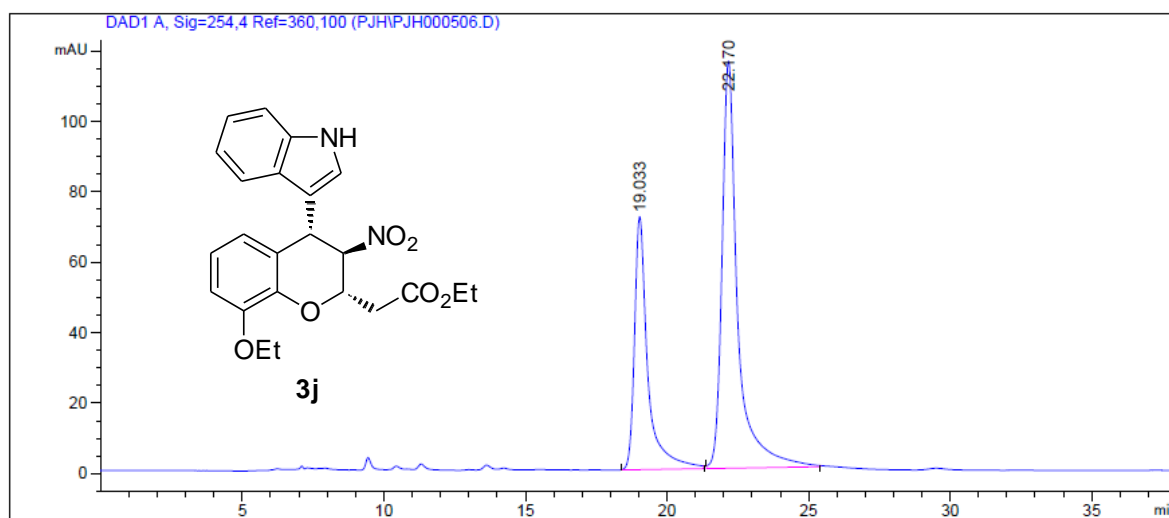

| Peak # | RetTime [min] | Type | Width [min] | Area [mAU*s] | Height [mAU] | Area %  |
|--------|---------------|------|-------------|--------------|--------------|---------|
| 1      | 19.033        | BB   | 0.4772      | 2345.41577   | 71.77733     | 34.5454 |
| 2      | 22.170        | BB   | 0.5608      | 4443.96289   | 115.52087    | 65.4546 |



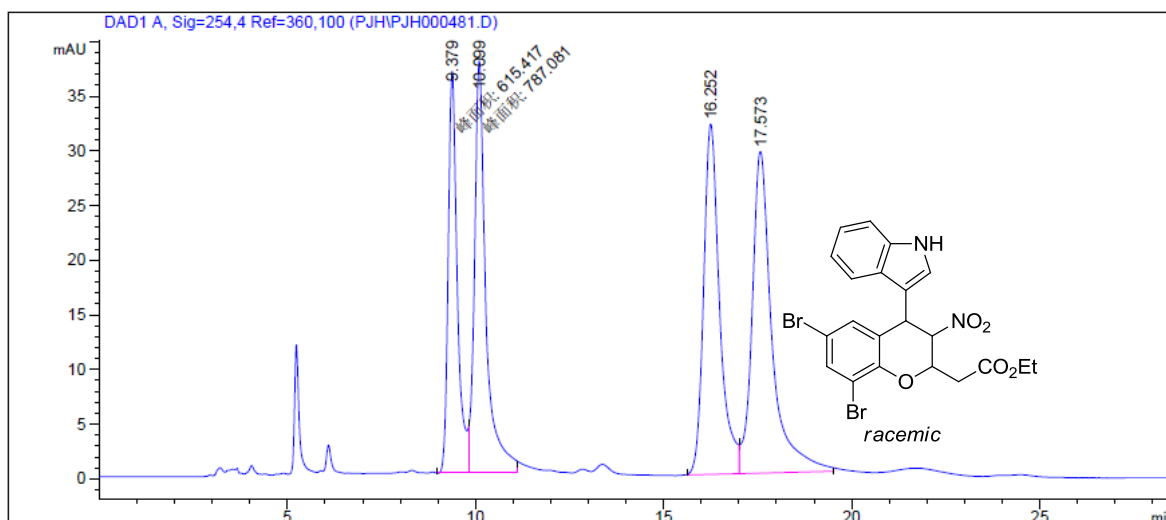

| Peak # | RetTime [min] | Type | Width [min] | Area [mAU*s] | Height [mAU] | Area %  |
|--------|---------------|------|-------------|--------------|--------------|---------|
| 1      | 9.379         | MM   | 0.2796      | 615.41724    | 36.67808     | 17.9115 |
| 2      | 10.099        | MM   | 0.3484      | 787.08063    | 37.64749     | 22.9077 |
| 3      | 16.252        | BV   | 0.4450      | 948.49451    | 32.07032     | 27.6056 |
| 4      | 17.573        | VB   | 0.5379      | 1084.88025   | 29.44399     | 31.5751 |

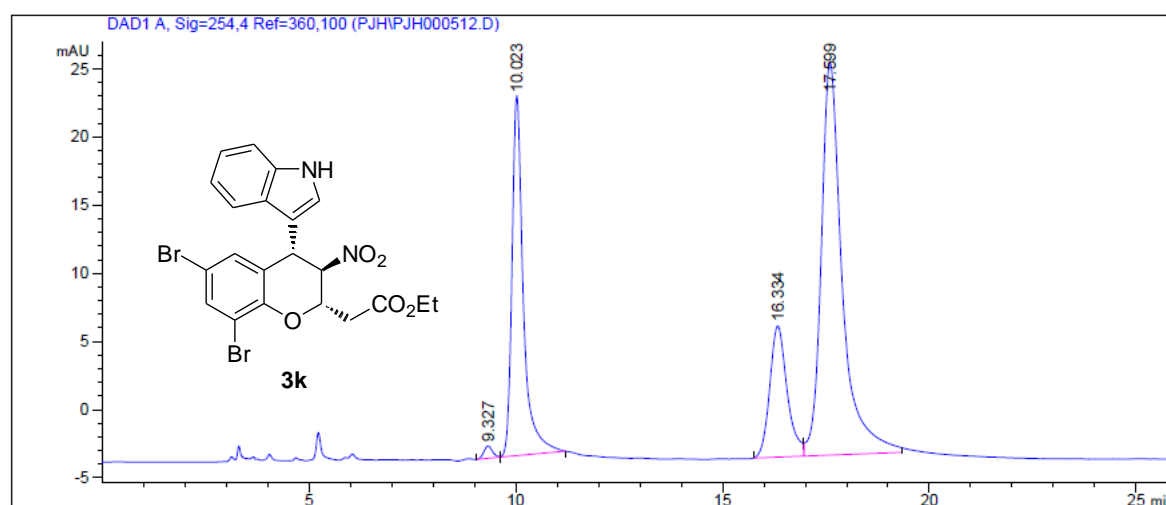

| Peak # | RetTime [min] | Type | Width [min] | Area [mAU*s] | Height [mAU] | Area %  |
|--------|---------------|------|-------------|--------------|--------------|---------|
| 1      | 9.327         | BV S | 0.2200      | 12.97383     | 9.01080e-1   | 0.7131  |
| 2      | 10.023        | VB S | 0.2824      | 503.13354    | 26.39430     | 27.6550 |
| 3      | 16.334        | BV   | 0.4416      | 281.95447    | 9.62871      | 15.4978 |
| 4      | 17.599        | VB   | 0.5259      | 1021.25946   | 28.78873     | 56.1341 |

## HPLC for general procedure B:

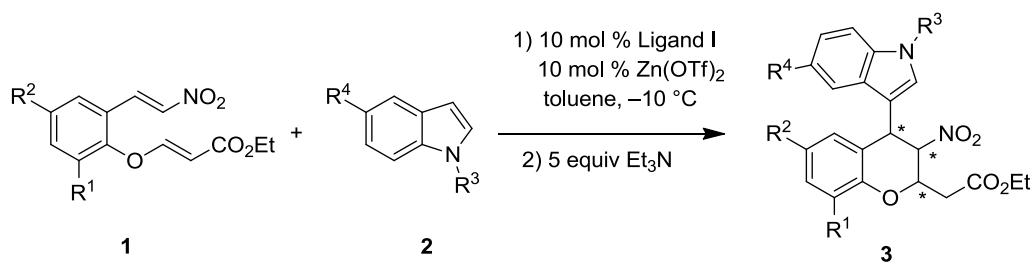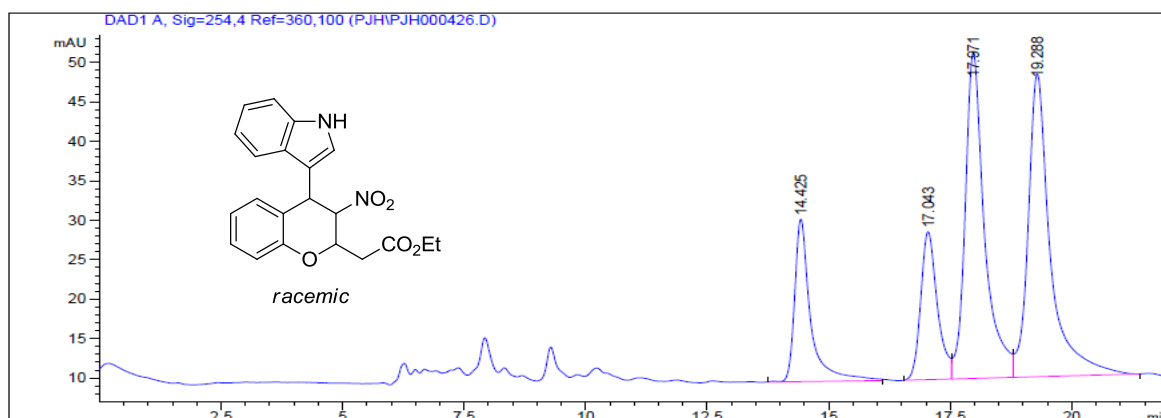

| Peak # | RetTime [min] | Type | Width [min] | Area [mAU*s] | Height [mAU] | Area %  |
|--------|---------------|------|-------------|--------------|--------------|---------|
| 1      | 14.425        | BB   | 0.3348      | 470.94208    | 20.59301     | 14.3463 |
| 2      | 17.043        | BV   | 0.3578      | 446.39096    | 18.74902     | 13.5984 |
| 3      | 17.971        | VV   | 0.4082      | 1147.83350   | 41.30601     | 34.9664 |
| 4      | 19.288        | VB   | 0.4621      | 1217.51172   | 38.37741     | 37.0890 |

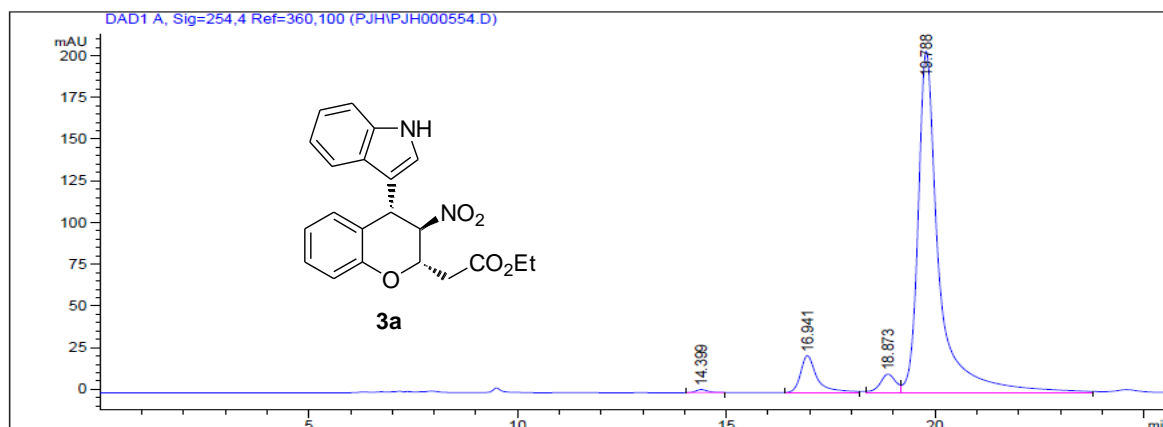

| Peak # | RetTime [min] | Type | Width [min] | Area [mAU*s] | Height [mAU] | Area %  |
|--------|---------------|------|-------------|--------------|--------------|---------|
| 1      | 14.399        | BB   | 0.3060      | 37.47469     | 1.83684      | 0.4644  |
| 2      | 16.941        | BB   | 0.4024      | 612.50964    | 22.16479     | 7.5908  |
| 3      | 18.873        | BV   | 0.3882      | 288.42459    | 11.06204     | 3.5744  |
| 4      | 19.788        | VB   | 0.5028      | 7130.74170   | 204.49789    | 88.3704 |

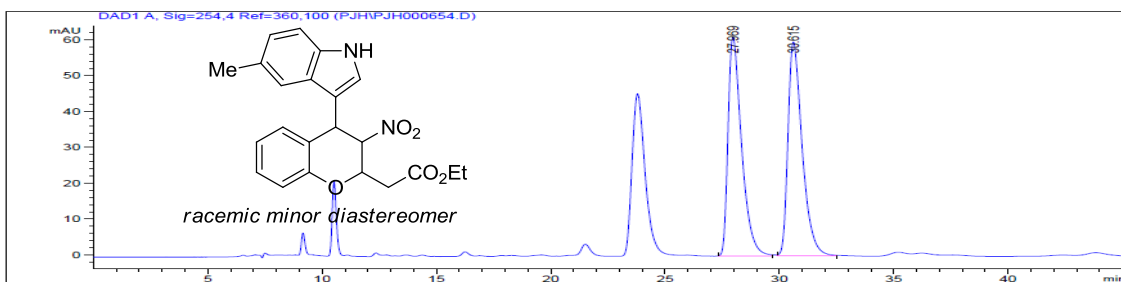

| Peak # | RetTime [min] | Type | Width [min] | Area [mAU*s] | Height [mAU] | Area %  |
|--------|---------------|------|-------------|--------------|--------------|---------|
| 1      | 27.969        | BB   | 0.6207      | 2516.91699   | 61.08672     | 49.3982 |
| 2      | 30.615        | BB   | 0.6520      | 2578.23779   | 59.68681     | 50.6018 |

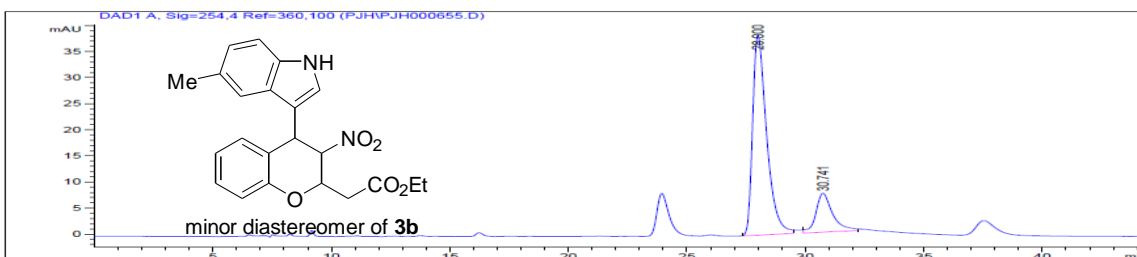

| Peak # | RetTime [min] | Type | Width [min] | Area [mAU*s] | Height [mAU] | Area %  |
|--------|---------------|------|-------------|--------------|--------------|---------|
| 1      | 28.000        | BB   | 0.6187      | 1573.56995   | 38.34930     | 81.0979 |
| 2      | 30.741        | BB   | 0.7213      | 366.76266    | 7.46397      | 18.9021 |

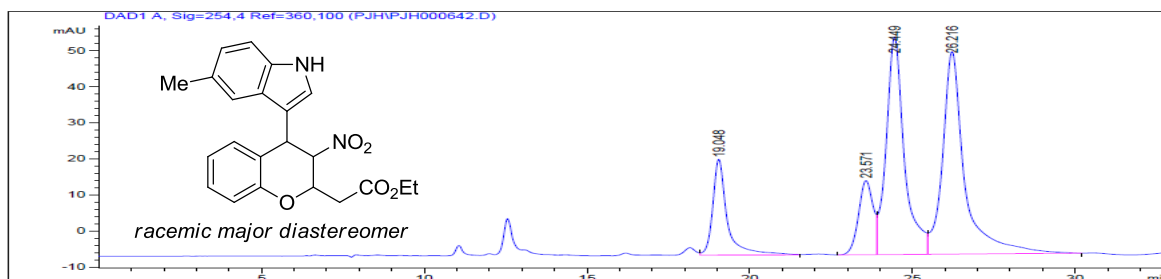

| Peak # | RetTime [min] | Type | Width [min] | Area [mAU*s] | Height [mAU] | Area %  |
|--------|---------------|------|-------------|--------------|--------------|---------|
| 1      | 19.048        | VB   | 0.4509      | 825.65344    | 26.54324     | 12.7752 |
| 2      | 23.571        | VV   | 0.4725      | 640.87122    | 20.51011     | 9.9161  |
| 3      | 24.449        | VV   | 0.5700      | 2344.78638   | 60.26061     | 36.2806 |
| 4      | 26.216        | VB   | 0.6755      | 2651.61792   | 56.09292     | 41.0281 |

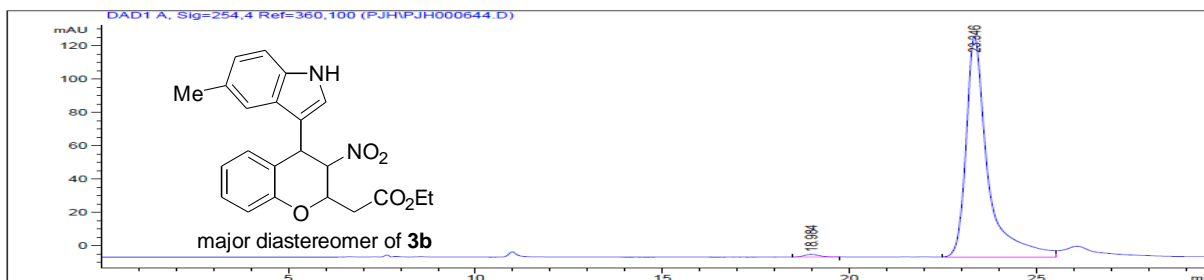

| Peak # | RetTime [min] | Type | Width [min] | Area [mAU*s] | Height [mAU] | Area %  |
|--------|---------------|------|-------------|--------------|--------------|---------|
| 1      | 18.984        | BB   | 0.4179      | 44.85406     | 1.62584      | 0.8390  |
| 2      | 23.346        | BV   | 0.5798      | 5301.20850   | 132.19774    | 99.1610 |

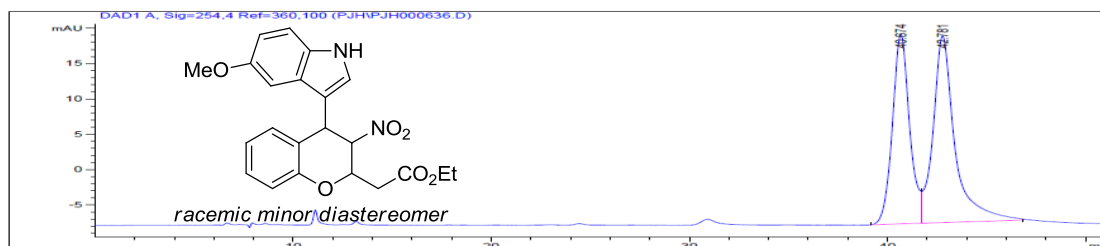

| Peak # | RetTime [min] | Type | Width [min] | Area [mAU*s] | Height [mAU] | Area %  |
|--------|---------------|------|-------------|--------------|--------------|---------|
| 1      | 40.674        | BV   | 0.9110      | 1618.65234   | 26.86332     | 44.3716 |
| 2      | 42.781        | VB   | 1.1007      | 2029.29077   | 26.40225     | 55.6284 |

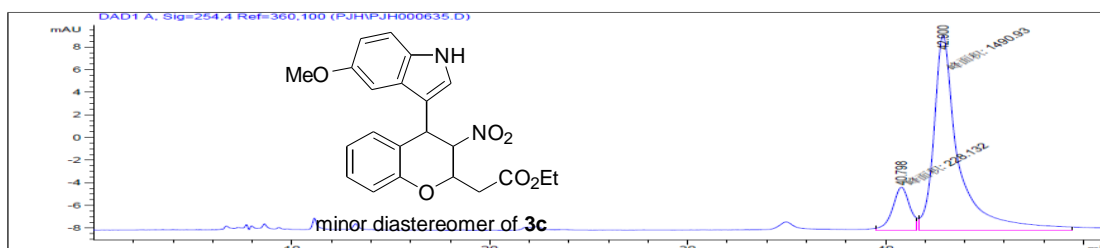

| Peak # | RetTime [min] | Type | Width [min] | Area [mAU*s] | Height [mAU] | Area %  |
|--------|---------------|------|-------------|--------------|--------------|---------|
| 1      | 40.798        | MM   | 1.0038      | 228.13240    | 3.78784      | 13.2707 |
| 2      | 42.900        | MM   | 1.4420      | 1490.93433   | 17.23179     | 86.7293 |

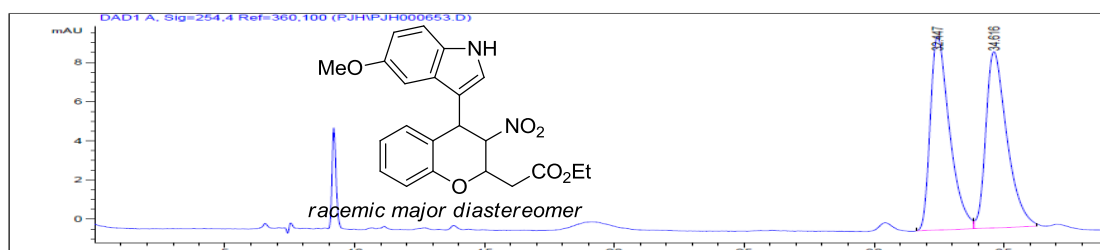

| Peak # | RetTime [min] | Type | Width [min] | Area [mAU*s] | Height [mAU] | Area %  |
|--------|---------------|------|-------------|--------------|--------------|---------|
| 1      | 32.447        | BV   | 0.7725      | 511.92172    | 9.87965      | 50.1833 |
| 2      | 34.616        | VB   | 0.8355      | 508.18140    | 8.99018      | 49.8167 |

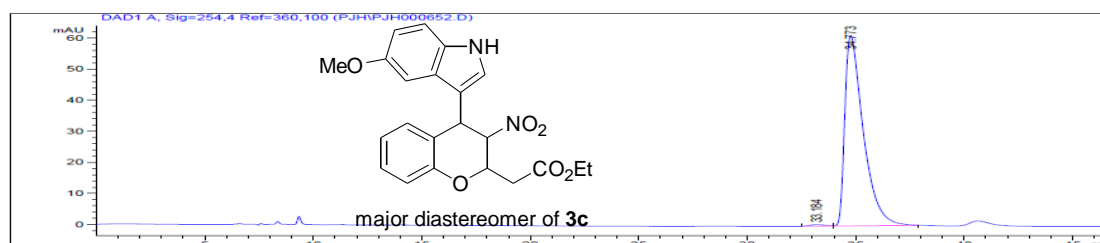

| Peak # | RetTime [min] | Type | Width [min] | Area [mAU*s] | Height [mAU] | Area %  |
|--------|---------------|------|-------------|--------------|--------------|---------|
| 1      | 33.184        | BV   | 0.5506      | 23.04489     | 5.00999e-1   | 0.6309  |
| 2      | 34.773        | VB   | 0.8853      | 3629.72974   | 61.26010     | 99.3691 |

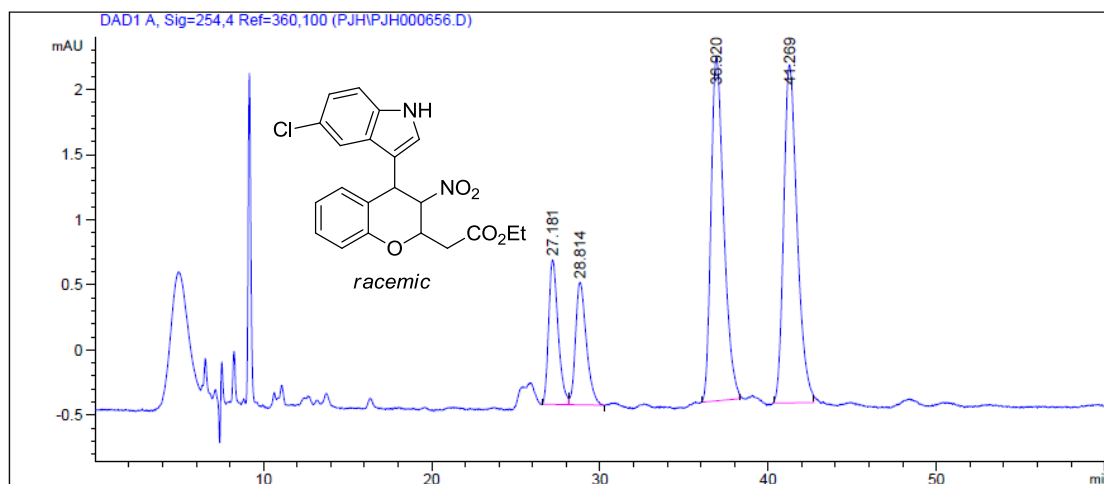

| Peak # | RetTime [min] | Type | Width [min] | Area [mAU*s] | Height [mAU] | Area %  |
|--------|---------------|------|-------------|--------------|--------------|---------|
| 1      | 27.181        | BV   | 0.5521      | 43.28242     | 1.10725      | 11.7468 |
| 2      | 28.814        | VB   | 0.5982      | 42.10659     | 9.40729e-1   | 11.4277 |
| 3      | 36.920        | BB   | 0.7853      | 138.91309    | 2.64237      | 37.7009 |
| 4      | 41.269        | BB   | 0.8198      | 144.15857    | 2.59607      | 39.1245 |

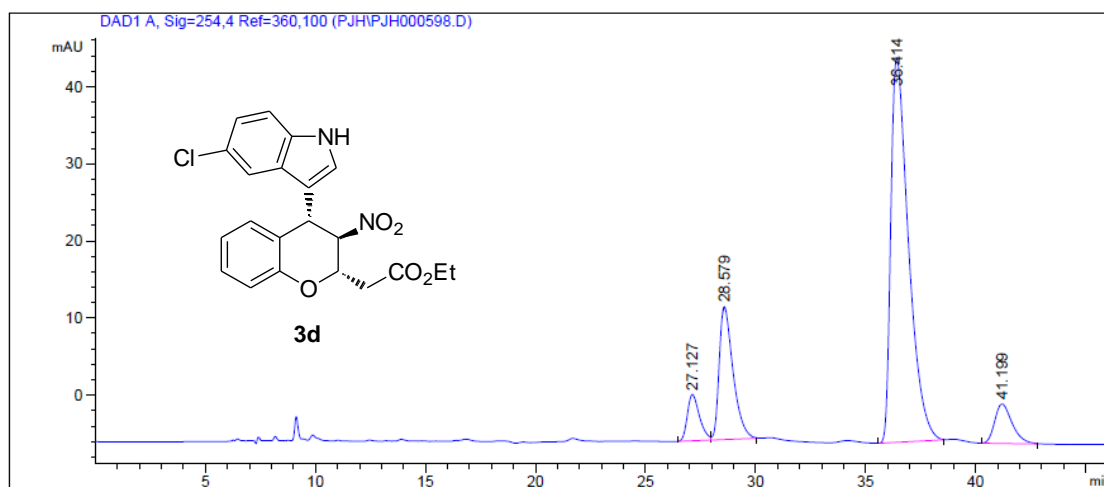

| Peak # | RetTime [min] | Type | Width [min] | Area [mAU*s] | Height [mAU] | Area %  |
|--------|---------------|------|-------------|--------------|--------------|---------|
| 1      | 27.127        | BV   | 0.5724      | 228.35405    | 5.99471      | 5.6419  |
| 2      | 28.579        | VB   | 0.6583      | 753.54620    | 17.22746     | 18.6176 |
| 3      | 36.414        | BB   | 0.8476      | 2783.51733   | 49.84023     | 68.7715 |
| 4      | 41.199        | BB   | 0.8107      | 282.07034    | 5.12024      | 6.9690  |

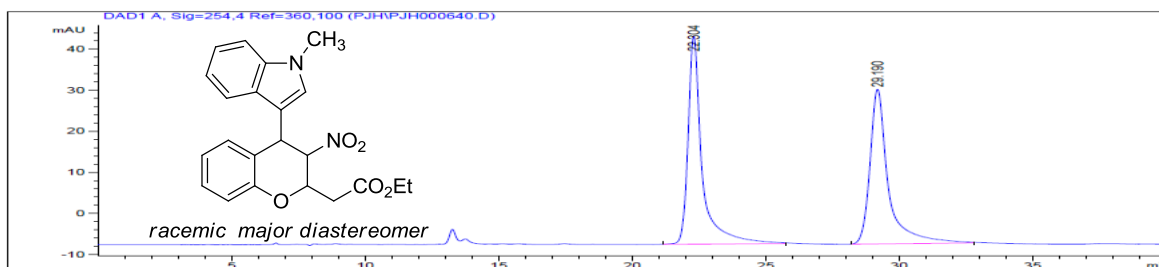

| Peak # | RetTime [min] | Type | Width [min] | Area [mAU*s] | Height [mAU] | Area %  |
|--------|---------------|------|-------------|--------------|--------------|---------|
| 1      | 22.304        | BB   | 0.5271      | 1856.25916   | 50.70624     | 50.7742 |
| 2      | 29.190        | BB   | 0.6971      | 1799.64893   | 37.68553     | 49.2258 |

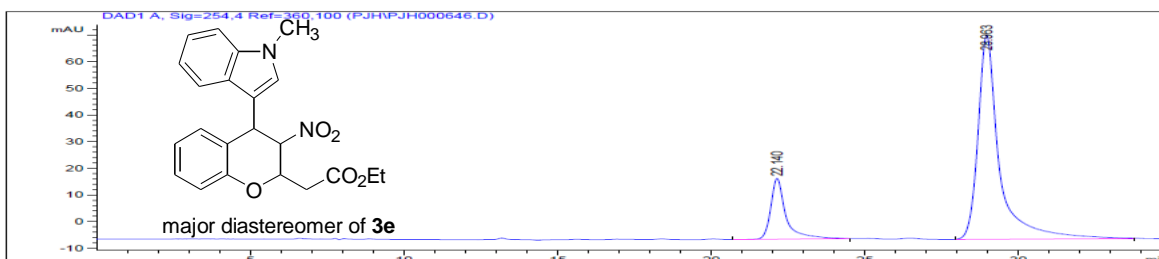

| Peak # | RetTime [min] | Type | Width [min] | Area [mAU*s] | Height [mAU] | Area %  |
|--------|---------------|------|-------------|--------------|--------------|---------|
| 1      | 22.140        | VB   | 0.5027      | 786.53900    | 22.78428     | 17.4382 |
| 2      | 28.963        | BB   | 0.7042      | 3723.89355   | 76.46532     | 82.5618 |

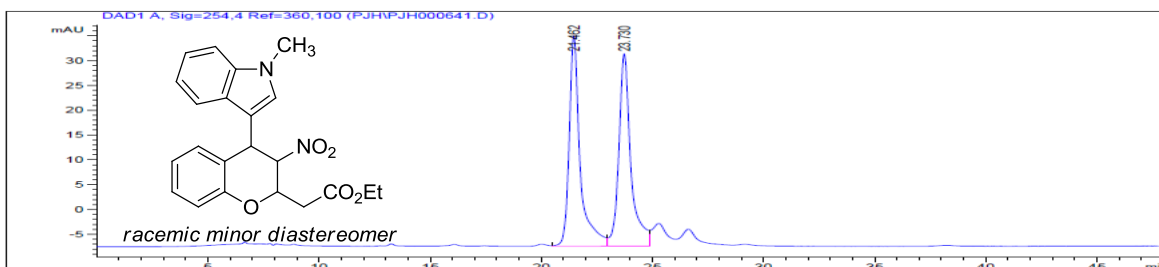

| Peak # | RetTime [min] | Type | Width [min] | Area [mAU*s] | Height [mAU] | Area %  |
|--------|---------------|------|-------------|--------------|--------------|---------|
| 1      | 21.462        | VV   | 0.4957      | 1452.49719   | 42.39354     | 49.9138 |
| 2      | 23.730        | VV   | 0.5507      | 1457.51196   | 38.76280     | 50.0862 |

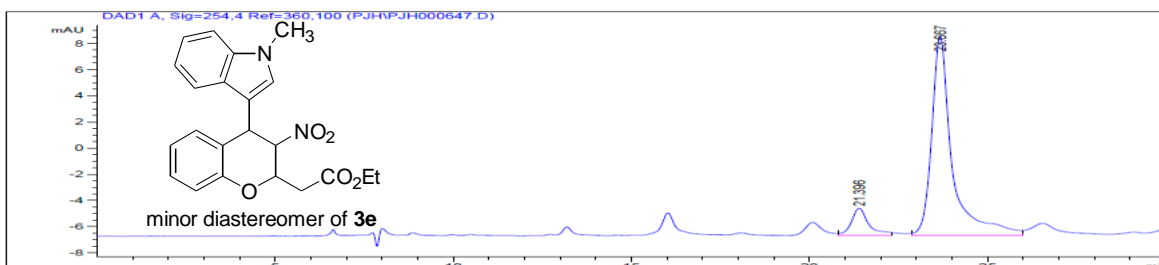

| Peak # | RetTime [min] | Type | Width [min] | Area [mAU*s] | Height [mAU] | Area %  |
|--------|---------------|------|-------------|--------------|--------------|---------|
| 1      | 21.396        | VB   | 0.4954      | 70.22806     | 2.07194      | 10.3365 |
| 2      | 23.667        | BB   | 0.5745      | 609.18811    | 15.23444     | 89.6635 |

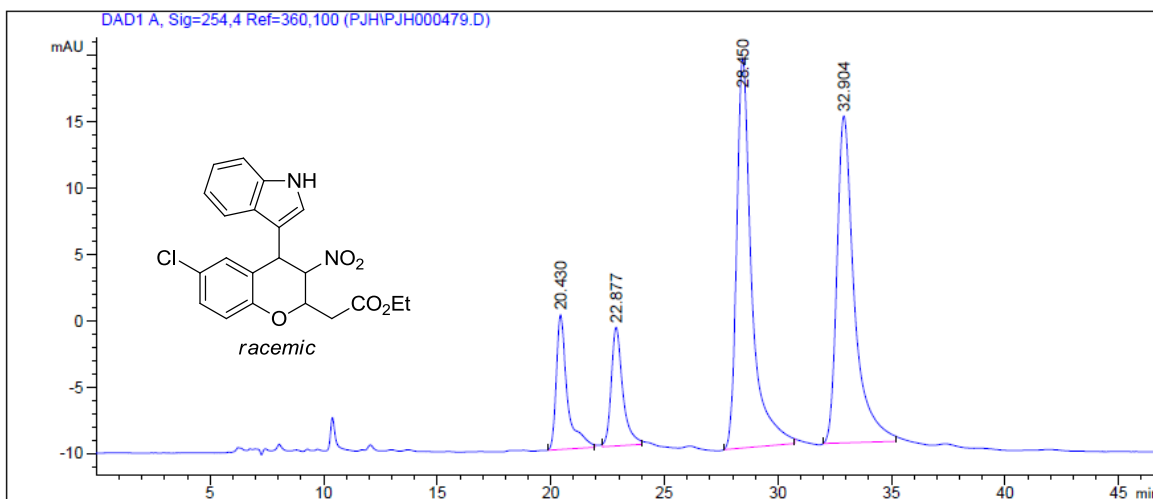

| Peak # | RetTime [min] | Type | Width [min] | Area [mAU*s] | Height [mAU] | Area %  |
|--------|---------------|------|-------------|--------------|--------------|---------|
| 1      | 20.430        | BB   | 0.4955      | 343.98013    | 10.14562     | 10.3510 |
| 2      | 22.877        | BB   | 0.5273      | 315.23315    | 8.94243      | 9.4860  |
| 3      | 28.450        | BB   | 0.6762      | 1349.34094   | 29.35835     | 40.6043 |
| 4      | 32.904        | BB   | 0.7865      | 1314.59058   | 24.63610     | 39.5586 |

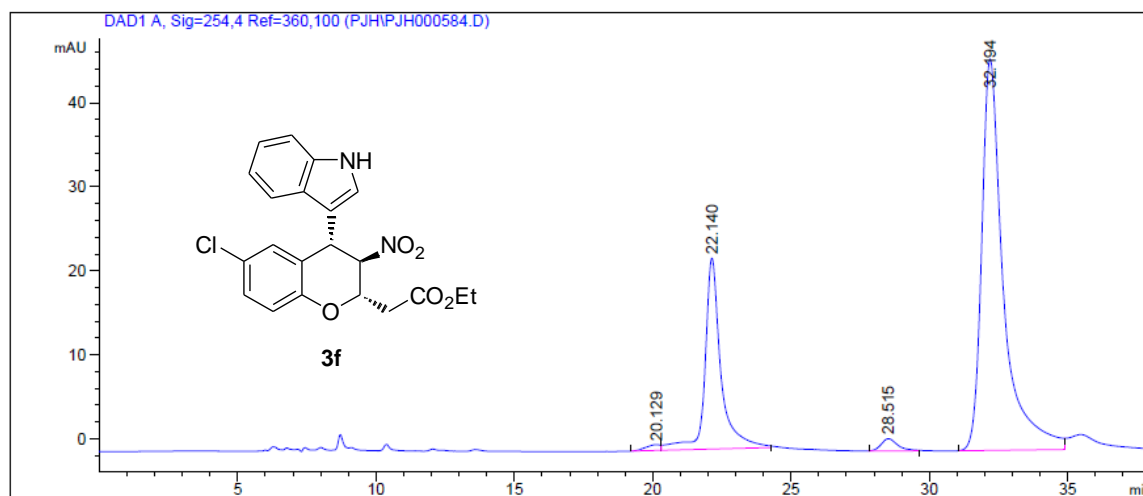

| Peak # | RetTime [min] | Type | Width [min] | Area [mAU*s] | Height [mAU] | Area %  |
|--------|---------------|------|-------------|--------------|--------------|---------|
| 1      | 20.129        | BV   | 0.4537      | 24.46895     | 6.83407e-1   | 0.6895  |
| 2      | 22.140        | VB   | 0.5822      | 915.72150    | 22.72285     | 25.8042 |
| 3      | 28.515        | BB   | 0.6125      | 59.56060     | 1.44629      | 1.6784  |
| 4      | 32.194        | BB   | 0.8024      | 2548.98413   | 46.58105     | 71.8280 |

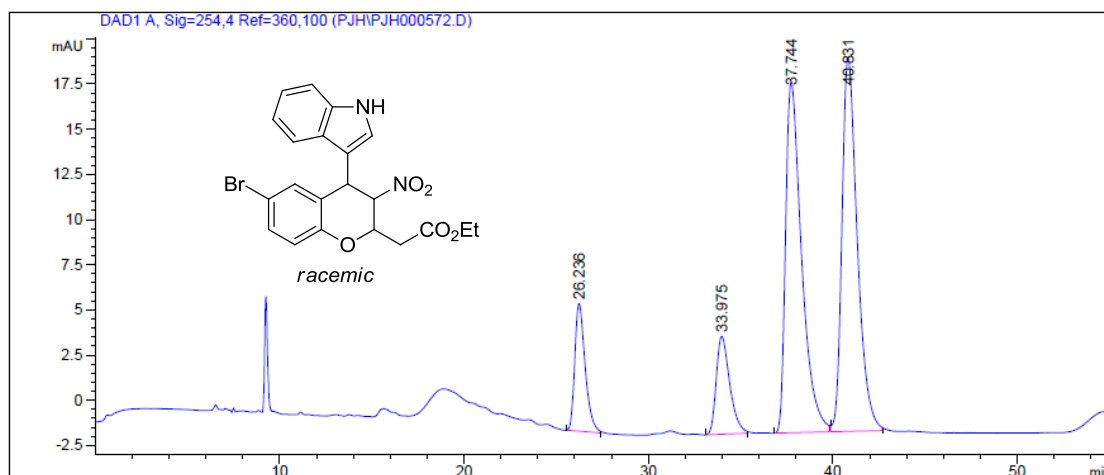

| Peak # | RetTime [min] | Type | Width [min] | Area [mAU*s] | Height [mAU] | Area %  |
|--------|---------------|------|-------------|--------------|--------------|---------|
| 1      | 26.236        | BB   | 0.5927      | 276.12054    | 7.05343      | 9.4728  |
| 2      | 33.975        | BB   | 0.7685      | 275.09558    | 5.41643      | 9.4377  |
| 3      | 37.744        | BB   | 0.8948      | 1169.99939   | 19.42315     | 40.1390 |
| 4      | 40.831        | BB   | 0.8686      | 1193.65100   | 20.70538     | 40.9505 |

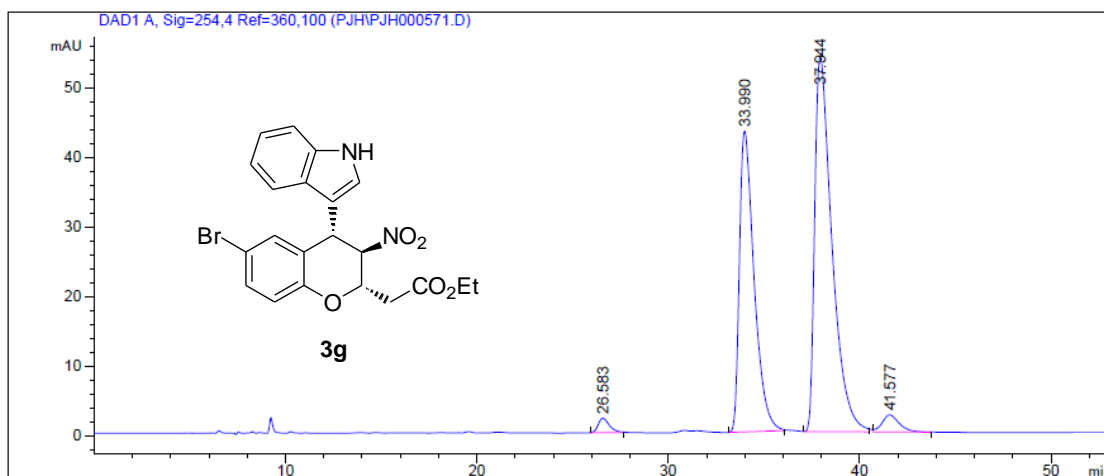

| Peak # | RetTime [min] | Type | Width [min] | Area [mAU*s] | Height [mAU] | Area %  |
|--------|---------------|------|-------------|--------------|--------------|---------|
| 1      | 26.583        | BB   | 0.5809      | 84.89101     | 2.09442      | 1.4342  |
| 2      | 33.990        | BB   | 0.8011      | 2304.80957   | 43.29633     | 38.9378 |
| 3      | 37.944        | BB   | 0.9349      | 3375.88086   | 53.88437     | 57.0327 |
| 4      | 41.577        | BB   | 0.8428      | 153.62460    | 2.43924      | 2.5954  |



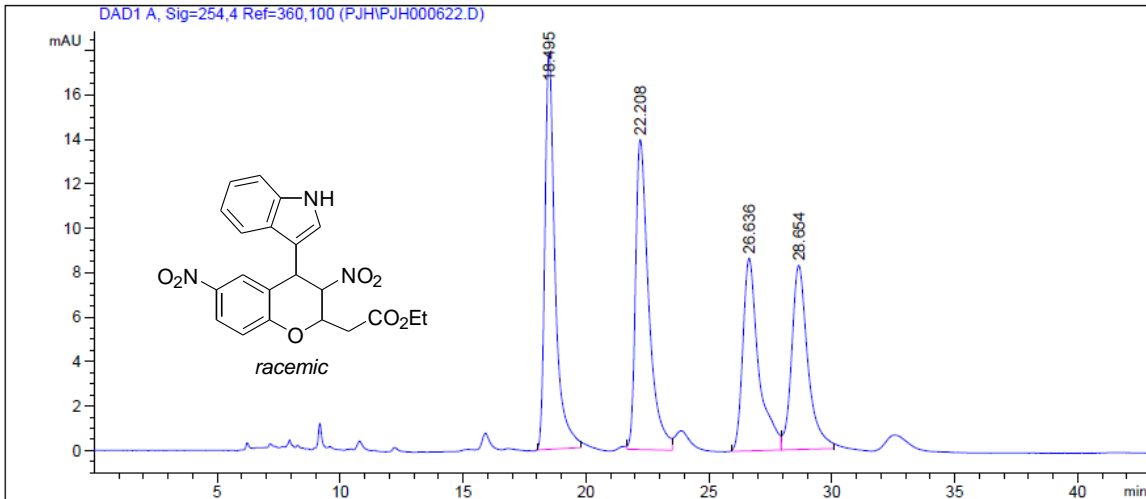

| Peak # | RetTime [min] | Type | Width [min] | Area [mAU*s] | Height [mAU] | Area %  |
|--------|---------------|------|-------------|--------------|--------------|---------|
| 1      | 18.495        | BB   | 0.4285      | 515.27405    | 17.86629     | 28.5916 |
| 2      | 22.208        | BB   | 0.5542      | 518.97247    | 13.94456     | 28.7968 |
| 3      | 26.636        | BV   | 0.6630      | 388.64386    | 8.66936      | 21.5651 |
| 4      | 28.654        | VB   | 0.6781      | 379.29935    | 8.28535      | 21.0466 |

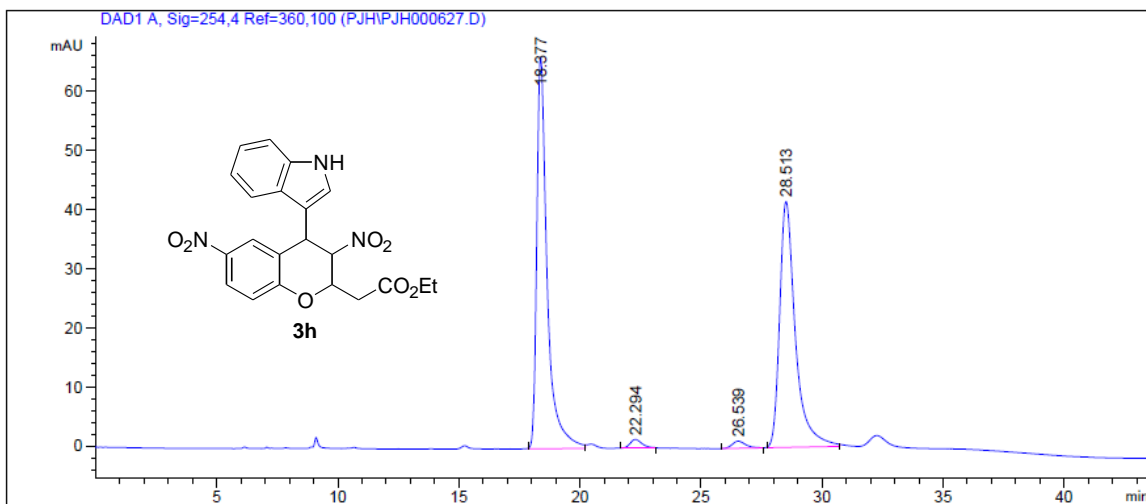

| Peak # | RetTime [min] | Type | Width [min] | Area [mAU*s] | Height [mAU] | Area %  |
|--------|---------------|------|-------------|--------------|--------------|---------|
| 1      | 18.377        | BB   | 0.4403      | 1977.49097   | 66.24683     | 50.0395 |
| 2      | 22.294        | BB   | 0.5321      | 51.97419     | 1.48585      | 1.3152  |
| 3      | 26.539        | BB   | 0.5969      | 46.21715     | 1.20120      | 1.1695  |
| 4      | 28.513        | BB   | 0.6747      | 1876.17468   | 41.56017     | 47.4758 |

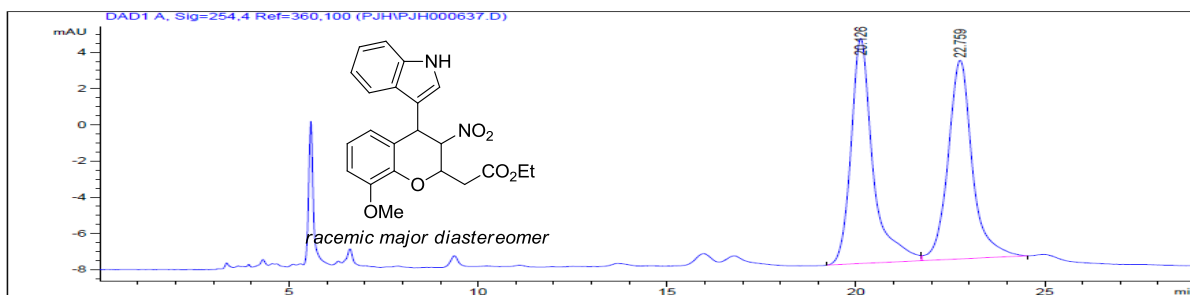

| Peak # | RetTime [min] | Type | Width [min] | Area [mAU*s] | Height [mAU] | Area %  |
|--------|---------------|------|-------------|--------------|--------------|---------|
| 1      | 20.126        | BV   | 0.5909      | 501.79147    | 12.43117     | 50.6645 |
| 2      | 22.759        | VB   | 0.6634      | 488.62848    | 10.97617     | 49.3355 |

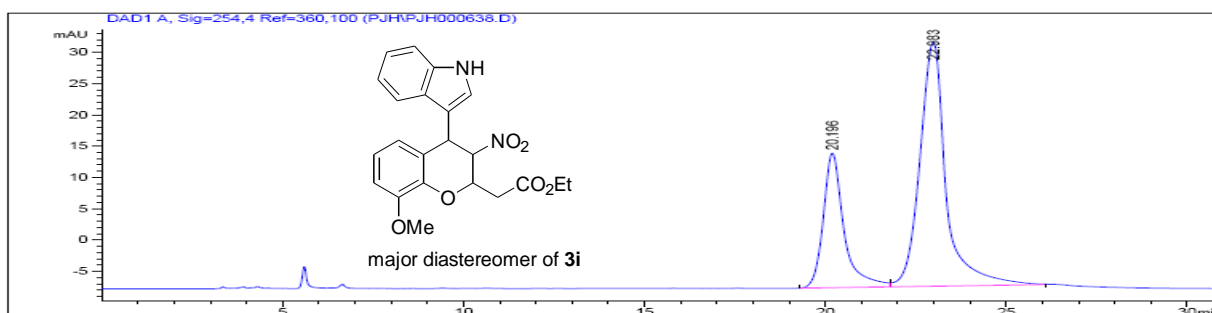

| Peak # | RetTime [min] | Type | Width [min] | Area [mAU*s] | Height [mAU] | Area %  |
|--------|---------------|------|-------------|--------------|--------------|---------|
| 1      | 20.196        | BV   | 0.5874      | 853.76044    | 21.49254     | 30.3346 |
| 2      | 22.983        | VB   | 0.7503      | 1960.71924   | 39.01451     | 69.6654 |

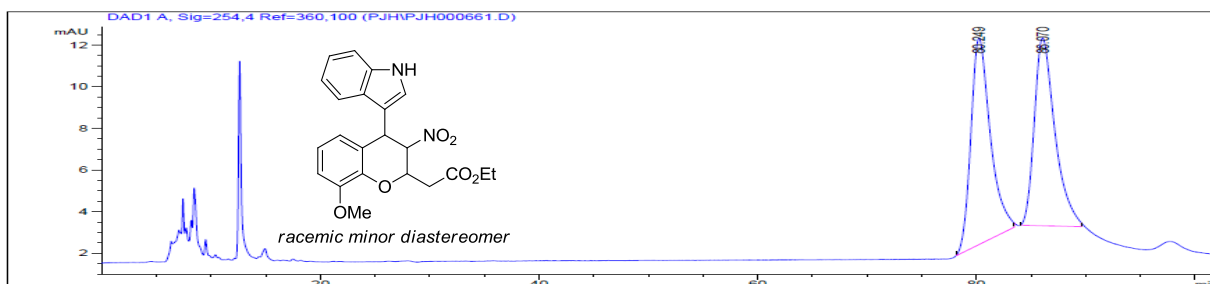

| Peak # | RetTime [min] | Type | Width [min] | Area [mAU*s] | Height [mAU] | Area %  |
|--------|---------------|------|-------------|--------------|--------------|---------|
| 1      | 80.249        | BB   | 1.6820      | 1227.86475   | 9.90668      | 50.9418 |
| 2      | 86.070        | BB   | 1.6936      | 1182.46167   | 9.01890      | 49.0582 |

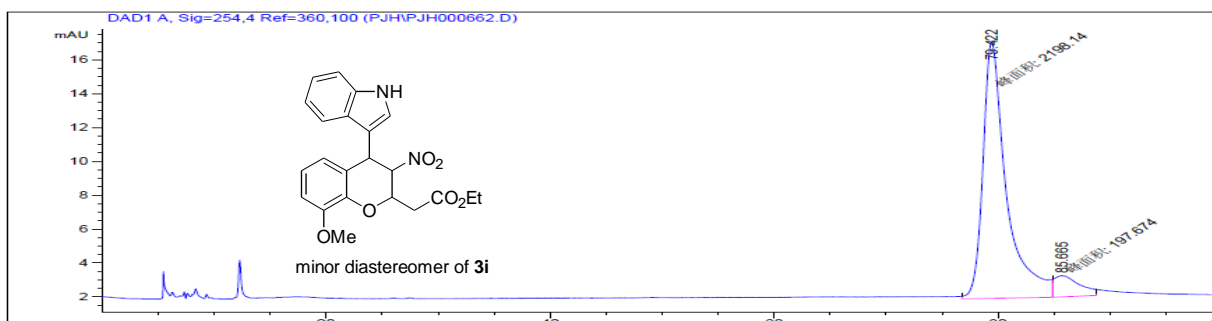

| Peak # | RetTime [min] | Type | Width [min] | Area [mAU*s] | Height [mAU] | Area %  |
|--------|---------------|------|-------------|--------------|--------------|---------|
| 1      | 79.422        | MM   | 2.4190      | 2198.14111   | 15.14480     | 91.7492 |
| 2      | 85.665        | MM   | 2.6341      | 197.67389    | 1.25071      | 8.2508  |

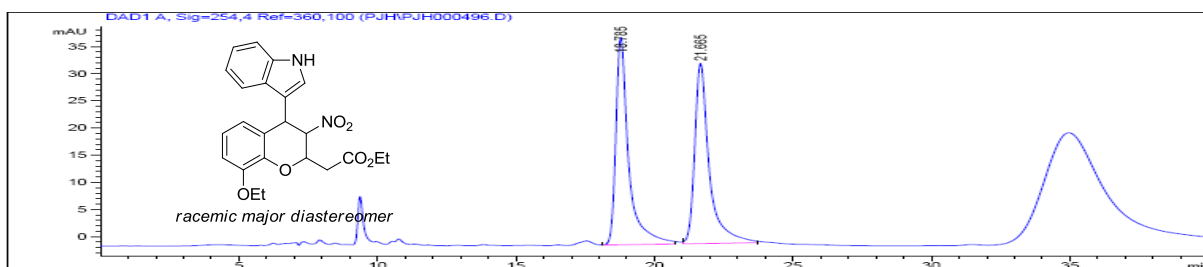

| Peak # | RetTime [min] | Type | Width [min] | Area [mAU*s] | Height [mAU] | Area %  |
|--------|---------------|------|-------------|--------------|--------------|---------|
| 1      | 18.785        | VB   | 0.4666      | 1227.09937   | 38.21683     | 50.3271 |
| 2      | 21.665        | BB   | 0.5338      | 1211.14795   | 33.18376     | 49.6729 |

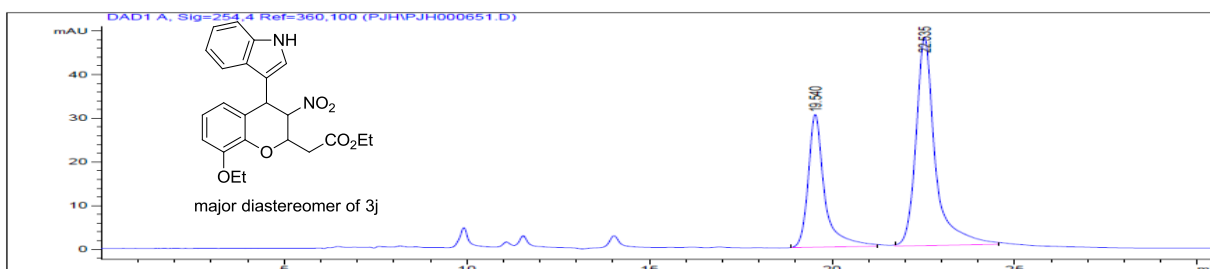

| Peak # | RetTime [min] | Type | Width [min] | Area [mAU*s] | Height [mAU] | Area %  |
|--------|---------------|------|-------------|--------------|--------------|---------|
| 1      | 19.540        | BB   | 0.4573      | 951.42200    | 30.38398     | 35.2151 |
| 2      | 22.535        | BB   | 0.5406      | 1750.32532   | 47.64565     | 64.7849 |

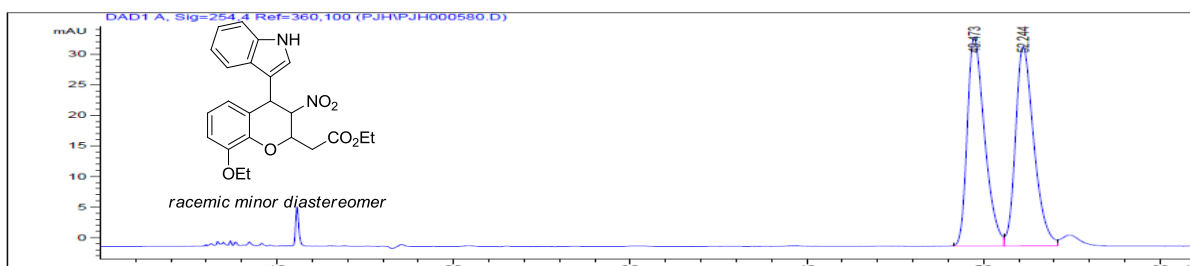

| Peak # | RetTime [min] | Type | Width [min] | Area [mAU*s] | Height [mAU] | Area %  |
|--------|---------------|------|-------------|--------------|--------------|---------|
| 1      | 49.473        | BV   | 1.0371      | 2334.13867   | 34.16302     | 49.7034 |
| 2      | 52.244        | VB   | 1.0916      | 2361.99219   | 32.66733     | 50.2966 |

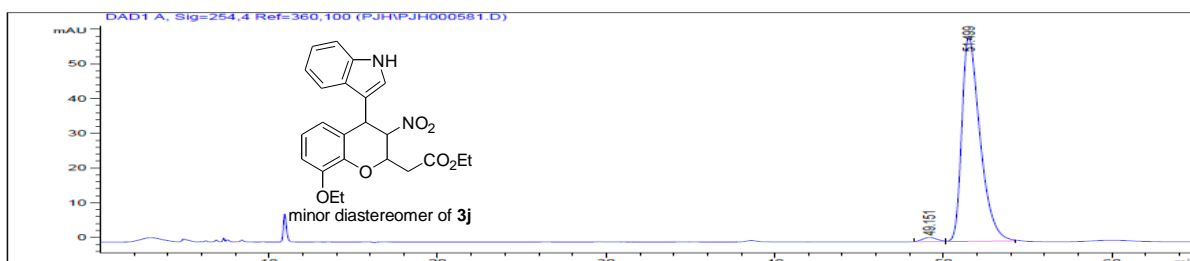

| Peak # | RetTime [min] | Type | Width [min] | Area [mAU*s] | Height [mAU] | Area %  |
|--------|---------------|------|-------------|--------------|--------------|---------|
| 1      | 49.151        | BV   | 0.7148      | 66.87046     | 1.14935      | 1.4918  |
| 2      | 51.499        | VB   | 1.1292      | 4415.74072   | 58.99606     | 98.5082 |

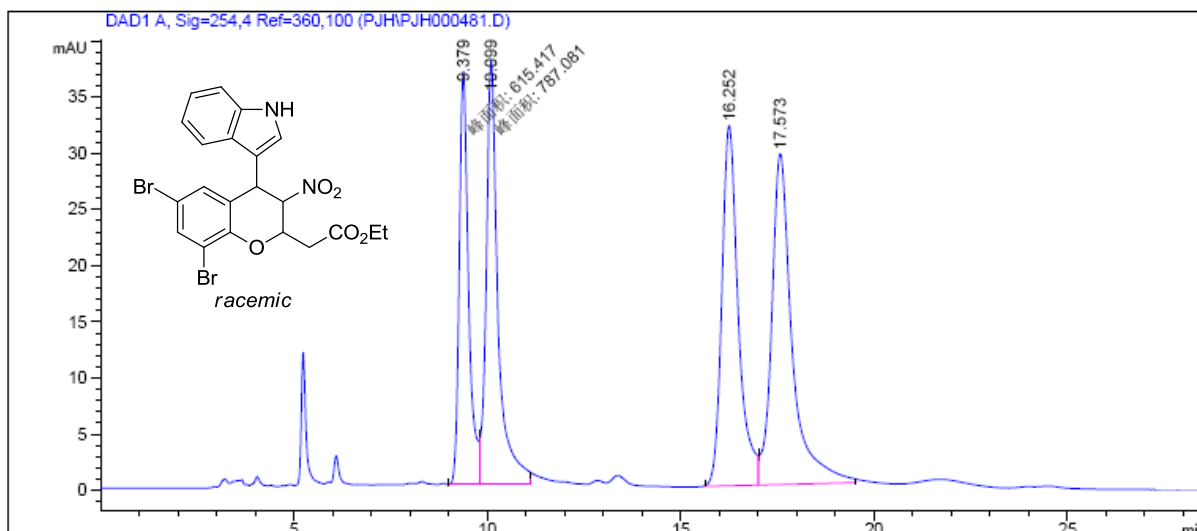

| Peak # | RetTime [min] | Type | Width [min] | Area [mAU*s] | Height [mAU] | Area %  |
|--------|---------------|------|-------------|--------------|--------------|---------|
| 1      | 9.379         | MM   | 0.2796      | 615.41724    | 36.67808     | 17.9115 |
| 2      | 10.099        | MM   | 0.3484      | 787.08063    | 37.64749     | 22.9077 |
| 3      | 16.252        | BV   | 0.4450      | 948.49451    | 32.07032     | 27.6056 |
| 4      | 17.573        | VB   | 0.5379      | 1084.88025   | 29.44399     | 31.5751 |

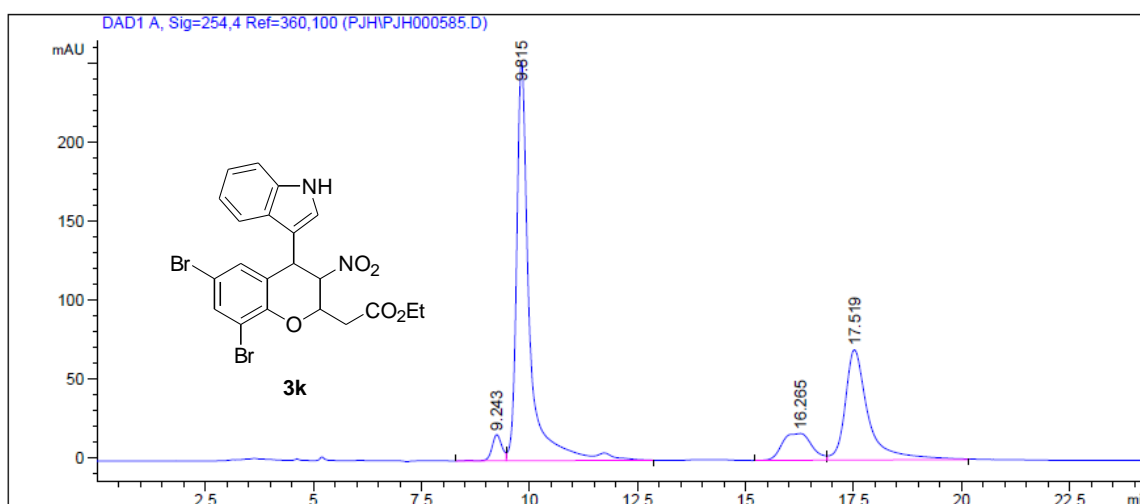

| Peak # | RetTime [min] | Type | Width [min] | Area [mAU*s] | Height [mAU] | Area %  |
|--------|---------------|------|-------------|--------------|--------------|---------|
| 1      | 9.243         | BV   | 0.2447      | 267.49939    | 16.53724     | 3.0027  |
| 2      | 9.815         | VB S | 0.2999      | 5246.45068   | 253.04375    | 58.8910 |
| 3      | 16.265        | VV   | 0.6382      | 803.31738    | 16.91024     | 9.0172  |
| 4      | 17.519        | VB   | 0.5455      | 2591.48291   | 69.75050     | 29.0892 |
